# Supplementary material for: Regiodivergent heterocyclization: a strategy for the synthesis of substituted pyrroles and furans using α-formyl ketene dithioacetals as common precursors
Source: Royal Society of Chemistry journal article supplement (doi:10.1039/c3cc48546c), 2013-12-02

## Electronic Supplementary Information

# Regiodivergent Heterocyclization: A Strategy for the Synthesis of Substituted Pyrroles and Furans Using $\alpha$ -Formyl Ketene Dithioacetals as Common Precursors

Ting Wu, Ling Pan,\* Xianxiu Xu, and Qun Liu\*

Department of Chemistry, Northeast Normal University, Changchun, 130024, China  
panl948@nenu.edu.cn; liuqun@nenu.edu.cn

### Table of Contents

|                                                                                                                    |     |
|--------------------------------------------------------------------------------------------------------------------|-----|
| I. General Information-----                                                                                        | S2  |
| II. Typical Procedures and Analytical Data of Compounds <b>3</b> , <b>4</b> , <b>5</b> , <b>6</b> , <b>7</b> ----- | S2  |
| III. Crystal data and OPTEP drawings of compound <b>4a</b> , <b>5a</b> , <b>6a</b> and <b>7b</b> -----             | S15 |
| IV Copies of $^1\text{H}$ NMR and $^{13}\text{C}$ NMR spectra-----                                                 | S19 |

## I. General Information

All reagents were purchased from commercial sources and used without further purification, unless otherwise indicated. All reactions were monitored by TLC, which was performed on precoated aluminum sheets of silica gel 60 (F254). The products were purified by flash column chromatography on silica gel (300–400 mesh). Melting points were uncorrected. NMR spectra were obtained on a Varian Inova 500 spectrometer (500 MHz for  $^1\text{H}$  NMR; 125 MHz for  $^{13}\text{C}$  NMR), with TMS as the internal standard. All chemical shifts are given in ppm. High-resolution mass spectra (HRMS) were obtained using a Bruker microTOF II focus spectrometer (ESI).  $\alpha$ -Formyl ketene dithioacetals **1** were synthesized according to the literature.<sup>1</sup>

## II. Typical Procedures and Analytical Data of Compounds **3**, **4**, **5**, **6**, **7**

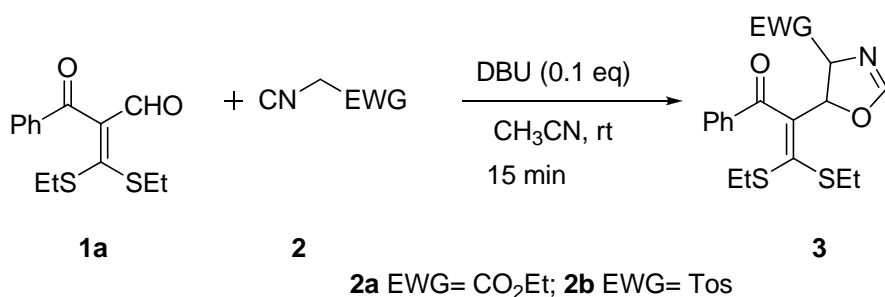

### General procedure for the synthesis of **3** (**3a** as an example):

To the mixture of **1a** (140.1 mg, 0.50 mmol) and ethyl isocyanoacetate **2a** (65  $\mu\text{L}$ , 0.55 mmol) in CH<sub>3</sub>CN (2 mL) was added 1,8-diazabicyclo[5.4.0.]undec-7-ene (DBU, 7.5  $\mu\text{L}$ , 0.05 mmol) in one portion at room temperature and stirred for about 15 min. After **1a** was consumed as indicated by TLC, the resulting mixture was poured into water (15 mL) and extracted with dichloromethane (15 mL  $\times$  3). The combined organic phase was dried over anhydrous MgSO<sub>4</sub> and concentrated *in vacuo* to give crude **3a** (190.7 mg, 97%).

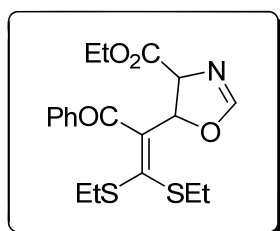

**3a**, Ethyl 5-(1,1-bis(ethylthio)-3-oxo-3-phenylprop-1-en-2-yl)-4,5-dihydrooxazole-4-carboxylate. Colorless viscous oil.  $^1\text{H}$  NMR (500 MHz, CDCl<sub>3</sub>):  $\delta$  1.04 (t,  $J$  = 7.5 Hz, 3H), 1.31–1.35 (m, 6H), 2.59–2.66 (m, 1H), 2.68–2.73 (m, 1H), 2.77–2.84 (m, 1H), 2.88–2.95 (m, 1H), 4.29 (q,  $J$  = 7.5 Hz, 2H), 5.00 (d,  $J$  = 7.5 Hz, 1H), 6.21 (d,  $J$  = 7.5 Hz, 1H), 6.71 (s, 1H), 7.47 (t,  $J$  = 7.5 Hz, 2H), 7.58 (t,  $J$  = 7.5 Hz, 1H), 7.89 (d,  $J$  = 7.5 Hz, 2H).  $^{13}\text{C}$  NMR (125 MHz, CDCl<sub>3</sub>):  $\delta$  14.0, 14.3, 15.2, 27.6, 28.2, 61.8, 73.1, 80.3, 128.5, 129.2, 133.4, 137.3, 137.4, 144.3, 155.5, 170.3, 194.5. HRMS (ESI-TOF) Calcd for C<sub>19</sub>H<sub>24</sub>NO<sub>4</sub>S<sub>2</sub><sup>+</sup> ([M + H]<sup>+</sup>) 394.1141. Found 394.1151.

(1) (a) R. K. Verma, G. K. Verma, G. Shukla and M. S. Singh, *RSC Adv.*, 2012, **2**, 2413; (b) E. R. Anabha and C. V. Asokan, *Synthesis*, 2006, 151.

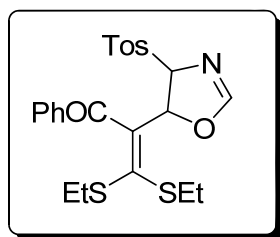

**3a'**, 3,3-Bis(ethylthio)-1-phenyl-2-(4-tosyl-4,5-dihydrooxazol-5-yl)prop-2-en-1-one. Colorless crystals. m.p. 116–117 °C. <sup>1</sup>H NMR (500 MHz, CDCl<sub>3</sub>): δ 1.01 (t, *J* = 7.5 Hz, 3H), 1.41 (t, *J* = 7.5 Hz, 3H), 2.45 (s, 3H), 2.67–2.74 (m, 2H), 2.94 (q, *J* = 7.5 Hz, 2H), 5.59 (dd, *J*<sub>1</sub> = 6.0 Hz, *J*<sub>2</sub> = 1.5 Hz, 1H), 6.73 (d, *J* = 6.0 Hz, 1H), 6.78 (d, *J* = 1.5 Hz, 1H), 7.37 (d, *J* = 8.5 Hz, 2H), 7.44 (t, *J* = 7.5 Hz, 2H), 7.57 (t, *J* = 7.5 Hz, 1H), 7.84–7.86 (m, 4H). <sup>13</sup>C NMR (125 MHz, CDCl<sub>3</sub>): δ 14.4, 15.1, 21.7, 28.3 (2C), 77.7, 89.1, 128.5, 129.2, 129.6, 129.7, 133.3, 133.5, 137.3, 140.2, 142.6, 145.4, 158.6, 194.9. HRMS (ESI-TOF) Calcd for C<sub>23</sub>H<sub>26</sub>NO<sub>4</sub>S<sub>3</sub><sup>+</sup> ([M + H]<sup>+</sup>) 476.1018. Found 476.1020.

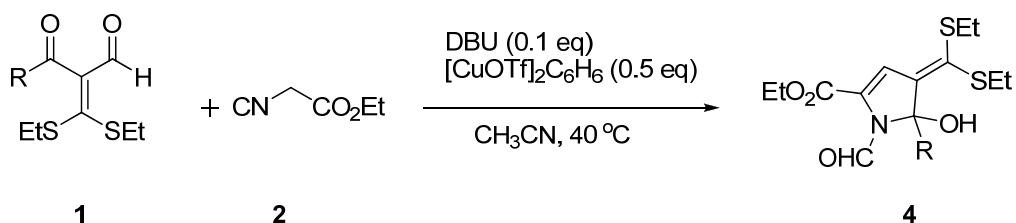

**General procedure for the synthesis of 4 (4a as an example):**

To the mixture of **1a** (140.1 mg, 0.50 mmol) and ethyl isocyanoacetate **2a** (65 μL, 0.55 mmol) in CH<sub>3</sub>CN (2 mL) was added 1,8-diazabicyclo[5.4.0.]undec-7-ene (DBU, 7.5 μL, 0.05 mmol) in one portion at room temperature. The mixture was stirred for about 15 min for the formation of **3a** as indicated by TLC. Then, [CuOTf]<sub>2</sub>C<sub>6</sub>H<sub>6</sub> (126 mg, 0.25 mmol) was added at 40 °C and the reaction mixture was stirred at 40 °C for about 1.0 h. After **3a** was consumed as indicated by TLC, the resulting mixture was poured into water (15 mL) and extracted with dichloromethane (15 mL × 3). The combined organic phase was dried over anhydrous MgSO<sub>4</sub> and concentrated *in vacuo*. The crude product was purified by flash column chromatography (silica gel, petroleum ether: EtOAc = 5 : 1, V/V) to give **4a** (190.6 mg, 97%). **4a** was obtained as a yellow crystal (m.p. 78–79 °C) and identified by the X-ray diffraction analysis (see the crystal data of **4a** in part III) since it has equilibrium isomers in solution.<sup>2</sup>

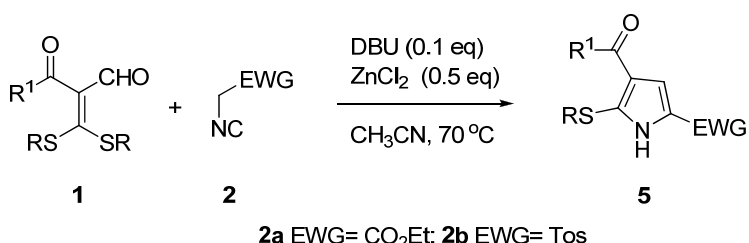

**General procedure for the synthesis of 5 (5a as an example):**

To the mixture of **1a** (140.1 mg, 0.50 mmol) and ethyl isocyanoacetate **2a** (65 μL, 0.55 mmol) in CH<sub>3</sub>CN (2 mL) was added 1,8-diazabicyclo[5.4.0.]undec-7-ene (DBU, 7.5 μL, 0.05 mmol) in one portion at room temperature. The

(2) I. S. Kondratov, V. G. Dolovanyuk, N. A. Tolmachova, I. I. Gerus, K. Bergander, R. Fröhlich and G. Haufe, *Org. Biomol. Chem.*, 2012, **10**, 8778.

mixture was stirred for about 15 min for the formation of **3a** as indicated by TLC. Then, ZnCl<sub>2</sub> (34 mg, 0.25 mmol) was added at 70 °C and the reaction mixture was stirred at 70 °C for about 2.0 h. After **3a** was consumed as indicated by TLC, the resulting mixture was poured into water (15 mL) and extracted with dichloromethane (15 mL × 3). The combined organic phase was dried over anhydrous MgSO<sub>4</sub> and concentrated *in vacuo*. The crude product was purified by flash column chromatography (silica gel, petroleum ether: EtOAc = 10 : 1, V/V) to give **5a** (140.9 mg, 93%).

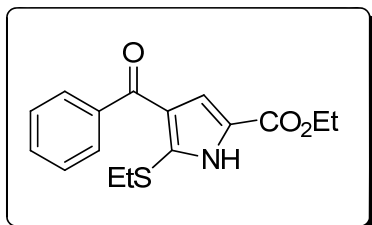

**5a**, Ethyl 4-benzoyl-5-(ethylthio)-1*H*-pyrrole-2-carboxylate. Colorless crystals. m.p. 82–83 °C. <sup>1</sup>H NMR (500 MHz, CDCl<sub>3</sub>): δ 1.35–1.38 (m, 6H), 3.07 (q, *J* = 7.5 Hz, 2H), 4.34 (q, *J* = 7.0 Hz, 2H), 7.18 (d, *J* = 2.5 Hz, 1H), 7.48 (t, *J* = 7.5 Hz, 2H), 7.55 (t, *J* = 7.5 Hz, 1H), 7.81 (d, *J* = 7.5 Hz, 2H), 9.42 (s, 1H). <sup>13</sup>C NMR (125 MHz, CDCl<sub>3</sub>): δ 14.1, 14.3, 27.3, 61.0, 118.8, 122.8, , 124.2, 128.2, 129.1, 131.8, 136.7, 139.0, 160.5, 190.2. HRMS (ESI-TOF) Calcd for C<sub>16</sub>H<sub>18</sub>NO<sub>3</sub>S<sup>+</sup> ([M + H]<sup>+</sup>) 304.1002. Found 304.1008.

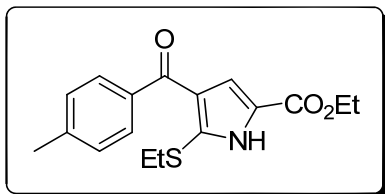

**5b**, Ethyl 5-(ethylthio)-4-(4-methylbenzoyl)-1*H*-pyrrole-2-carboxylate. Colorless viscous oil. <sup>1</sup>H NMR (500 MHz, CDCl<sub>3</sub>): δ 1.33–1.37 (m, 6H), 2.43 (s, 3H), 3.06 (q, *J* = 7.5 Hz, 2H), 4.34 (q, *J* = 7.0 Hz, 2H), 7.18 (d, *J* = 2.5 Hz, 1H), 7.27 (d, *J* = 8.0 Hz, 2H), 7.73(t, *J* = 8.0 Hz, 2H), 9.45 (s, 1H). <sup>13</sup>C NMR (125 MHz, CDCl<sub>3</sub>): δ 14.2, 14.4, 21.6, 27.5, 60.9, 118.7, 122.7, 124.5, 128.9, 129.3, 136.1, 136.2, 142.5, 160.5, 190.0. HRMS (ESI-TOF) Calcd for C<sub>17</sub>H<sub>20</sub>NO<sub>3</sub>S<sup>+</sup> ([M + H]<sup>+</sup>) 318.1158. Found 318.1166.

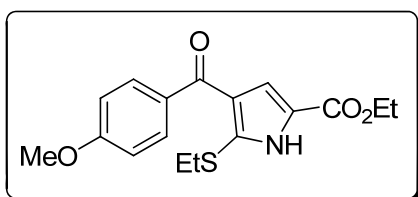

**5c**, Ethyl 5-(ethylthio)-4-(4-methoxybenzoyl)-1*H*-pyrrole-2-carboxylate. Colorless crystals. m.p. 87–88 °C. <sup>1</sup>H NMR (500 MHz, CDCl<sub>3</sub>): δ 1.32 (t, *J* = 7.5 Hz, 3H), 1.36 (t, *J* = 7.0 Hz, 3H), 3.04 (q, *J* = 7.5 Hz, 2H), 3.88 (s, 3H), 4.35 (q, *J* = 7.0 Hz, 2H), 6.96 (d, *J* = 9.0 Hz, 2H), 7.18 (d, *J* = 2.5 Hz, 1H), 7.84(d, *J* = 9.0 Hz, 2H), 9.65 (s, 1H). <sup>13</sup>C NMR (125 MHz, CDCl<sub>3</sub>): δ 14.2, 14.3, 27.9, 55.4, 60.9, 113.5, 118.5, 122.7, 125.0, 131.5, 131.6, 135.4, 160.5, 162.7, 189.0. HRMS (ESI-TOF) Calcd for C<sub>17</sub>H<sub>20</sub>NO<sub>4</sub>S<sup>+</sup> ([M + H]<sup>+</sup>) 334.1113. Found 334.1120.

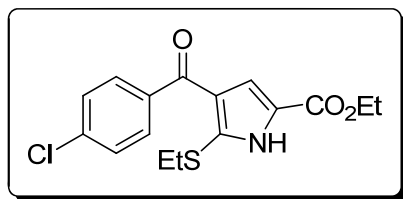

**5d**, Ethyl 4-(4-chlorobenzoyl)-5-(ethylthio)-1*H*-pyrrole-2-carboxylate. Colorless crystals. m.p. 93–94 °C.  $^1\text{H NMR}$  (500 MHz,  $\text{CDCl}_3$ ):  $\delta$  1.31–1.38 (m, 6H), 3.08 (q,  $J = 7.5$  Hz, 2H), 4.35 (q,  $J = 7.0$  Hz, 2H), 7.14 (d,  $J = 2.0$  Hz, 1H), 7.44 (d,  $J = 8.5$  Hz, 2H), 7.77 (t,  $J = 8.5$  Hz, 2H), 9.93 (s, 1H).  $^{13}\text{C NMR}$  (125 MHz,  $\text{CDCl}_3$ ):  $\delta$  14.0, 14.3, 27.4, 61.0, 118.5, 123.0, 124.0, 128.5, 130.4, 136.8, 137.3, 138.0, 160.5, 188.8. **HRMS** (ESI-TOF) Calcd for  $\text{C}_{16}\text{H}_{17}\text{ClNO}_3\text{S}^+$  ( $[\text{M} + \text{H}]^+$ ) 338.0612. Found 338.0612.

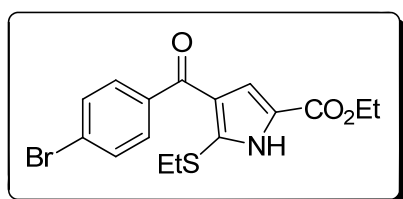

**5e**, Ethyl 4-(4-bromobenzoyl)-5-(ethylthio)-1*H*-pyrrole-2-carboxylate. Colorless crystals. m.p. 123–124 °C.  $^1\text{H NMR}$  (500 MHz,  $\text{CDCl}_3$ ):  $\delta$  1.35–1.38 (m, 6H), 3.06 (q,  $J = 7.5$  Hz, 2H), 4.34 (q,  $J = 7.0$  Hz, 2H), 7.13 (d,  $J = 2.5$  Hz, 1H), 7.62 (d,  $J = 8.5$  Hz, 2H), 7.69 (d,  $J = 8.5$  Hz, 2H), 9.37 (s, 1H).  $^{13}\text{C NMR}$  (125 MHz,  $\text{CDCl}_3$ ):  $\delta$  14.1, 14.4, 27.3, 61.0, 118.4, 123.0, 123.7, 126.7, 130.6, 131.6, 137.0, 137.7, 160.3, 189.0. **HRMS** (ESI-TOF) Calcd for  $\text{C}_{16}\text{H}_{17}\text{BrNO}_3\text{S}^+$  ( $[\text{M} + \text{H}]^+$ ) 382.0107. Found 382.0102.

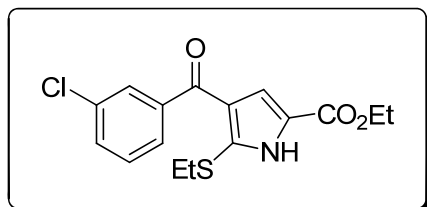

**5f**, Ethyl 4-(3-chlorobenzoyl)-5-(ethylthio)-1*H*-pyrrole-2-carboxylate. Colorless viscous oil.  $^1\text{H NMR}$  (500 MHz,  $\text{CDCl}_3$ ):  $\delta$  1.34–1.39 (m, 6H), 3.08 (q,  $J = 7.5$  Hz, 2H), 4.36 (q,  $J = 7.0$  Hz, 2H), 7.15 (d,  $J = 2.5$  Hz, 1H), 7.42 (d,  $J = 8.0$  Hz, 1H), 7.52 (d,  $J = 8.0$  Hz, 1H), 7.68 (d,  $J = 8.0$  Hz, 1H), 7.78 (s, 1H), 9.70 (s, 1H).  $^{13}\text{C NMR}$  (125 MHz,  $\text{CDCl}_3$ ):  $\delta$  14.0, 14.3, 27.2, 61.1, 118.5, 123.1, 123.6, 127.1, 129.0, 129.6, 131.7, 134.4, 137.3, 140.6, 160.4, 188.6. **HRMS** (ESI-TOF) Calcd for  $\text{C}_{16}\text{H}_{17}\text{ClNO}_3\text{S}^+$  ( $[\text{M} + \text{H}]^+$ ) 338.0618. Found 338.0614.

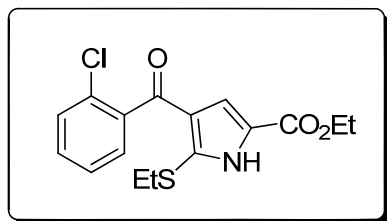

**5g**, Ethyl 4-(2-chlorobenzoyl)-5-(ethylthio)-1*H*-pyrrole-2-carboxylate. Colorless crystals. m.p. 108–109 °C.  $^1\text{H NMR}$  (500 MHz,  $\text{CDCl}_3$ ):  $\delta$  1.32–1.38 (m, 6H), 3.06 (q,  $J = 7.5$  Hz, 2H), 4.31 (q,  $J = 7.0$  Hz, 2H), 6.91 (d,  $J = 2.5$

Hz, 1H), 7.32–7.41 (m, 3H), 7.44 (d,  $J = 7.5$  Hz, 1H), 9.37 (s, 1H).  $^{13}\text{C}$  NMR (125 MHz,  $\text{CDCl}_3$ ):  $\delta$  14.0, 14.3, 26.9, 61.0, 118.9, 123.2, 124.1, 126.6, 128.6, 130.0, 130.7, 130.9, 137.2, 139.4, 160.3, 189.0. HRMS (ESI-TOF) Calcd for  $\text{C}_{16}\text{H}_{16}\text{ClNNaO}_3\text{S}^+$  ( $[\text{M} + \text{Na}]^+$ ) 360.0437. Found 360.0439.

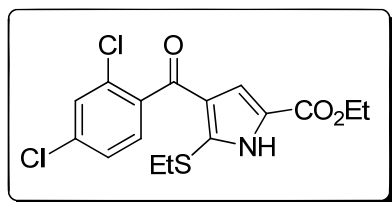

**5h**, Ethyl 4-(2,4-dichlorobenzoyl)-5-(ethylthio)-1*H*-pyrrole-2-carboxylate. Colorless crystals. m.p. 89–90 °C.  $^1\text{H}$  NMR (500 MHz,  $\text{CDCl}_3$ ):  $\delta$  1.33–1.38 (m, 6H), 3.06 (q,  $J = 7.5$  Hz, 2H), 4.32 (q,  $J = 7.0$  Hz, 2H), 6.89 (d,  $J = 2.5$  Hz, 1H), 7.31–7.35 (m, 2H), 7.47 (s, 1H), 9.47 (s, 1H).  $^{13}\text{C}$  NMR (125 MHz,  $\text{CDCl}_3$ ):  $\delta$  14.0, 14.3, 26.8, 61.1, 118.7, 123.4, 123.8, 127.0, 129.7, 130.0, 132.0, 136.1, 137.7, 137.8, 160.3, 187.9. HRMS (ESI-TOF) Calcd for  $\text{C}_{16}\text{H}_{16}\text{Cl}_2\text{NO}_3\text{S}^+$  ( $[\text{M} + \text{H}]^+$ ) 372.0222. Found 372.0217.

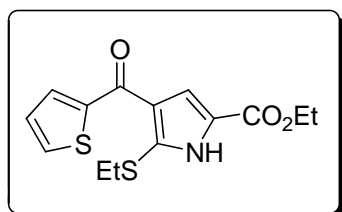

**5i**, Ethyl 5-(ethylthio)-4-(thiophene-2-carbonyl)-1*H*-pyrrole-2-carboxylate. Colorless crystals. m.p. 90–91 °C.  $^1\text{H}$  NMR (500 MHz,  $\text{CDCl}_3$ ):  $\delta$  1.34 (t,  $J = 7.5$  Hz, 3H), 1.39 (t,  $J = 7.0$  Hz, 3H), 3.07 (q,  $J = 7.5$  Hz, 2H), 4.37 (q,  $J = 7.0$  Hz, 2H), 7.16 (d,  $J = 4.5$  Hz, 1H), 7.42 (d,  $J = 2.5$  Hz, 1H), 7.65 (d,  $J = 4.5$  Hz, 1H), 7.77 (d,  $J = 3.5$  Hz, 1H), 9.45 (s, 1H).  $^{13}\text{C}$  NMR (125 MHz,  $\text{CDCl}_3$ ):  $\delta$  14.2, 14.4, 27.9, 61.0, 117.4, 123.1, 124.5, 127.8, 132.6, 132.9, 136.0, 144.5, 160.3, 181.0. HRMS (ESI-TOF) Calcd for  $\text{C}_{14}\text{H}_{16}\text{NO}_3\text{S}_2^+$  ( $[\text{M} + \text{H}]^+$ ) 310.0566. Found 310.0564.

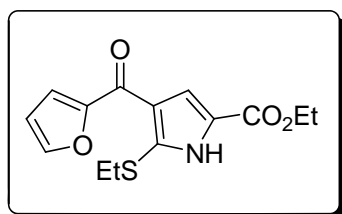

**5j**, Ethyl 5-(ethylthio)-4-(furan-2-carbonyl)-1*H*-pyrrole-2-carboxylate. Colorless crystals. m.p. 150–151 °C.  $^1\text{H}$  NMR (500 MHz,  $\text{CDCl}_3$ ):  $\delta$  1.33–1.39 (m, 6H), 3.06 (q,  $J = 7.5$  Hz, 2H), 4.35 (q,  $J = 7.0$  Hz, 2H), 6.55 (d,  $J = 2.0$  Hz, 1H), 7.29 (d,  $J = 3.0$  Hz, 1H), 7.64 (s, 1H), 7.70 (d,  $J = 2.0$  Hz, 1H), 9.43 (s, 1H).  $^{13}\text{C}$  NMR (125 MHz,  $\text{CDCl}_3$ ):  $\delta$  13.9, 14.4, 26.8, 60.9, 112.1, 117.8, 117.9, 122.5, 123.1, 138.2, 145.7, 153.5, 160.5, 175.6. HRMS (ESI-TOF) Calcd for  $\text{C}_{14}\text{H}_{15}\text{NNaO}_4\text{S}^+$  ( $[\text{M} + \text{Na}]^+$ ) 316.0619. Found 316.0611.

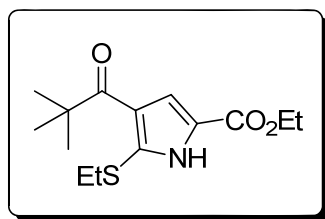

**5k**, Ethyl 5-(ethylthio)-4-pivaloyl-1*H*-pyrrole-2-carboxylate. Colorless crystals. m.p. 103–104 °C.  $^1\text{H NMR}$  (500 MHz,  $\text{CDCl}_3$ ):  $\delta$  1.34 (s, 9H), 1.36–1.40 (m, 6H), 3.01 (q,  $J = 7.5$  Hz, 2H), 4.35 (q,  $J = 7.0$  Hz, 2H), 7.35 (d,  $J = 2.5$  Hz, 1H), 9.26 (s, 1H).  $^{13}\text{C NMR}$  (125 MHz,  $\text{CDCl}_3$ ):  $\delta$  13.5, 14.4, 25.9, 27.7, 43.6, 60.8, 116.7, 121.3, 122.2, 139.0, 160.5, 201.5. **HRMS** (ESI-TOF) Calcd for  $\text{C}_{14}\text{H}_{22}\text{NO}_3\text{S}^+$  ( $[\text{M} + \text{H}]^+$ ) 284.1315. Found 284.1314.

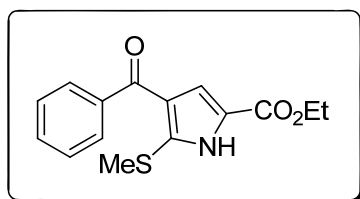

**5l**, Ethyl 4-benzoyl-5-(methylthio)-1*H*-pyrrole-2-carboxylate. Colorless crystals. m.p. 164–165 °C.  $^1\text{H NMR}$  (500 MHz,  $\text{CDCl}_3$ ):  $\delta$  1.34 (t,  $J = 7.0$  Hz, 3H), 2.59 (s, 3H), 4.32 (q,  $J = 7.0$  Hz, 2H), 7.18 (d,  $J = 2.5$  Hz, 1H), 7.46 (t,  $J = 7.5$  Hz, 2H), 7.53 (t,  $J = 7.5$  Hz, 1H), 7.79 (d,  $J = 7.5$  Hz, 2H), 9.51 (s, 1H).  $^{13}\text{C NMR}$  (125 MHz,  $\text{CDCl}_3$ ):  $\delta$  14.3, 15.0, 60.9, 118.9, 122.5, 122.8, 128.2, 128.8, 131.6, 139.0, 139.8, 160.5, 190.0. **HRMS** (ESI-TOF) Calcd for  $\text{C}_{15}\text{H}_{16}\text{NO}_3\text{S}^+$  ( $[\text{M} + \text{H}]^+$ ) 290.0845. Found 290.0845.

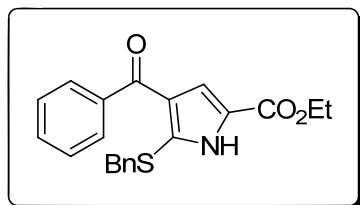

**5m**, Ethyl 4-benzoyl-5-(benzylthio)-1*H*-pyrrole-2-carboxylate. Colorless crystals. m.p. 143–144 °C.  $^1\text{H NMR}$  (500 MHz,  $\text{CDCl}_3$ ):  $\delta$  1.24 (t,  $J = 7.0$  Hz, 3H), 4.17 (s, 2H), 4.20 (q,  $J = 7.0$  Hz, 2H), 7.04 (d,  $J = 2.5$  Hz, 1H), 7.16–7.18 (m, 1H), 7.18–7.24 (m, 4H), 7.39 (t,  $J = 7.5$  Hz, 2H), 7.48 (t,  $J = 7.5$  Hz, 1H), 7.72 (d,  $J = 8.5$  Hz, 2H), 9.24 (s, 1H).  $^{13}\text{C NMR}$  (125 MHz,  $\text{CDCl}_3$ ):  $\delta$  14.3, 38.7, 60.9, 118.4, 123.0, 125.2, 127.8, 128.2, 128.7, 128.9, 129.2, 131.9, 135.1, 136.7, 138.9, 160.1, 190.3. **HRMS** (ESI-TOF) Calcd for  $\text{C}_{21}\text{H}_{19}\text{NNaO}_3\text{S}^+$  ( $[\text{M} + \text{Na}]^+$ ) 388.0983. Found 388.0982.

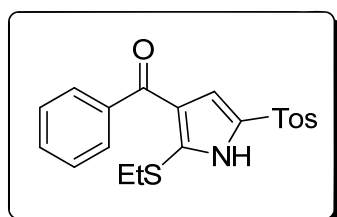

**5n**, (2-(Ethylthio)-5-tosyl-1*H*-pyrrol-3-yl)(phenyl)methanone. Colorless crystals. m.p. 180–181 °C.  $^1\text{H NMR}$  (500

MHz, CDCl<sub>3</sub>): δ 1.27 (t, *J* = 7.5 Hz, 3H), 2.41 (s, 3H), 3.01 (q, *J* = 7.5 Hz, 2H), 7.13 (d, *J* = 3.0 Hz, 1H), 7.30 (d, *J* = 8.0 Hz, 2H), 7.46 (t, *J* = 7.5 Hz, 2H), 7.56 (t, *J* = 7.5 Hz, 1H), 7.76 (d, *J* = 7.5 Hz, 2H), 7.83 (d, *J* = 8.0 Hz, 2H), 9.85 (s, 1H). <sup>13</sup>C NMR (125 MHz, CDCl<sub>3</sub>): δ 14.0, 21.6, 27.4, 118.9, 124.3, 127.0, 128.4, 128.9, 129.0, 130.1, 132.1, 138.2, 138.4, 138.5, 144.6, 189.7. HRMS (ESI-TOF) Calcd for C<sub>20</sub>H<sub>20</sub>NO<sub>3</sub>S<sub>2</sub><sup>+</sup> ([M + H]<sup>+</sup>) 386.0879. Found 386.0869.

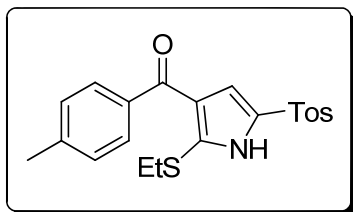

**5o**, (2-(Ethylthio)-5-tosyl-1*H*-pyrrol-3-yl)(*p*-tolyl)methanone. Colorless crystals. m.p. 151–152 °C. <sup>1</sup>H NMR (500 MHz, CDCl<sub>3</sub>): δ 1.30 (t, *J* = 7.5 Hz, 3H), 2.42 (s, 3H), 2.43 (s, 3H), 3.00 (q, *J* = 7.5 Hz, 2H), 7.11 (d, *J* = 2.5 Hz, 1H), 7.27 (d, *J* = 8.0 Hz, 2H), 7.31 (d, *J* = 8.5 Hz, 2H), 7.69 (d, *J* = 8.0 Hz, 2H), 7.80 (d, *J* = 8.5 Hz, 2H), 9.35 (s, 1H). <sup>13</sup>C NMR (125 MHz, CDCl<sub>3</sub>): δ 14.0, 21.6, 27.5, 29.7, 118.7, 124.7, 126.9, 128.7, 129.0, 129.3, 130.1, 135.8, 137.5, 138.5, 142.9, 144.6, 189.4. HRMS (ESI-TOF) Calcd for C<sub>21</sub>H<sub>22</sub>NO<sub>3</sub>S<sub>2</sub><sup>+</sup> ([M + H]<sup>+</sup>) 400.1036. Found 400.1044.

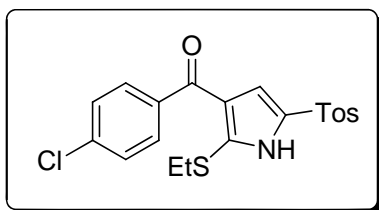

**5p**, (4-Chlorophenyl)(2-(ethylthio)-5-tosyl-1*H*-pyrrol-3-yl)methanone. Colorless crystals. m.p. 170–171 °C. <sup>1</sup>H NMR (500 MHz, CDCl<sub>3</sub>): δ 1.26 (t, *J* = 7.5 Hz, 3H), 2.41 (s, 3H), 3.00 (q, *J* = 7.5 Hz, 2H), 7.08 (s, 1H), 7.31 (d, *J* = 8.0 Hz, 2H), 7.44 (d, *J* = 8.5 Hz, 2H), 7.71 (d, *J* = 8.0 Hz, 2H), 7.83 (d, *J* = 8.5 Hz, 2H), 9.88 (s, 1H). <sup>13</sup>C NMR (125 MHz, CDCl<sub>3</sub>): δ 13.9, 21.6, 27.4, 118.5, 124.0, 126.9, 128.7, 129.2, 130.1, 130.4, 136.8, 137.5, 138.4, 138.5, 144.7, 188.4. HRMS (ESI-TOF) Calcd for C<sub>20</sub>H<sub>19</sub>ClNO<sub>3</sub>S<sub>2</sub><sup>+</sup> ([M + H]<sup>+</sup>) 420.0489. Found 420.0495.

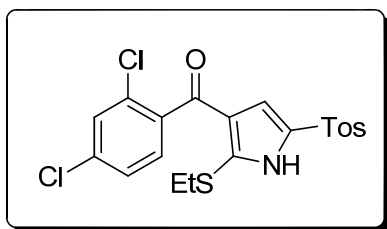

**5q**, (2,4-Dichlorophenyl)(2-(ethylthio)-5-tosyl-1*H*-pyrrol-3-yl)methanone. Colorless crystals. m.p. 210–211 °C. <sup>1</sup>H NMR (500 MHz, CDCl<sub>3</sub>): δ 1.28 (t, *J* = 7.5 Hz, 3H), 2.43 (s, 3H), 3.00 (q, *J* = 7.5 Hz, 2H), 6.88 (d, *J* = 2.5 Hz, 1H), 7.28 (d, *J* = 8.5 Hz, 1H), 7.31–7.34 (m, 3H), 7.46 (d, *J* = 2.0 Hz, 1H), 7.83 (d, *J* = 8.5 Hz, 2H), 9.84 (s, 1H). <sup>13</sup>C NMR (125 MHz, CDCl<sub>3</sub>): δ 13.8, 21.6, 26.8, 119.0, 123.5, 127.0, 127.1, 129.4, 129.8, 130.1, 130.2, 132.0, 136.5, 137.2, 138.1, 139.7, 144.9, 187.4. HRMS (ESI-TOF) Calcd for C<sub>20</sub>H<sub>18</sub>Cl<sub>2</sub>NO<sub>3</sub>S<sup>+</sup> ([M + H]<sup>+</sup>) 454.0100. Found 454.0106.



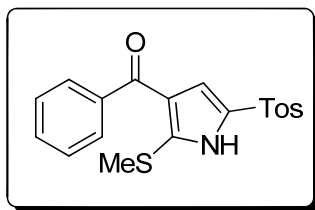

**5r**, (2-(methylthio)-5-tosyl-1*H*-pyrrol-3-yl)(phenyl)methanone. Colorless crystals. m.p. 76–77 °C.  $^1\text{H NMR}$  (500 MHz,  $\text{CDCl}_3$ ):  $\delta$  2.41 (s, 3H), 2.53 (s, 3H), 7.17 (s, 1H), 7.30 (d,  $J = 8.0$  Hz, 2H), 7.47 (t,  $J = 7.5$  Hz, 2H), 7.56 (t,  $J = 7.5$  Hz, 1H), 7.76 (t,  $J = 7.5$  Hz, 2H), 7.84 (d,  $J = 8.0$  Hz, 2H), 9.91 (s, 1H).  $^{13}\text{C NMR}$  (125 MHz,  $\text{CDCl}_3$ ):  $\delta$  15.2, 21.6, 119.3, 122.6, 126.9, 128.4, 128.6, 128.9, 130.1, 132.0, 138.5, 138.6, 141.5, 144.6, 189.5. **HRMS** (ESI-TOF) Calcd for  $\text{C}_{19}\text{H}_{18}\text{NO}_3\text{S}_2^+$  ( $[\text{M} + \text{H}]^+$ ) 372.0723. Found 372.0731.

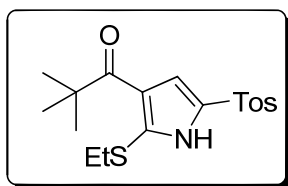

**5s**, 1-(2-(ethylthio)-5-tosyl-1*H*-pyrrol-3-yl)-2,2-dimethylpropan-1-one. Colorless crystals. m.p. 146–147 °C.  $^1\text{H NMR}$  (500 MHz,  $\text{CDCl}_3$ ):  $\delta$  1.29 (m, 12H), 2.42 (s, 3H), 2.94 (q,  $J = 7.5$  Hz, 2H), 7.29 (d,  $J = 2.5$  Hz, 1H), 7.32 (d,  $J = 8.0$  Hz, 2H), 7.84 (d,  $J = 8.0$  Hz, 2H), 9.40 (s, 1H).  $^{13}\text{C NMR}$  (125 MHz,  $\text{CDCl}_3$ ):  $\delta$  13.4, 21.6, 26.1, 27.4, 43.7, 117.0, 121.4, 126.8, 128.0, 130.1, 138.7, 140.7, 144.5, 201.2. **HRMS** (ESI-TOF) Calcd for  $\text{C}_{18}\text{H}_{24}\text{NO}_3\text{S}_2^+$  ( $[\text{M} + \text{H}]^+$ ) 366.1192. Found 366.1190.

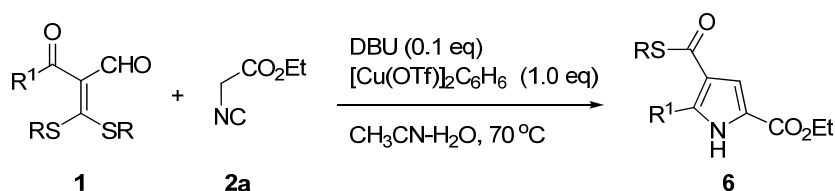

**General procedure for the synthesis of 6 (6a as an example):**

To the mixture of **1a** (140.1 mg, 0.50 mmol) and ethyl isocyanoacetate **2a** (65  $\mu\text{L}$ , 0.55 mmol) in  $\text{CH}_3\text{CN}$  (2 mL) was added 1,8-diazabicyclo[5.4.0.]undec-7-ene (DBU, 7.5  $\mu\text{L}$ , 0.05 mmol) in one portion at room temperature. The mixture was stirred for about 15 min for the formation of **3a** as indicated by TLC. Then,  $\text{H}_2\text{O}$  (100  $\mu\text{L}$ , 5.6 mmol) and  $[\text{Cu}(\text{OTf})_2]\cdot\text{C}_6\text{H}_6$  (252 mg, 0.50 mmol) were added at 70 °C and the reaction mixture was stirred at 70 °C for about 12.0 h. After **3a** was consumed as indicated by TLC, the resulting mixture was poured into water (15 mL) and extracted with dichloromethane (15 mL  $\times$  3). The combined organic phase was dried over anhydrous  $\text{MgSO}_4$  and concentrated *in vacuo*. The crude product was purified by flash column chromatography (silica gel, petroleum ether: EtOAc = 15 : 1, V/V) to give **6a** (136.4 mg, 90%).

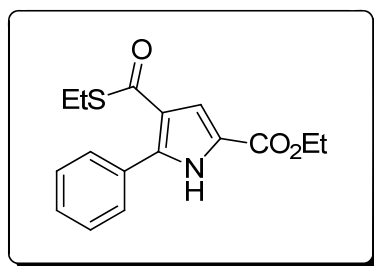

**6a**, Ethyl 4-((ethylthio)carbonyl)-5-phenyl-1*H*-pyrrole-2-carboxylate. Colorless crystals. m.p. 164–165 °C.  $^1\text{H}$  NMR (500 MHz,  $\text{CDCl}_3$ ):  $\delta$  1.27–1.33 (m, 6H), 2.96 (q,  $J = 7.5$  Hz, 2H), 4.22 (q,  $J = 7.0$  Hz, 2H), 7.42–7.44 (m, 4H), 7.61–7.63 (m, 2H), 9.84 (s, 1H).  $^{13}\text{C}$  NMR (125 MHz,  $\text{CDCl}_3$ ):  $\delta$  14.3, 15.0, 23.1, 61.0, 116.8, 121.6, 122.4, 128.3, 129.1, 129.3, 130.6, 138.3, 160.9, 186.4. HRMS (ESI-TOF) Calcd for  $\text{C}_{16}\text{H}_{18}\text{NO}_3\text{S}^+$  ( $[\text{M} + \text{H}]^+$ ) 304.1002. Found 304.1012.

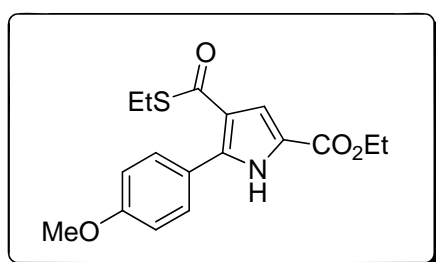

**6b**, Ethyl 4-((ethylthio)carbonyl)-5-(4-methoxyphenyl)-1*H*-pyrrole-2-carboxylate. Colorless crystals. m.p. 159–160 °C.  $^1\text{H}$  NMR (500 MHz,  $\text{CDCl}_3$ ):  $\delta$  1.29 (t,  $J = 7.5$  Hz, 3H), 1.34 (t,  $J = 7.0$  Hz, 3H), 2.96 (q,  $J = 7.5$  Hz, 2H), 3.85 (s, 3H), 4.27 (q,  $J = 7.0$  Hz, 2H), 6.95 (d,  $J = 9.0$  Hz, 2H), 7.42 (d,  $J = 2.5$  Hz, 1H), 7.57 (d,  $J = 9.0$  Hz, 2H), 9.63 (s, 1H).  $^{13}\text{C}$  NMR (125 MHz,  $\text{CDCl}_3$ ):  $\delta$  14.3, 15.0, 23.1, 55.3, 60.9, 113.7, 116.9, 121.1, 122.0, 122.8, 130.5, 138.4, 160.4, 160.9, 186.4. HRMS (ESI-TOF) Calcd for  $\text{C}_{17}\text{H}_{19}\text{NNaO}_4\text{S}^+$  ( $[\text{M} + \text{H}]^+$ ) 356.0932. Found 356.0949.

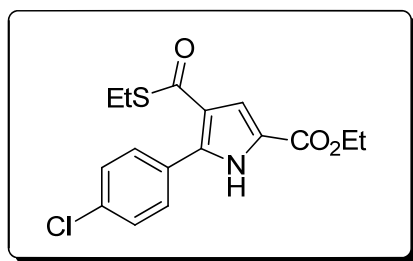

**6c**, Ethyl 5-(4-chlorophenyl)-4-((ethylthio)carbonyl)-1*H*-pyrrole-2-carboxylate. Colorless crystals. m.p. 163–164 °C.  $^1\text{H}$  NMR (500 MHz,  $\text{CDCl}_3$ ):  $\delta$  1.29 (t,  $J = 7.5$  Hz, 3H), 1.34 (t,  $J = 7.0$  Hz, 3H), 2.97 (q,  $J = 7.5$  Hz, 2H), 4.25 (q,  $J = 7.0$  Hz, 2H), 7.41 (q,  $J = 5.0$  Hz, 3H), 7.56 (q,  $J = 5.0$  Hz, 2H), 9.73 (s, 1H).  $^{13}\text{C}$  NMR (125 MHz,  $\text{CDCl}_3$ ):  $\delta$  14.3, 14.9, 23.2, 61.1, 116.8, 121.8, 122.6, 128.5, 129.0, 130.5, 135.4, 137.0, 160.9, 186.5. HRMS (ESI-TOF) Calcd for  $\text{C}_{16}\text{H}_{17}\text{ClNO}_3\text{S}^+$  ( $[\text{M} + \text{H}]^+$ ) 338.0612. Found 338.0620.

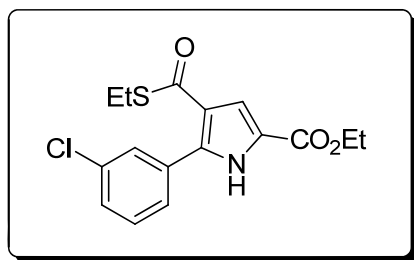

**6d**, Ethyl 5-(3-chlorophenyl)-4-((ethylthio)carbonyl)-1*H*-pyrrole-2-carboxylate. Colorless crystals. m.p. 154–155 °C. **<sup>1</sup>H NMR** (500 MHz, CDCl<sub>3</sub>): δ 1.28–1.34 (m, 6H), 2.97 (q, *J* = 7.5 Hz, 2H), 4.24 (q, *J* = 7.0 Hz, 2H), 7.34–7.42 (m, 3H), 7.52–7.54 (m, 1H), 7.59 (d, *J* = 1.5 Hz, 1H), 10.01 (s, 1H). **<sup>13</sup>C NMR** (125 MHz, CDCl<sub>3</sub>): δ 14.3, 14.9, 23.2, 61.2, 116.8, 122.0, 122.8, 127.6, 129.0, 129.3, 129.5, 132.3, 134.2, 136.5, 160.9, 186.4. **HRMS** (ESI-TOF) Calcd for C<sub>16</sub>H<sub>17</sub>ClNO<sub>3</sub>S<sup>+</sup> ([M + H]<sup>+</sup>) 338.0612. Found 338.0617.

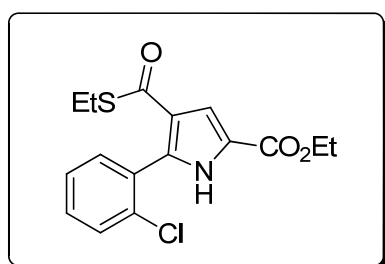

**6e**, Ethyl 5-(2-chlorophenyl)-4-((ethylthio)carbonyl)-1*H*-pyrrole-2-carboxylate. Colorless crystals. m.p. 155–156 °C. **<sup>1</sup>H NMR** (500 MHz, CDCl<sub>3</sub>): δ 1.25 (t, *J* = 7.5 Hz, 3H), 1.31 (t, *J* = 7.0 Hz, 3H), 2.93 (q, *J* = 7.5 Hz, 2H), 4.19 (q, *J* = 7.0 Hz, 2H), 7.32–7.35 (m, 1H), 7.37–7.41 (m, 2H), 7.44–7.49 (m, 2H), 9.92 (s, 1H). **<sup>13</sup>C NMR** (125 MHz, CDCl<sub>3</sub>): δ 14.3, 15.0, 23.0, 61.0, 115.4, 122.7, 123.4, 126.5, 129.7, 130.2, 130.6, 132.1, 134.0, 134.6, 160.9, 185.9. **HRMS** (ESI-TOF) Calcd for C<sub>16</sub>H<sub>17</sub>ClNO<sub>3</sub>S<sup>+</sup> ([M + H]<sup>+</sup>) 338.0612. Found 338.0603.

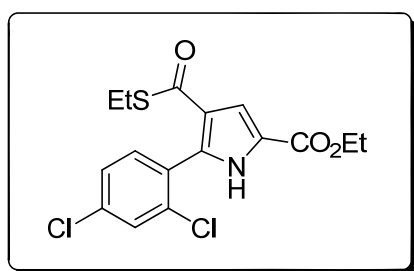

**6f**, Ethyl 5-(2,4-dichlorophenyl)-4-((ethylthio)carbonyl)-1*H*-pyrrole-2-carboxylate. Colorless crystals. m.p. 145–146 °C. **<sup>1</sup>H NMR** (500 MHz, CDCl<sub>3</sub>): δ 1.26 (t, *J* = 7.5 Hz, 3H), 1.34 (t, *J* = 7.0 Hz, 3H), 2.94 (q, *J* = 7.5 Hz, 2H), 4.24 (q, *J* = 7.0 Hz, 2H), 7.32–7.34 (m, 1H), 7.38–7.40 (m, 2H), 7.50 (d, *J* = 1.5 Hz, 1H), 9.77 (s, 1H). **<sup>13</sup>C NMR** (125 MHz, CDCl<sub>3</sub>): δ 14.3, 14.9, 23.0, 61.1, 115.4, 123.0, 123.6, 127.0, 128.7, 129.6, 133.0, 133.2, 134.8, 136.1, 160.8, 186.0. **HRMS** (ESI-TOF) Calcd for C<sub>16</sub>H<sub>16</sub>Cl<sub>2</sub>NO<sub>3</sub>S<sup>+</sup> ([M + H]<sup>+</sup>) 372.0222. Found 372.0214.

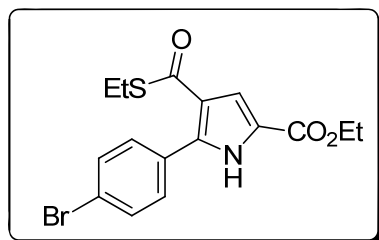

**6g**, Ethyl 5-(4-bromophenyl)-4-((ethylthio)carbonyl)-1*H*-pyrrole-2-carboxylate. Colorless crystals. m.p. 168–169 °C.  $^1\text{H NMR}$  (500 MHz,  $\text{CDCl}_3$ ):  $\delta$  1.27–1.33 (m, 6H), 2.96 (q,  $J = 7.5$  Hz, 2H), 4.18 (q,  $J = 7.0$  Hz, 2H), 7.40 (d,  $J = 2.0$  Hz, 1H), 7.49 (d,  $J = 8.5$  Hz, 2H), 7.55 (d,  $J = 8.5$  Hz, 2H), 10.09 (s, 1H).  $^{13}\text{C NMR}$  (125 MHz,  $\text{CDCl}_3$ ):  $\delta$  14.3, 14.9, 23.2, 61.2, 116.9, 121.8, 122.6, 123.6, 129.5, 130.8, 131.4, 137.1, 161.0, 186.5. **HRMS** (ESI-TOF) Calcd for  $\text{C}_{16}\text{H}_{17}\text{BrNO}_3\text{S}^+$  ( $[\text{M} + \text{H}]^+$ ) 382.0107. Found 382.0101.

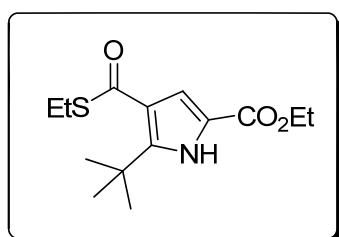

**6h**, Ethyl 5-(tert-butyl)-4-((ethylthio)carbonyl)-1*H*-pyrrole-2-carboxylate. Colorless viscous oil.  $^1\text{H NMR}$  (500 MHz,  $\text{CDCl}_3$ ):  $\delta$  1.32 (t,  $J = 7.5$  Hz, 3H), 1.37 (t,  $J = 7.0$  Hz, 3H), 1.45 (s, 9H), 2.98 (q,  $J = 7.5$  Hz, 2H), 4.33 (q,  $J = 7.0$  Hz, 2H), 7.42 (d,  $J = 2.5$  Hz, 1H), 9.07 (s, 1H).  $^{13}\text{C NMR}$  (125 MHz,  $\text{CDCl}_3$ ):  $\delta$  14.4, 15.0, 23.3, 28.3, 33.4, 60.7, 116.3, 119.2, 120.9, 147.8, 160.7, 186.9. **HRMS** (ESI-TOF) Calcd for  $\text{C}_{14}\text{H}_{22}\text{NO}_3\text{S}^+$  ( $[\text{M} + \text{H}]^+$ ) 284.1315. Found 284.1312.

\* The crude product was re-purified by flash column chromatography (silica gel, n-Hexane: EtOAc = 14 : 1, V/V)

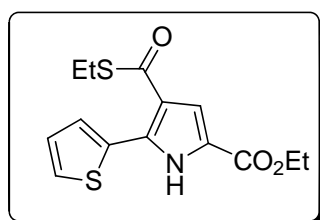

**6i**, Ethyl 4-((ethylthio)carbonyl)-5-(thiophen-2-yl)-1*H*-pyrrole-2-carboxylate. Colorless crystals. m.p. 140–141 °C.  $^1\text{H NMR}$  (500 MHz,  $\text{CDCl}_3$ ):  $\delta$  1.32 (t,  $J = 7.5$  Hz, 3H), 1.37 (t,  $J = 7.0$  Hz, 3H), 3.01 (q,  $J = 7.5$  Hz, 2H), 4.32 (q,  $J = 7.0$  Hz, 2H), 7.10–7.11 (m, 1H), 7.41–7.42 (m, 2H), 7.67 (dd,  $J_1 = 2.5$  Hz,  $J_2 = 1.5$  Hz, 1H), 9.63 (s, 1H).  $^{13}\text{C NMR}$  (125 MHz,  $\text{CDCl}_3$ ):  $\delta$  14.4, 14.9, 23.3, 61.1, 116.9, 121.5, 122.4, 127.4, 127.6, 128.9, 131.2, 131.3, 160.6, 186.3. **HRMS** (ESI-TOF) Calcd for  $\text{C}_{14}\text{H}_{16}\text{NO}_3\text{S}_2^+$  ( $[\text{M} + \text{H}]^+$ ) 310.0566. Found 310.0558.

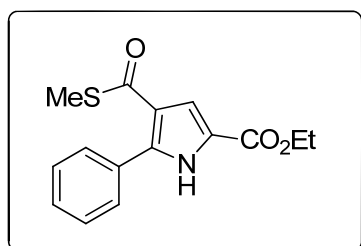

**6j**, Ethyl 4-((methylthio)carbonyl)-5-phenyl-1*H*-pyrrole-2-carboxylate. Colorless crystals. m.p. 164–165 °C.  $^1\text{H NMR}$  (500 MHz,  $\text{CDCl}_3$ ):  $\delta$  1.30 (t,  $J = 7.0$  Hz, 3H), 2.36 (s, 3H), 4.19 (q,  $J = 7.0$  Hz, 2H), 7.41–7.42 (m, 4H), 7.61–7.62 (m, 2H), 10.04 (s, 1H).  $^{13}\text{C NMR}$  (125 MHz,  $\text{CDCl}_3$ ):  $\delta$  11.5, 14.3, 61.0, 116.7, 121.5, 122.4, 128.2, 129.1, 129.2, 130.5, 138.4, 161.0, 186.7. **HRMS** (ESI-TOF) Calcd for  $\text{C}_{15}\text{H}_{16}\text{NO}_3\text{S}^+$  ( $[\text{M} + \text{H}]^+$ ) 290.0845. Found 290.0854.

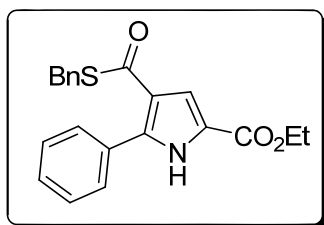

**6k**, *S*-benzyl 2-phenyl-5-tosyl-1*H*-pyrrole-3-carbothioate. Colorless crystals. m.p. 130–131 °C.  $^1\text{H NMR}$  (500 MHz,  $\text{CDCl}_3$ ):  $\delta$  1.36 (t,  $J = 7.0$  Hz, 3H), 4.23 (s, 2H), 4.32 (q,  $J = 7.0$  Hz, 2H), 7.22–7.24 (m, 1H), 7.27–7.33 (m, 4H), 7.42–7.43 (m, 1H), 7.45–7.46 (m, 3H), 7.61–7.63 (m, 2H), 9.34 (s, 1H).  $^{13}\text{C NMR}$  (125 MHz,  $\text{CDCl}_3$ ):  $\delta$  14.3, 33.0, 61.0, 116.9, 121.1, 122.5, 127.1, 128.3, 128.5, 128.9, 129.1, 129.3, 130.5, 137.8, 138.7, 161.0, 185.5. **HRMS** (ESI-TOF) Calcd for  $\text{C}_{21}\text{H}_{20}\text{NO}_3\text{S}^+$  ( $[\text{M} + \text{H}]^+$ ) 366.1158. Found 366.1159.

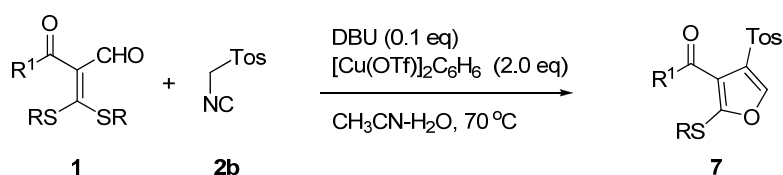

**General procedure for the synthesis of 7 (7a as an example):**

To the mixture of **1a** (140.1 mg, 0.50 mmol) and TosMIC **2b** (105.8 mg, 0.55 mmol) in  $\text{CH}_3\text{CN}$  (2 mL) was added 1,8-diazabicyclo[5.4.0.]undec-7-ene (DBU, 7.5  $\mu\text{L}$ , 0.05 mmol) in one portion at room temperature. The mixture was stirred for about 15 min for the formation of **3n** as indicated by TLC. Then,  $\text{H}_2\text{O}$  (200  $\mu\text{L}$ , 5.6 mmol) and  $[\text{Cu}(\text{OTf})_2]\cdot\text{C}_6\text{H}_6$  (504 mg, 1.00 mmol) were added at 70 °C and the reaction mixture was stirred at 70 °C for about 24.0 h. Then the resulting mixture was poured into water (15 mL) and extracted with dichloromethane (15 mL  $\times$  3). The combined organic phase was dried over anhydrous  $\text{MgSO}_4$  and concentrated *in vacuo*. The crude product was purified by flash column chromatography (silica gel, petroleum ether: EtOAc = 15 : 1, V/V) to give **5a** (96.5 mg, 50%).

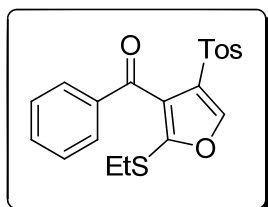

**7a**, (2-(ethylthio)-4-tosylfuran-3-yl)(phenyl)methanone. Colorless crystals. m.p. 155–156 °C.  $^1\text{H NMR}$  (500 MHz,  $\text{CDCl}_3$ ):  $\delta$  1.18 (t,  $J = 7.5$  Hz, 3H), 2.40 (s, 3H), 2.79 (q,  $J = 7.5$  Hz, 2H), 7.27 (d,  $J = 7.5$  Hz, 2H), 7.42 (t,  $J = 7.0$  Hz, 2H), 7.59 (t,  $J = 7.0$  Hz, 1H), 7.73 (d,  $J = 7.5$  Hz, 2H), 7.79 (d,  $J = 7.5$  Hz, 2H), 8.17 (s, 1H).  $^{13}\text{C NMR}$  (125 MHz,  $\text{CDCl}_3$ ):  $\delta$  15.2, 21.6, 29.4, 125.4, 128.2, 128.5, 129.6, 129.8, 131.0, 133.7, 137.3, 137.9, 144.6, 147.8, 151.0,

189.0. **HRMS** (ESI-TOF) Calcd for  $C_{20}H_{19}O_4S_2^+$  ( $[M + H]^+$ ) 387.0719. Found 387.0722.

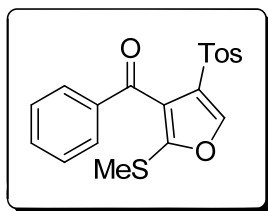

**7b**, (2-(methylthio)-4-tosylfuran-3-yl)(phenyl)methanone. Colorless crystals. m.p. 164–165 °C.  **$^1H$  NMR** (500 MHz,  $CDCl_3$ ):  $\delta$  2.34 (s, 3H), 2.41 (s, 3H), 7.29 (d,  $J = 8.0$  Hz, 2H), 7.44 (t,  $J = 8.0$  Hz, 2H), 7.59 (t,  $J = 8.0$  Hz, 1H), 7.74 (d,  $J = 8.5$  Hz, 2H), 7.83 (d,  $J = 8.5$  Hz, 2H), 8.18 (s, 1H).  **$^{13}C$  NMR** (125 MHz,  $CDCl_3$ ):  $\delta$  17.0, 21.7, 123.6, 128.3, 128.5, 129.5, 129.6, 131.1, 133.7, 137.3, 137.8, 144.6, 148.6, 152.4, 188.8. **HRMS** (ESI-TOF) Calcd for  $C_{19}H_{17}O_4S_2^+$  ( $[M + H]^+$ ) 373.0563. Found 373.0567.

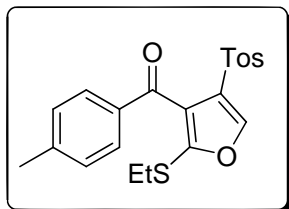

**7c**, (2-(ethylthio)-4-tosylfuran-3-yl)(p-tolyl)methanone. Colorless crystals. m.p. 86–87 °C.  **$^1H$  NMR** (500 MHz,  $CDCl_3$ ):  $\delta$  1.18 (t,  $J = 7.5$  Hz, 3H), 2.39 (s, 3H), 2.42 (s, 3H), 2.78 (q,  $J = 7.5$  Hz, 2H), 7.21 (d,  $J = 8.0$  Hz, 2H), 7.25–7.27 (m, 2H), 7.63 (d,  $J = 8.0$  Hz, 2H), 7.78 (d,  $J = 8.5$  Hz, 2H), 8.16 (s, 1H).  **$^{13}C$  NMR** (125 MHz,  $CDCl_3$ ):  $\delta$  15.2, 21.6, 21.8, 29.4, 125.6, 128.1, 129.2, 129.5, 129.9, 130.9, 134.7, 137.9, 144.5, 144.9, 148.6, 150.6, 188.5. **HRMS** (ESI-TOF) Calcd for  $C_{21}H_{21}O_4S_2^+$  ( $[M + H]^+$ ) 401.0876. Found 401.0879.

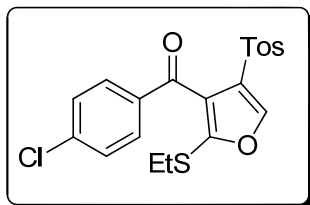

**7d**, (4-chlorophenyl)(2-(ethylthio)-4-tosylfuran-3-yl)methanone. Colorless crystals. m.p. 136–137 °C.  **$^1H$  NMR** (500 MHz,  $CDCl_3$ ):  $\delta$  1.19 (t,  $J = 7.5$  Hz, 3H), 2.41 (s, 3H), 2.81 (q,  $J = 7.5$  Hz, 2H), 7.28 (d,  $J = 8.0$  Hz, 2H), 7.38 (d,  $J = 8.0$  Hz, 2H), 7.66 (d,  $J = 8.5$  Hz, 2H), 7.77 (d,  $J = 8.5$  Hz, 2H), 8.17 (s, 1H).  **$^{13}C$  NMR** (125 MHz,  $CDCl_3$ ):  $\delta$  15.2, 21.6, 29.4, 124.9, 128.1, 128.8, 129.6, 130.9, 131.1, 135.5, 137.7, 140.4, 144.7, 148.7, 151.3, 187.7. **HRMS** (ESI-TOF) Calcd for  $C_{20}H_{18}ClO_4S_2^+$  ( $[M + H]^+$ ) 421.0330. Found 421.0337.

### III . Crystal data and ORTEP drawings of compound 4a, 5a, 6a and 7b.

Single-crystal X-ray diffraction data was collected at room temperature on a Oxford Diffraction Gemini R Ultra diffractometer, the X-ray generator using Mo-K $\alpha$  ( $\lambda = 0.71073 \text{ \AA}$ ) radiation with a  $\omega$  scan technique. The crystal structures were solved by direct method of SHELXS-97<sup>3</sup> and refined by full-matrix least-squares techniques using the SHELXL-97 program. Non-hydrogen atoms were refined anisotropic.

#### (1) Crystal data and ORTEP drawing of compound 4a (CCDC 949219)

ORTEP drawing:

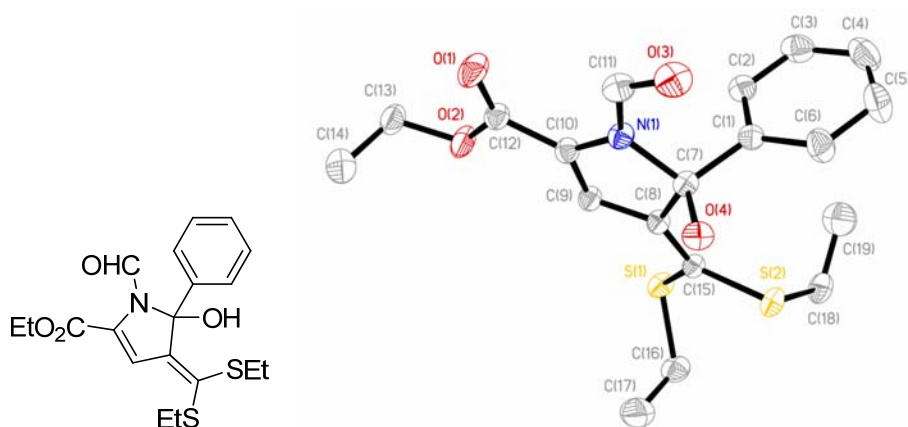

Crystal data:

|                                            |                                                                |
|--------------------------------------------|----------------------------------------------------------------|
| Empirical formula                          | C <sub>19</sub> H <sub>23</sub> NO <sub>4</sub> S <sub>2</sub> |
| Formula weight                             | 393.50                                                         |
| Crystal system                             | Triclinic                                                      |
| Space group                                | P -1                                                           |
| a (Å)                                      | 8.6230(6)                                                      |
| b (Å)                                      | 10.8704(7)                                                     |
| c (Å)                                      | 10.8806(7)                                                     |
| $\alpha$ (deg)                             | 81.701(1)                                                      |
| $\beta$ (deg)                              | 86.189(1)                                                      |
| $\gamma$ (deg)                             | 78.490(1)                                                      |
| Volume (Å <sup>3</sup> )                   | 988.18(11)                                                     |
| Z                                          | 2                                                              |
| Calculated density (mg/m <sup>3</sup> )    | 1.32                                                           |
| Absorption coefficient (mm <sup>-1</sup> ) | 0.293                                                          |
| F(000)                                     | 416.0                                                          |
| Theta range for data collection (deg)      | 1.9 to 26.0                                                    |
| Reflections collected/unique               | 5443/3829                                                      |
| Goodness-of-fit on F <sup>2</sup>          | 1.024                                                          |
| Final R indices [ $I > 2\sigma(I)$ ]       | R1=0.044, WR2 = 0.111                                          |

(3) G. M. Sheldrick, *SHELXS-97, Programs for X-ray Crystal Structure Solution*, University of Göttingen, Göttingen, Germany, 1997.

---

R indices (all data)

R1=0.052, WR2 =0.117

---

(2) Crystal data and ORTEP drawing of compound **5a** (CCDC 949218)

ORTEP drawing:

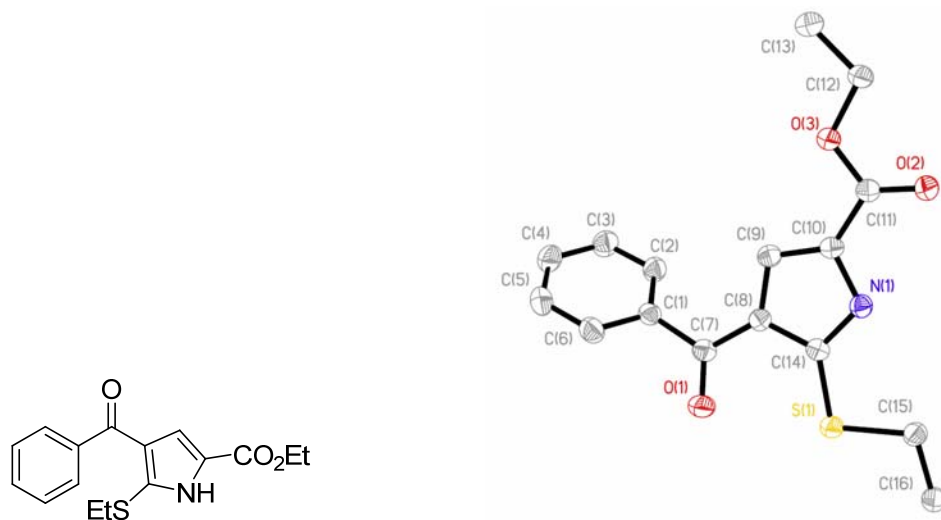

Crystal data:

---

|                                            |                                                   |
|--------------------------------------------|---------------------------------------------------|
| Empirical formula                          | C <sub>16</sub> H <sub>17</sub> NO <sub>3</sub> S |
| Formula weight                             | 303.4                                             |
| Crystal system                             | Monoclinic                                        |
| Space group                                | P 21/c                                            |
| a (Å)                                      | 15.908(4)                                         |
| b (Å)                                      | 5.9035(14)                                        |
| c (Å)                                      | 16.411(4)                                         |
| $\alpha$ (deg)                             | 90.00                                             |
| $\beta$ (deg)                              | 102.783(4)                                        |
| $\gamma$ (deg)                             | 90.00                                             |
| Volume (Å <sup>3</sup> )                   | 1503.0(6)                                         |
| Z                                          | 4                                                 |
| Calculated density (mg/m <sup>3</sup> )    | 1.34                                              |
| Absorption coefficient (mm <sup>-1</sup> ) | 0.225                                             |
| F(000)                                     | 639.9                                             |
| Theta range for data collection (deg)      | 2.5 to 26.0                                       |
| Reflections collected/unique               | 9166/2954                                         |
| Goodness-of-fit on F <sup>2</sup>          | 1.026                                             |
| Final R indices [ $I > 2\sigma(I)$ ]       | R1=0.042, WR2 = 0.098                             |
| R indices (all data)                       | R1=0.062, WR2 =0.108                              |

---



(3) Crystal data and ORTEP drawing of compound **6a** (CCDC 949220)

ORTEP drawing:

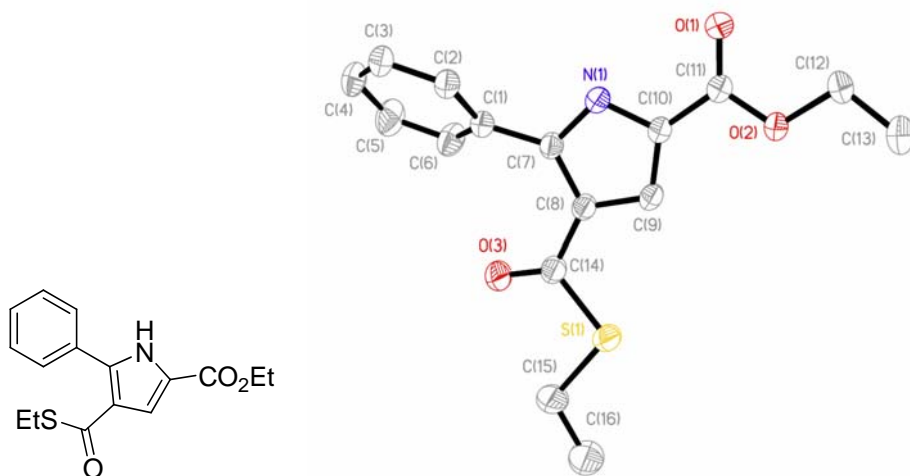

Crystal data:

|                                            |                                                   |
|--------------------------------------------|---------------------------------------------------|
| Empirical formula                          | C <sub>16</sub> H <sub>17</sub> NO <sub>3</sub> S |
| Formula weight                             | 303.4                                             |
| Crystal system                             | Triclinic                                         |
| Space group                                | P - 1                                             |
| a (Å)                                      | 8.094(2)                                          |
| b (Å)                                      | 9.747(3)                                          |
| c (Å)                                      | 10.514(3)                                         |
| $\alpha$ (deg)                             | 76.657(5)                                         |
| $\beta$ (deg)                              | 81.203(6)                                         |
| $\gamma$ (deg)                             | 78.138(5)                                         |
| Volume (Å <sup>3</sup> )                   | 785.0(4)                                          |
| Z                                          | 2                                                 |
| Calculated density (mg/m <sup>3</sup> )    | 1.28                                              |
| Absorption coefficient (mm <sup>-1</sup> ) | 0.215                                             |
| F(000)                                     | 320.0                                             |
| Theta range for data collection (deg)      | 2.0 to 26.0                                       |
| Reflections collected/unique               | 4281/3015                                         |
| Goodness-of-fit on F <sup>2</sup>          | 1.028                                             |
| Final R indices [ $I > 2\sigma(I)$ ]       | R1=0.063, WR2 = 0.148                             |
| R indices (all data)                       | R1=0.090, WR2 =0.168                              |

(4) Crystal data and ORTEP drawing of compound **7b** (CCDC 965705)

ORTEP drawing:

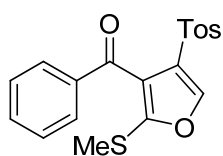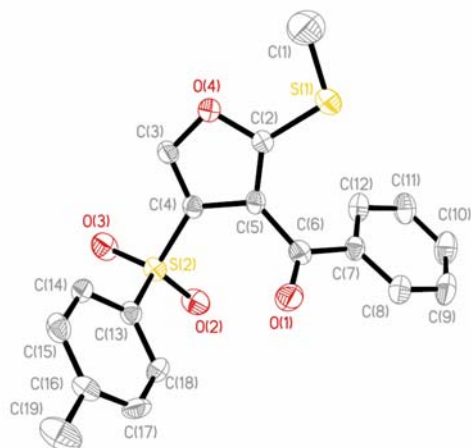

Crystal data:

---

|                                            |                                                               |
|--------------------------------------------|---------------------------------------------------------------|
| Empirical formula                          | C <sub>19</sub> H <sub>16</sub> O <sub>4</sub> S <sub>2</sub> |
| Formula weight                             | 372.44                                                        |
| Crystal system                             | Monoclinic                                                    |
| Space group                                | P 21/c                                                        |
| a (Å)                                      | 13.510 (4)                                                    |
| b (Å)                                      | 8.068(3)                                                      |
| c (Å)                                      | 17.081(5)                                                     |
| $\alpha$ (deg)                             | 90                                                            |
| $\beta$ (deg)                              | 107.751(6)                                                    |
| $\gamma$ (deg)                             | 90                                                            |
| Volume (Å <sup>3</sup> )                   | 1773.2(10)                                                    |
| Z                                          | 4                                                             |
| Calculated density (mg/m <sup>3</sup> )    | 1.395                                                         |
| Absorption coefficient (mm <sup>-1</sup> ) | 0.321                                                         |
| F(000)                                     | 776.0                                                         |
| Theta range for data collection (deg)      | 2.8 to 25.0                                                   |
| Reflections collected/unique               | 7945/3032                                                     |
| Goodness-of-fit on F <sup>2</sup>          | 0.863                                                         |
| Final R indices [ $I > 2\sigma(I)$ ]       | R1=0.068, WR2 = 0.179                                         |
| R indices (all data)                       | R1=0.131, WR2 =0.234                                          |

---

#### IV. Copies of $^1\text{H}$ NMR and $^{13}\text{C}$ NMR spectra

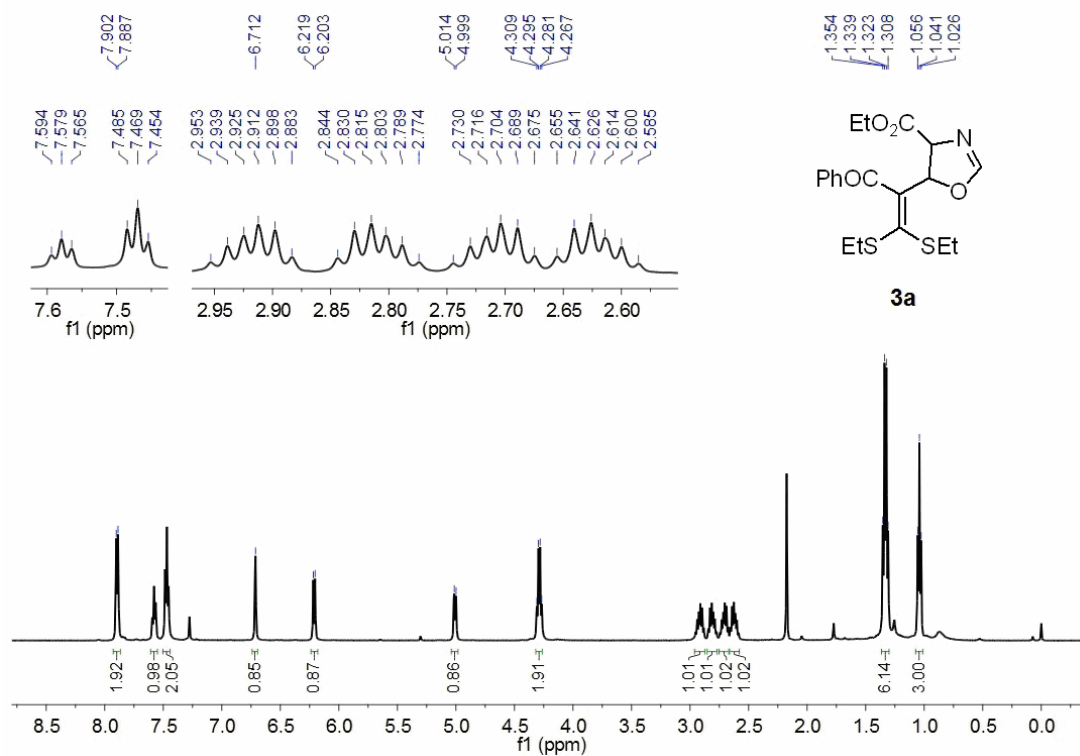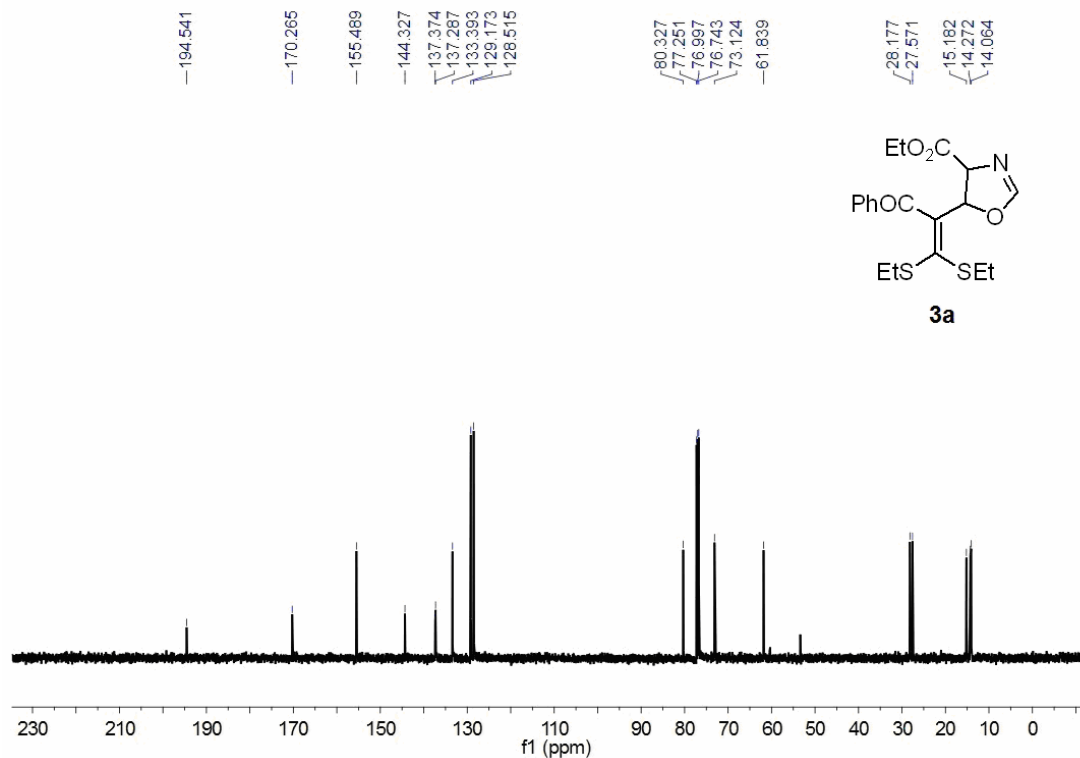

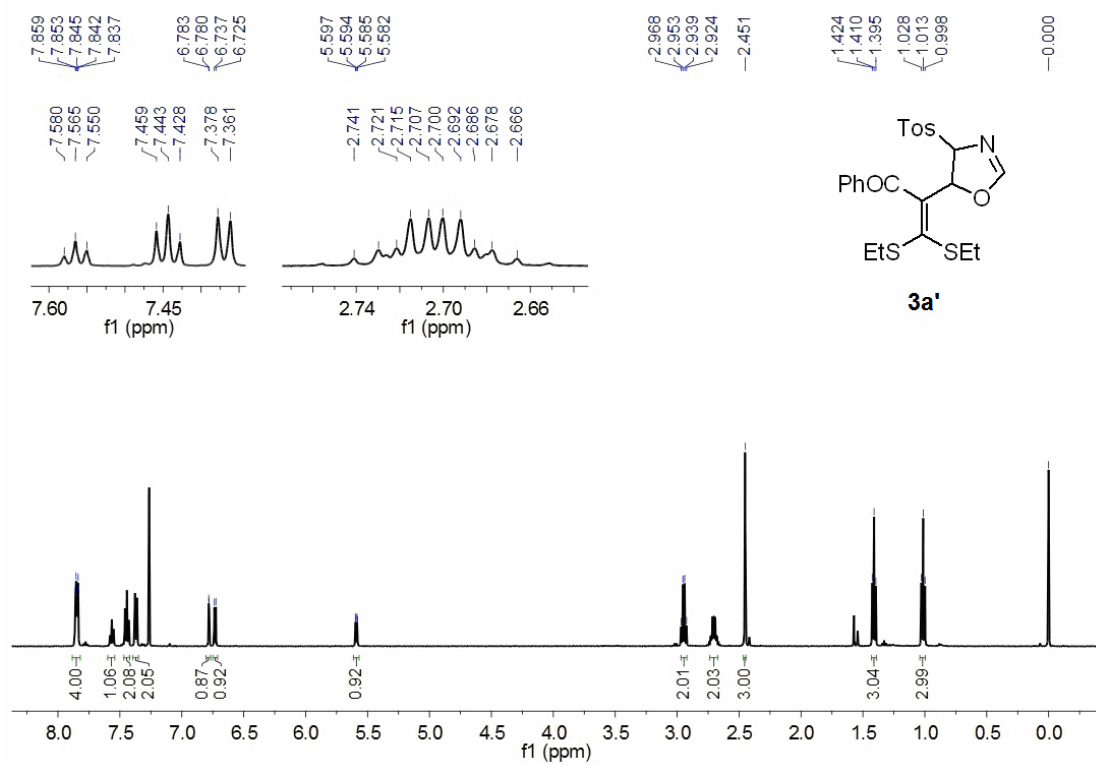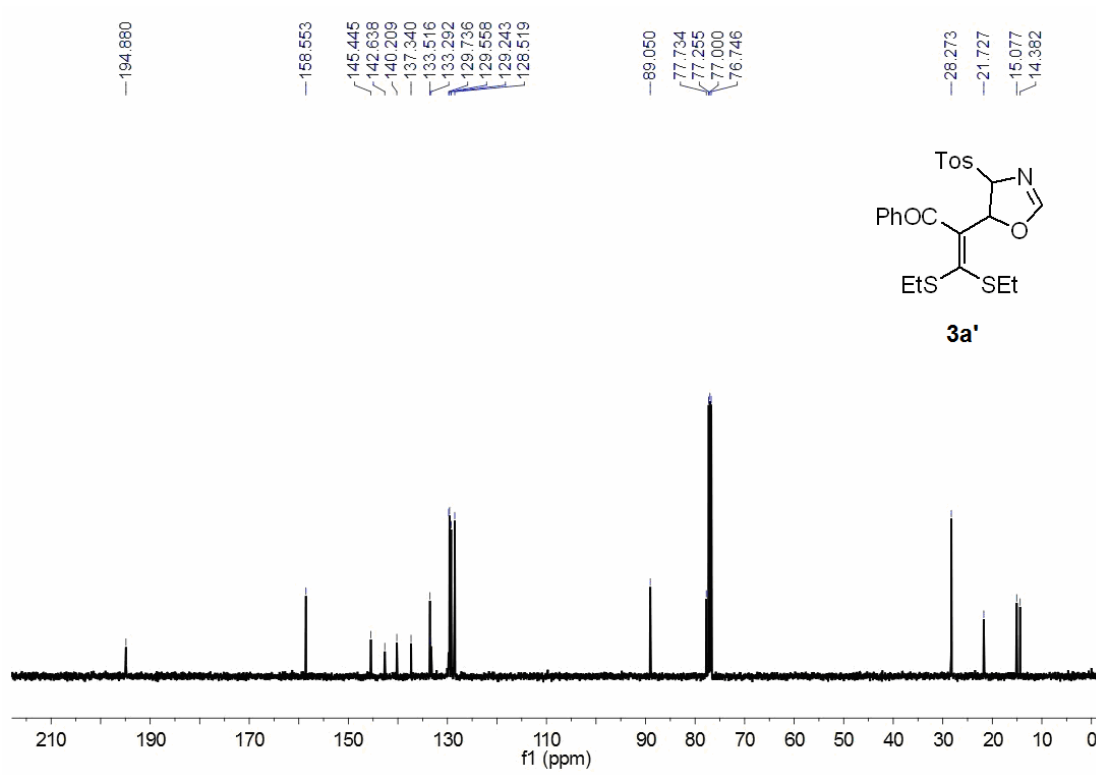

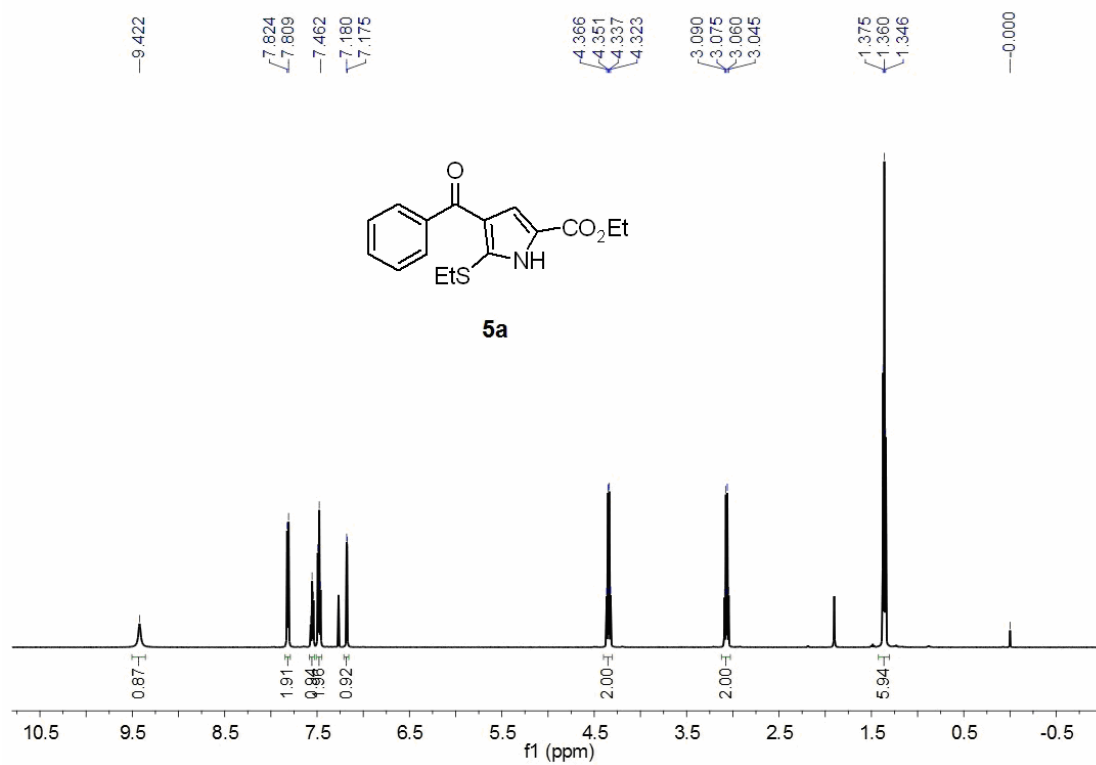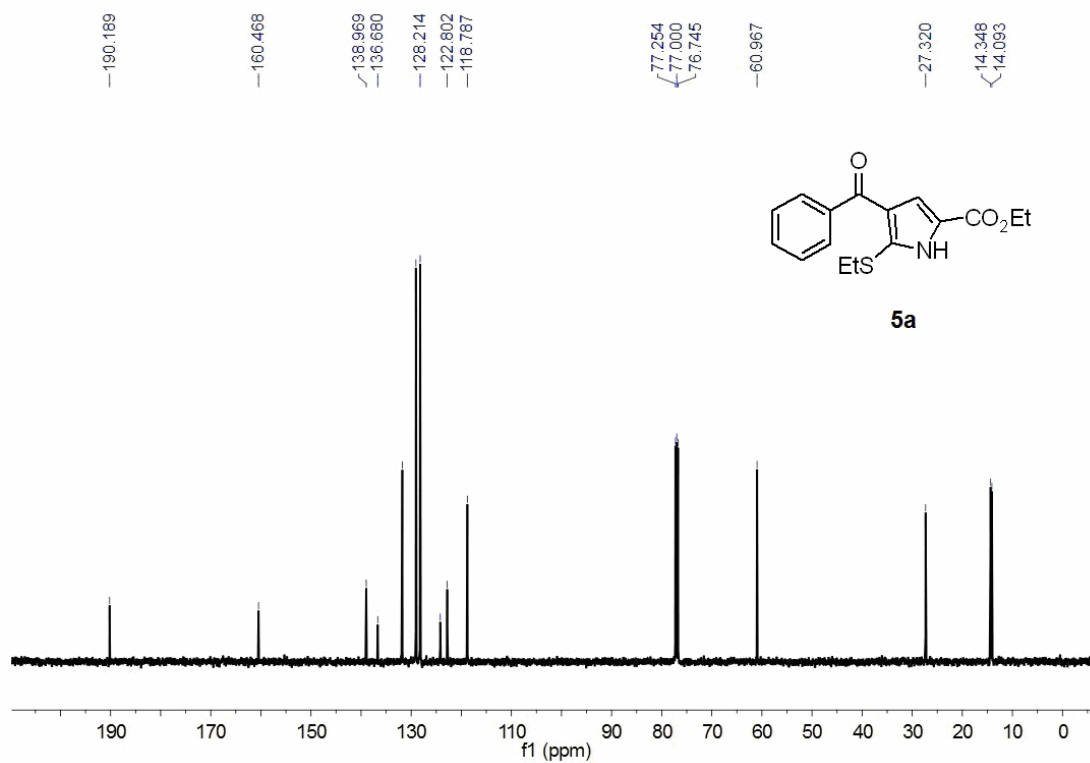

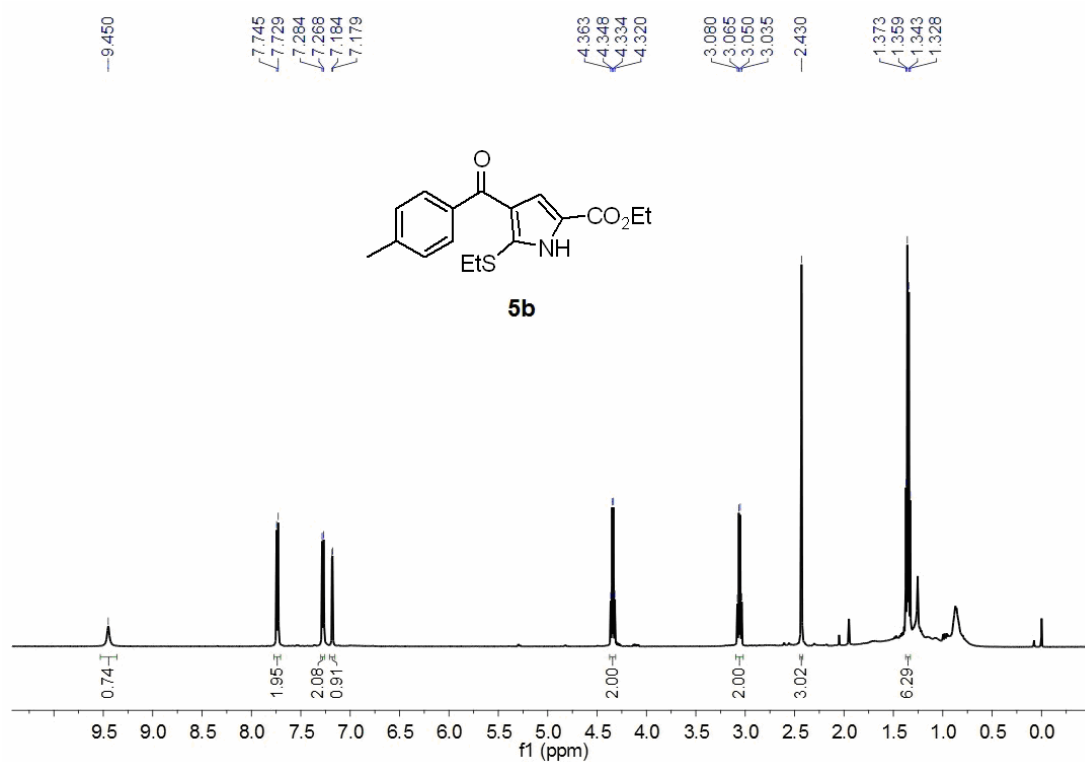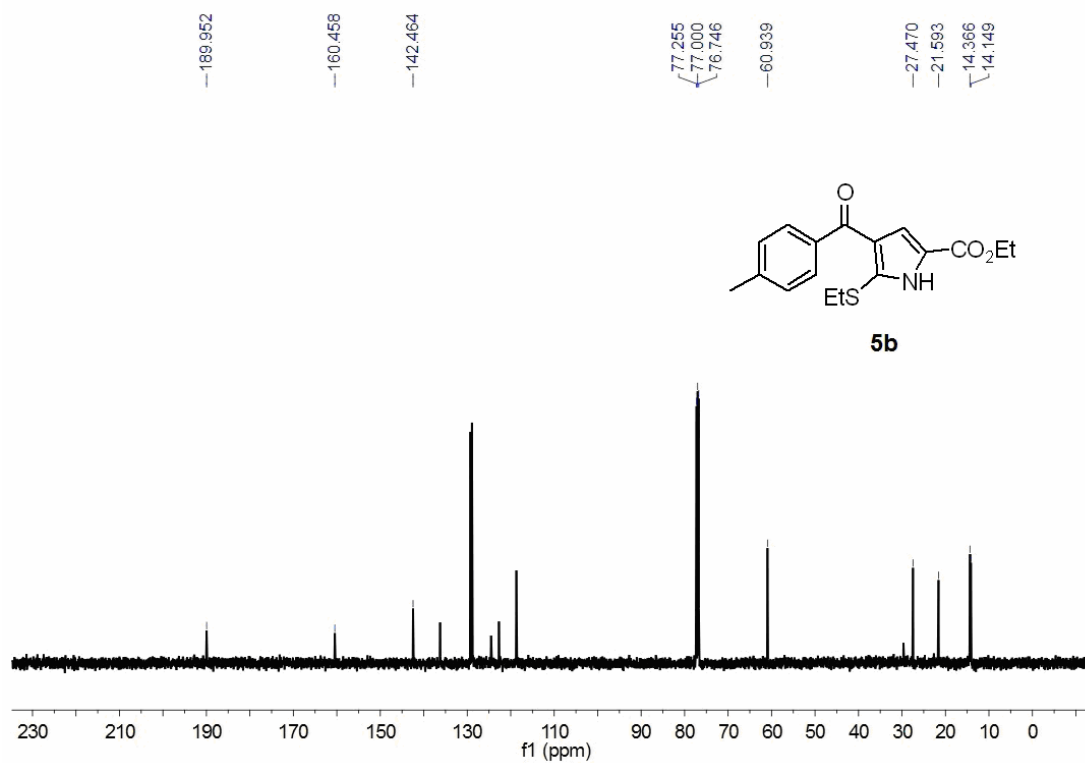

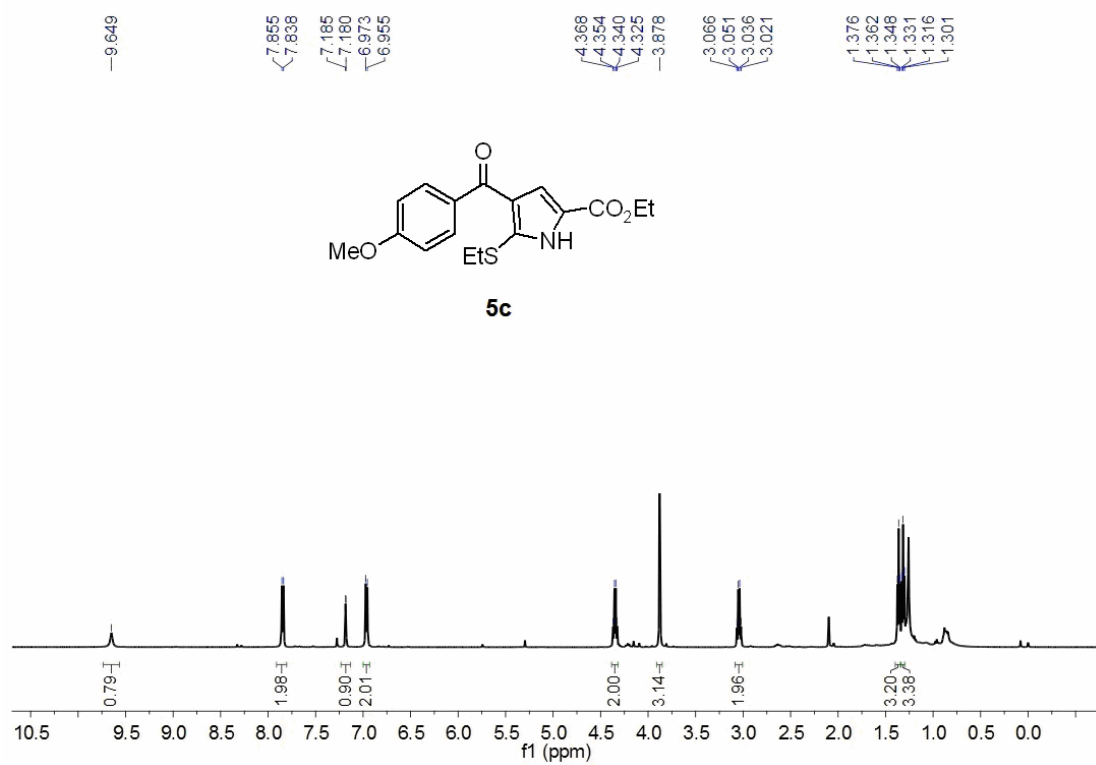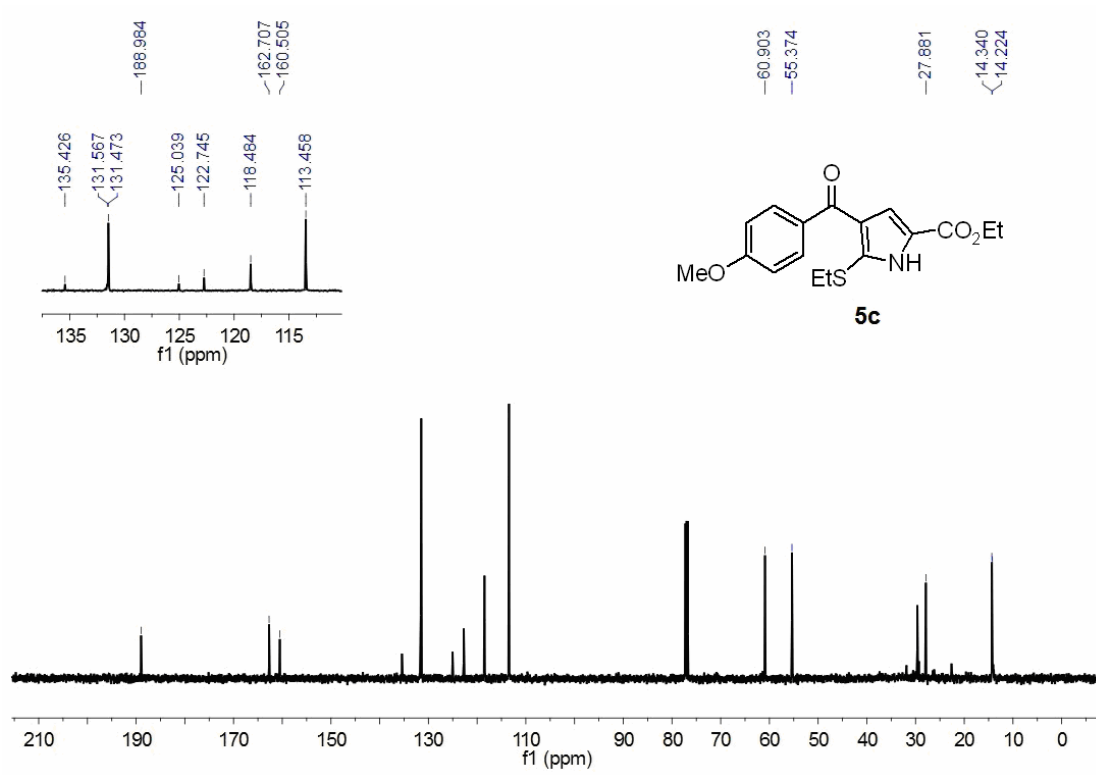

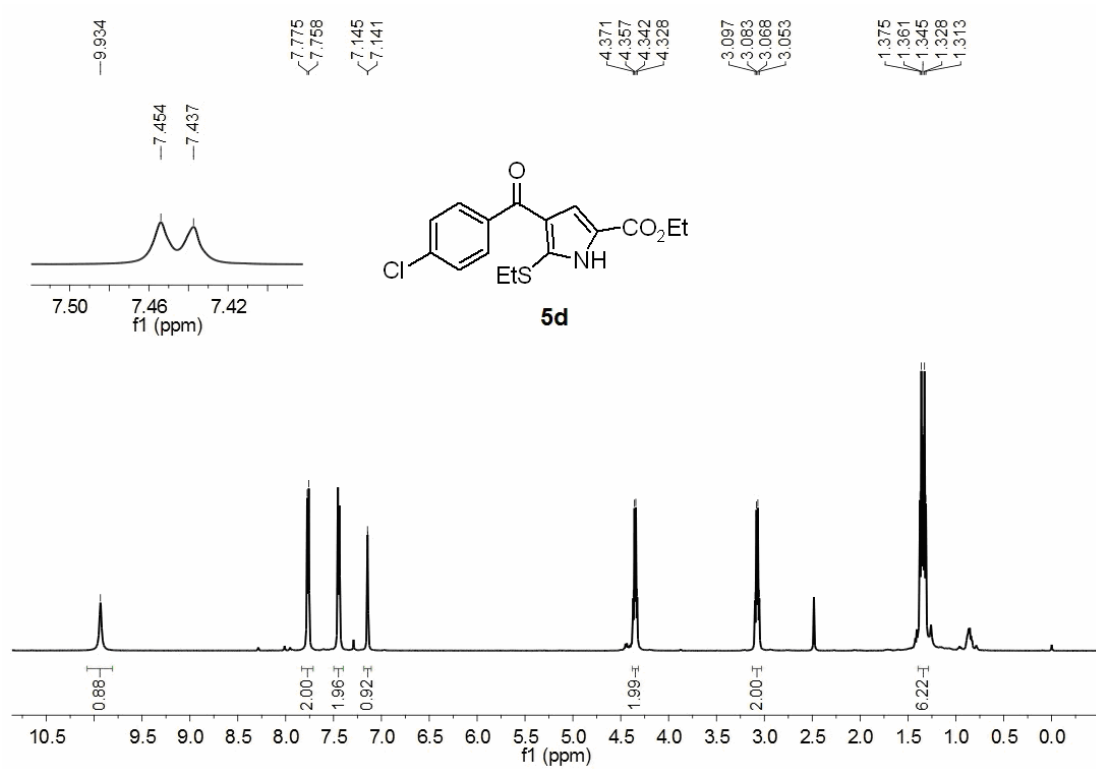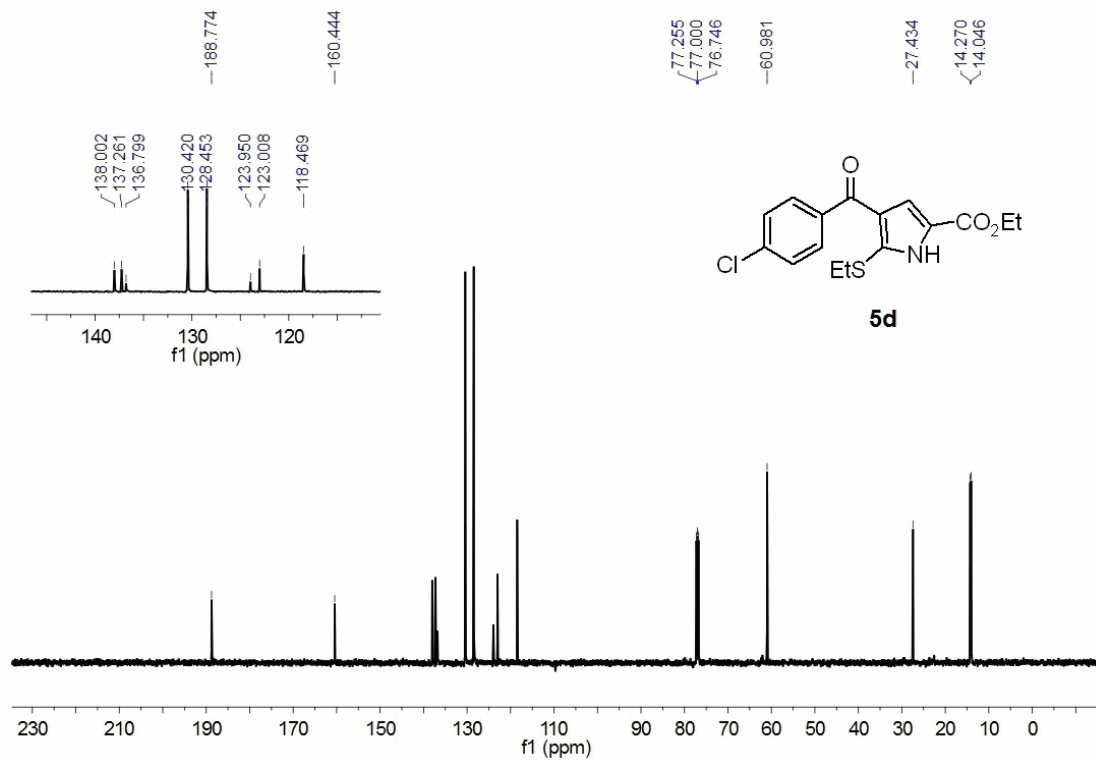



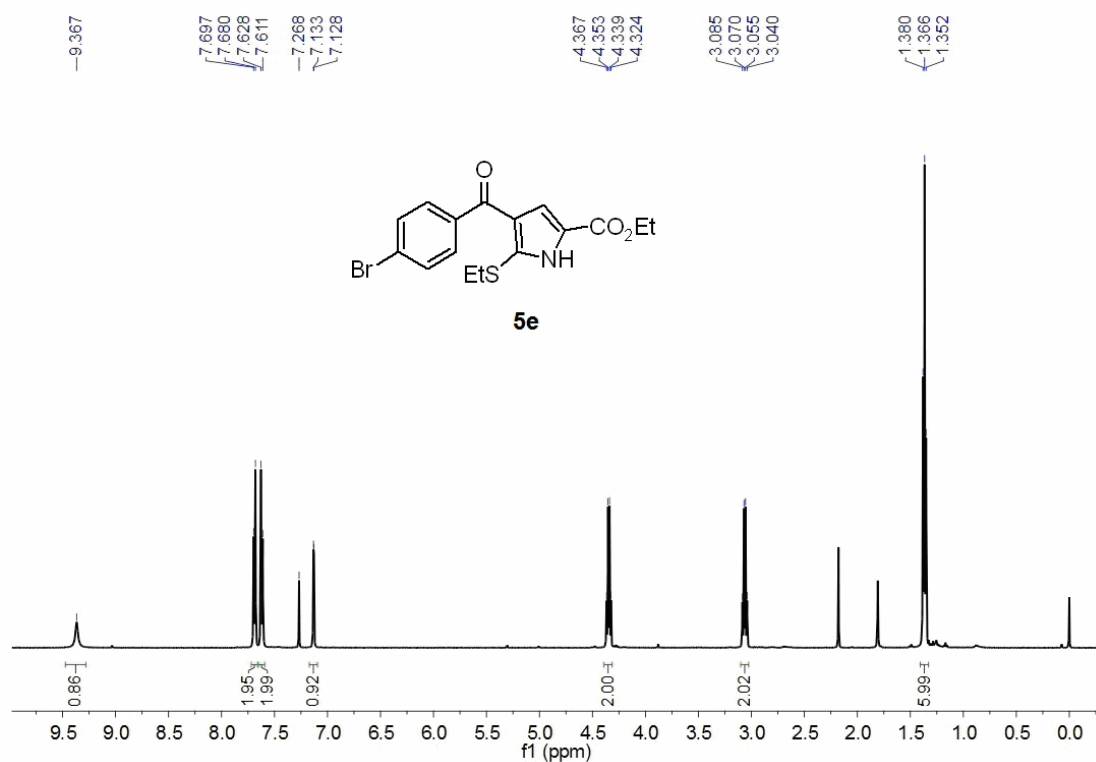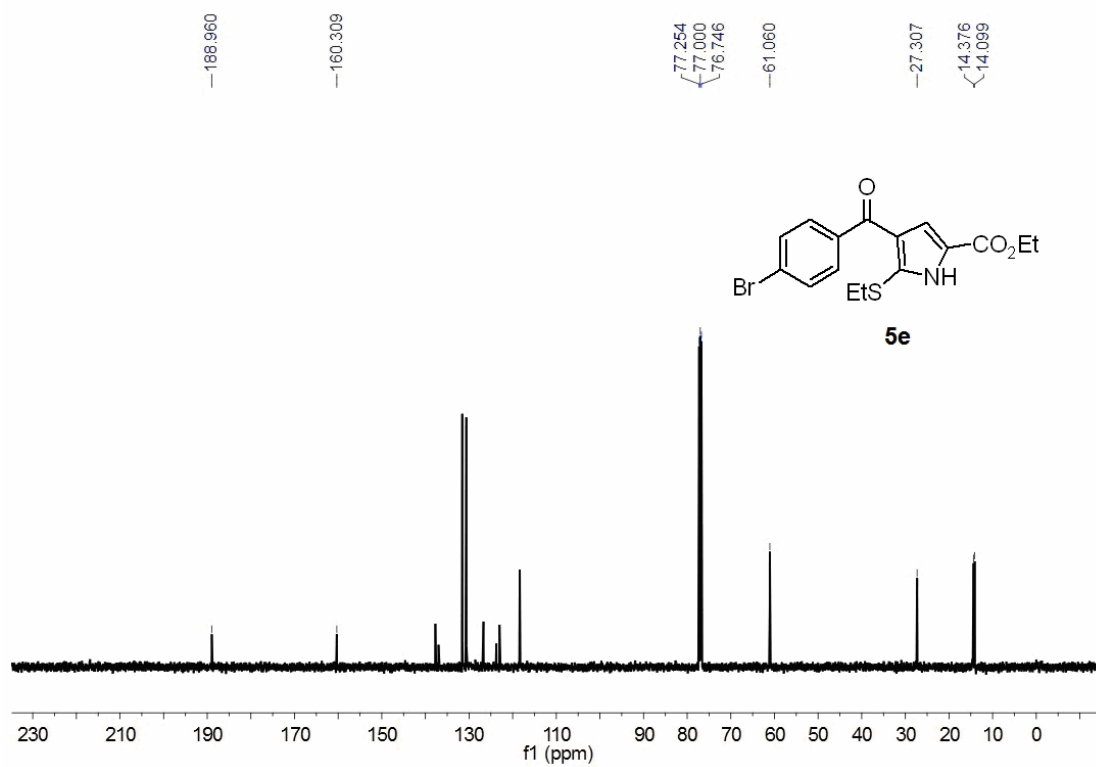

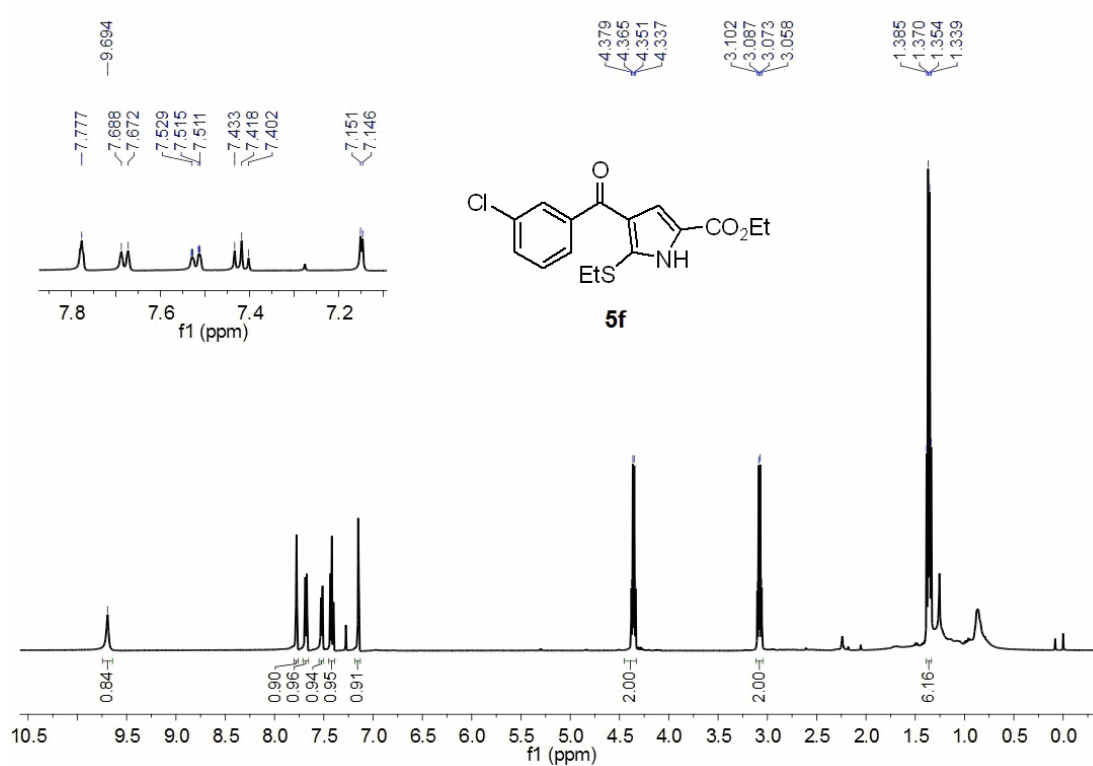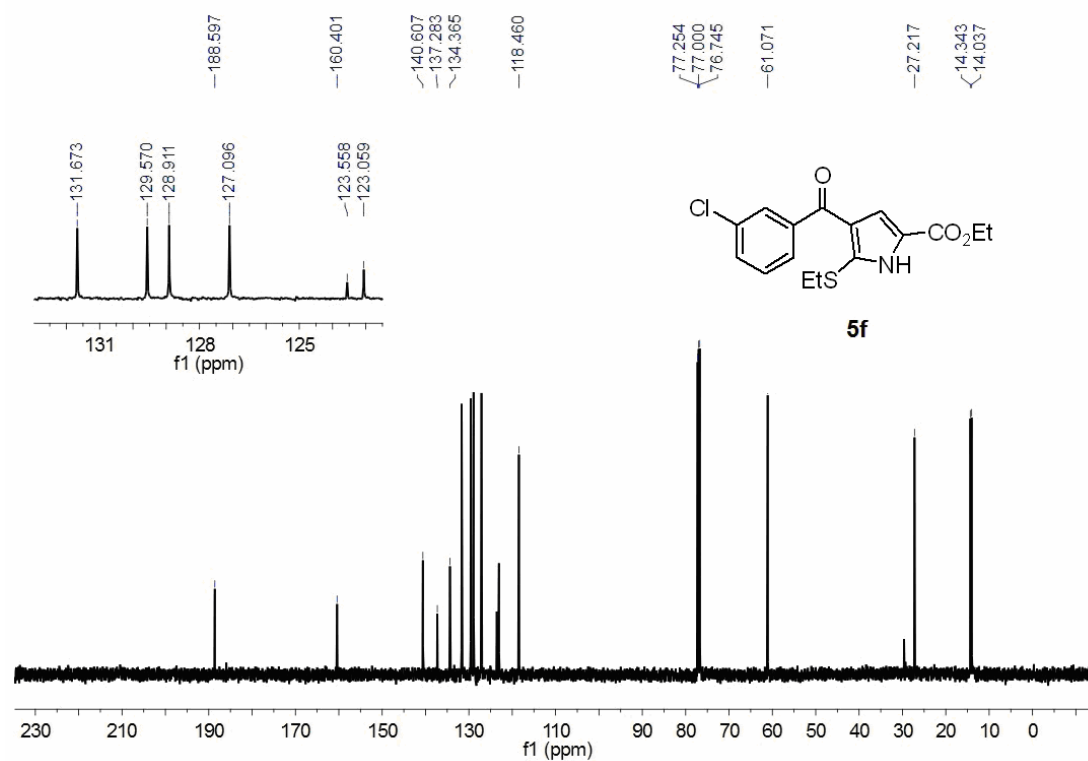

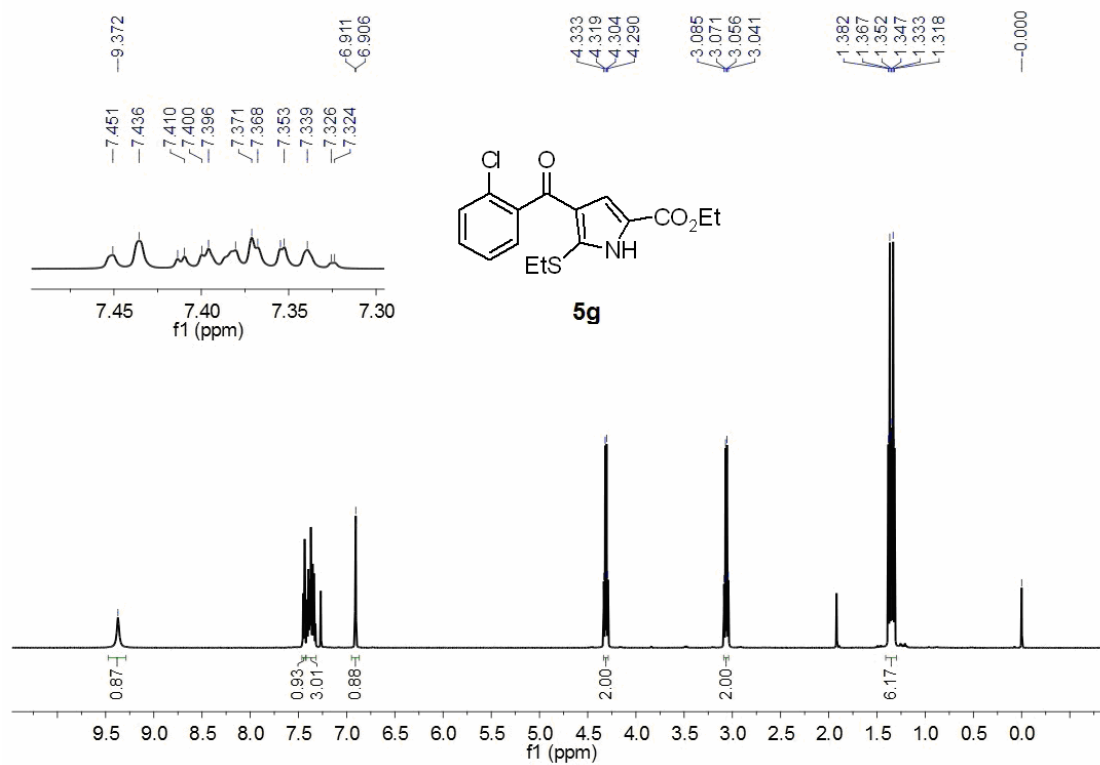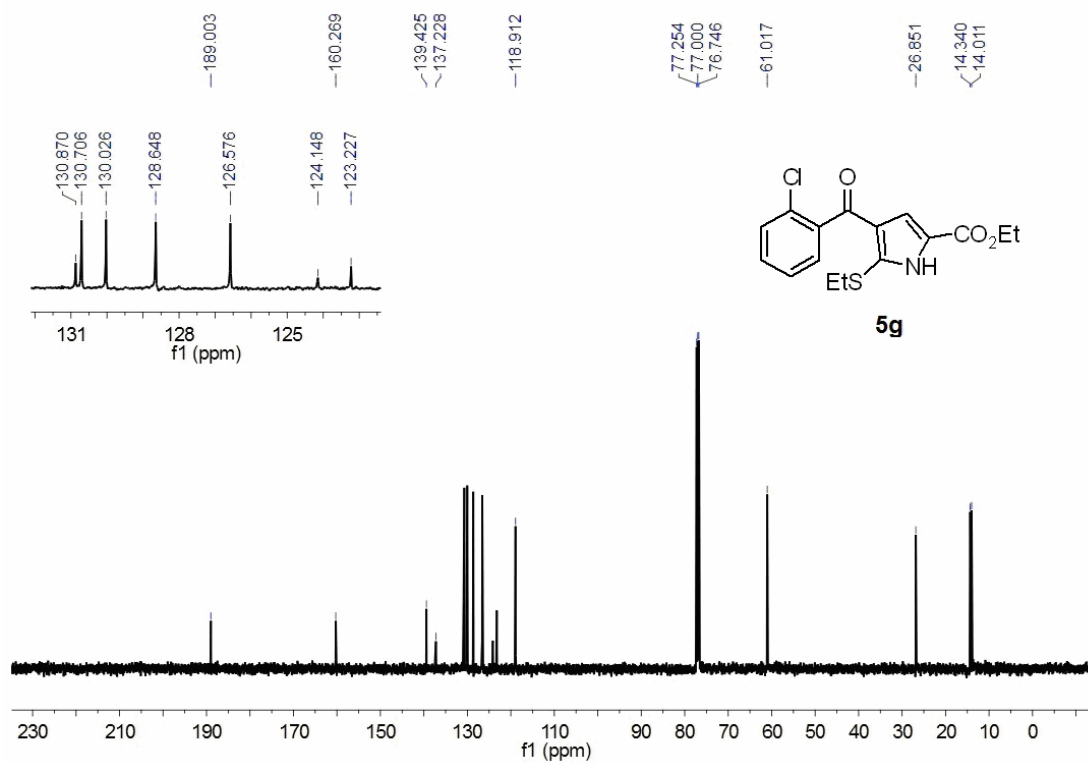

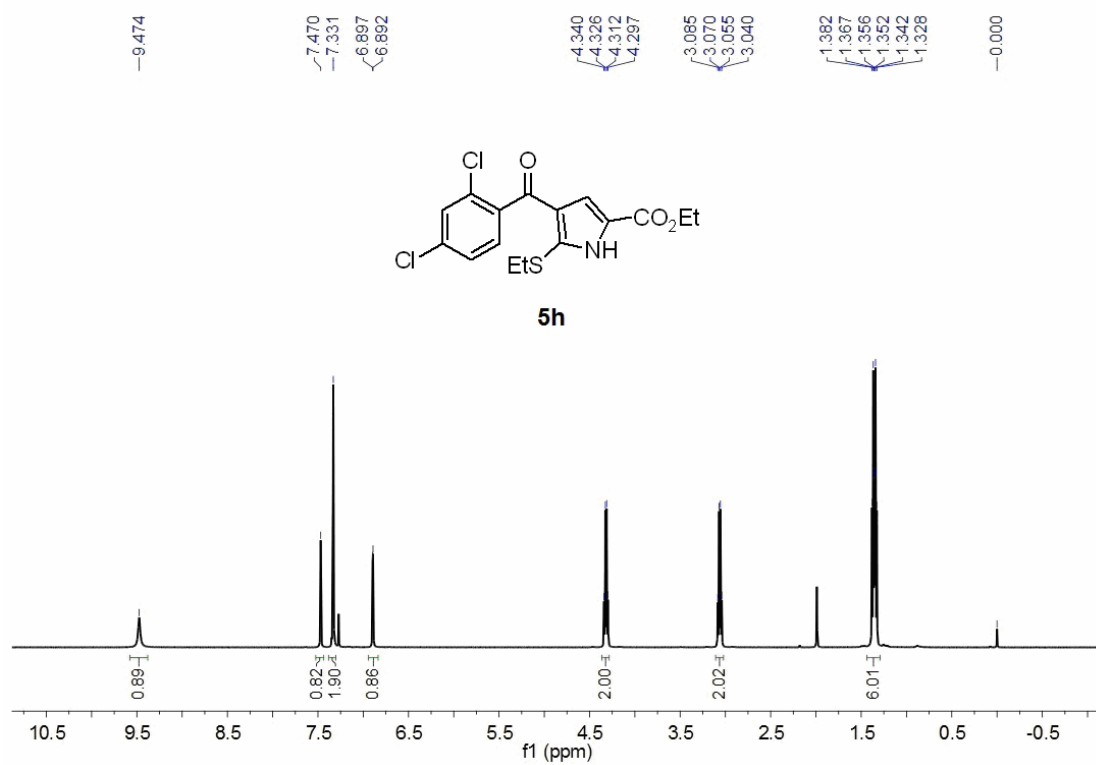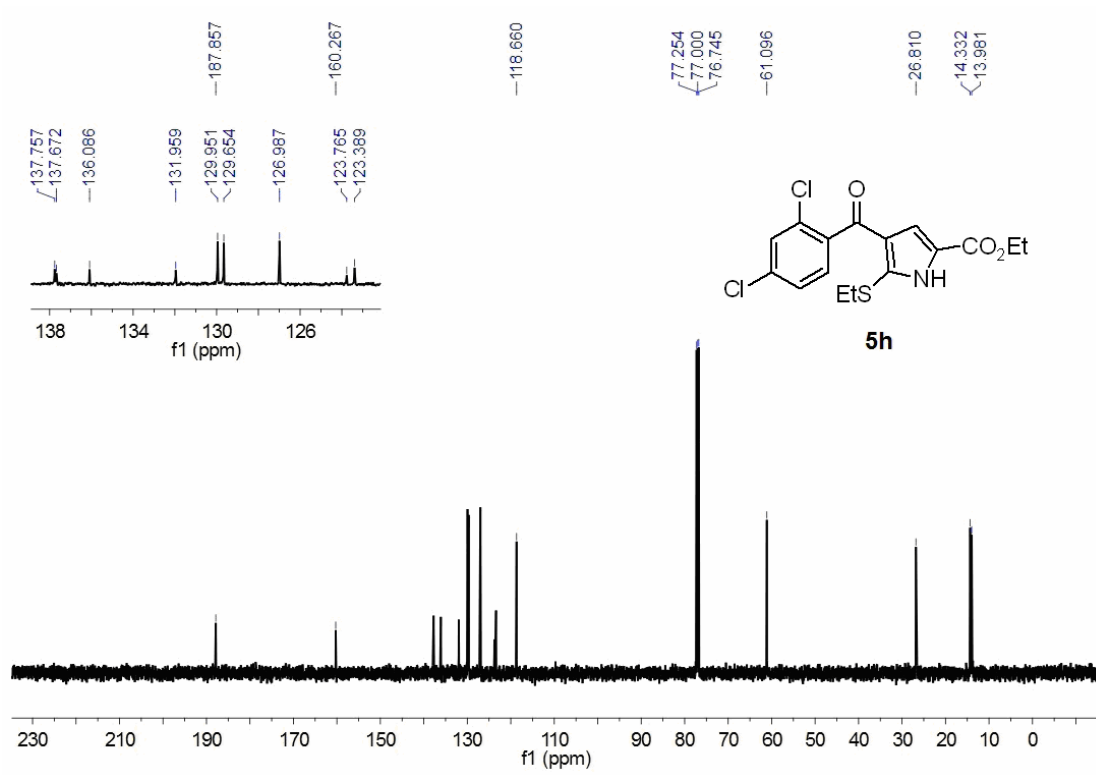

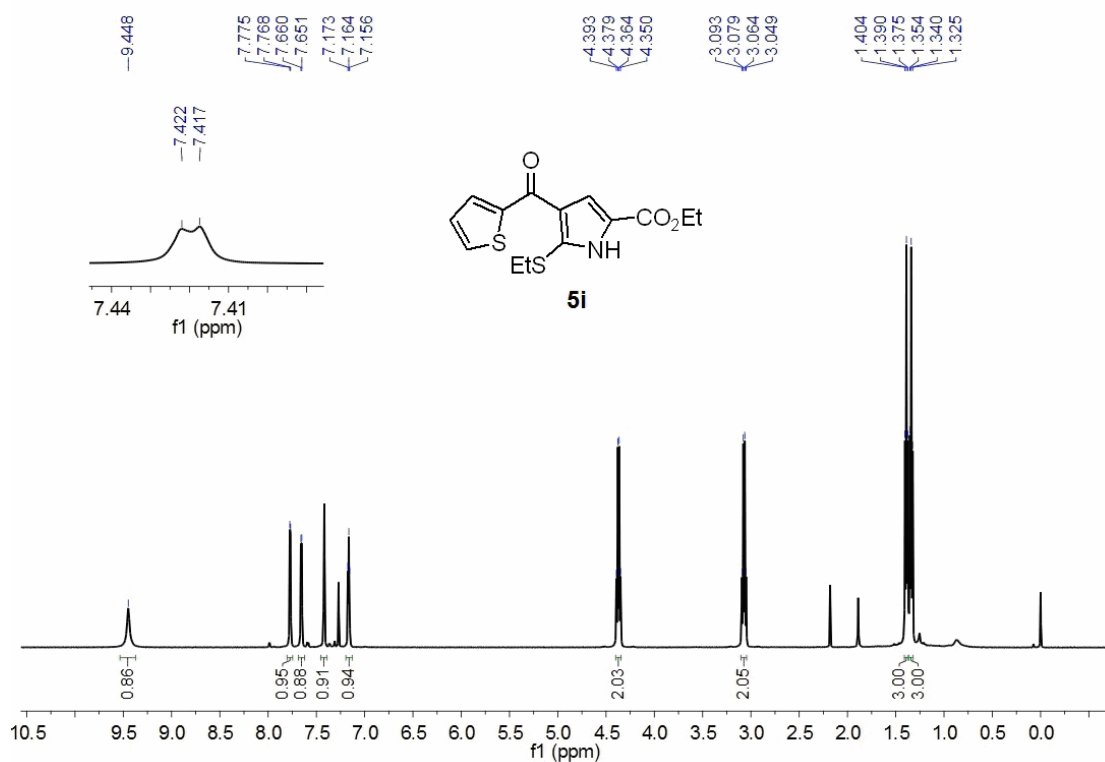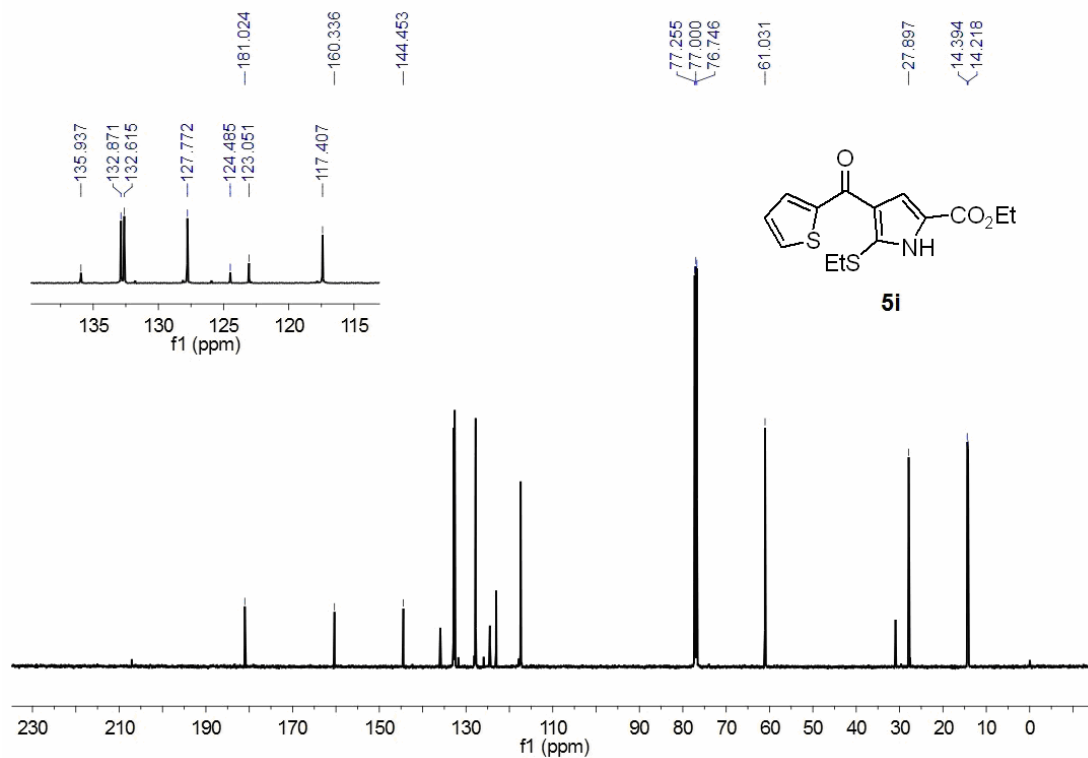

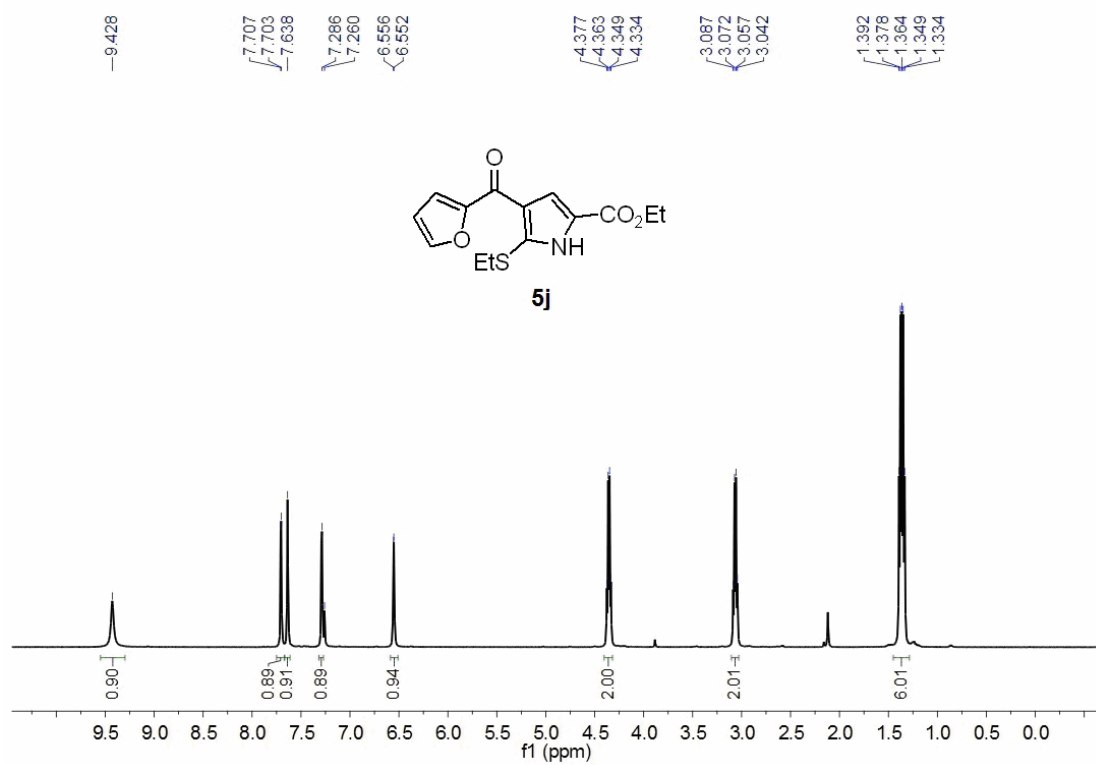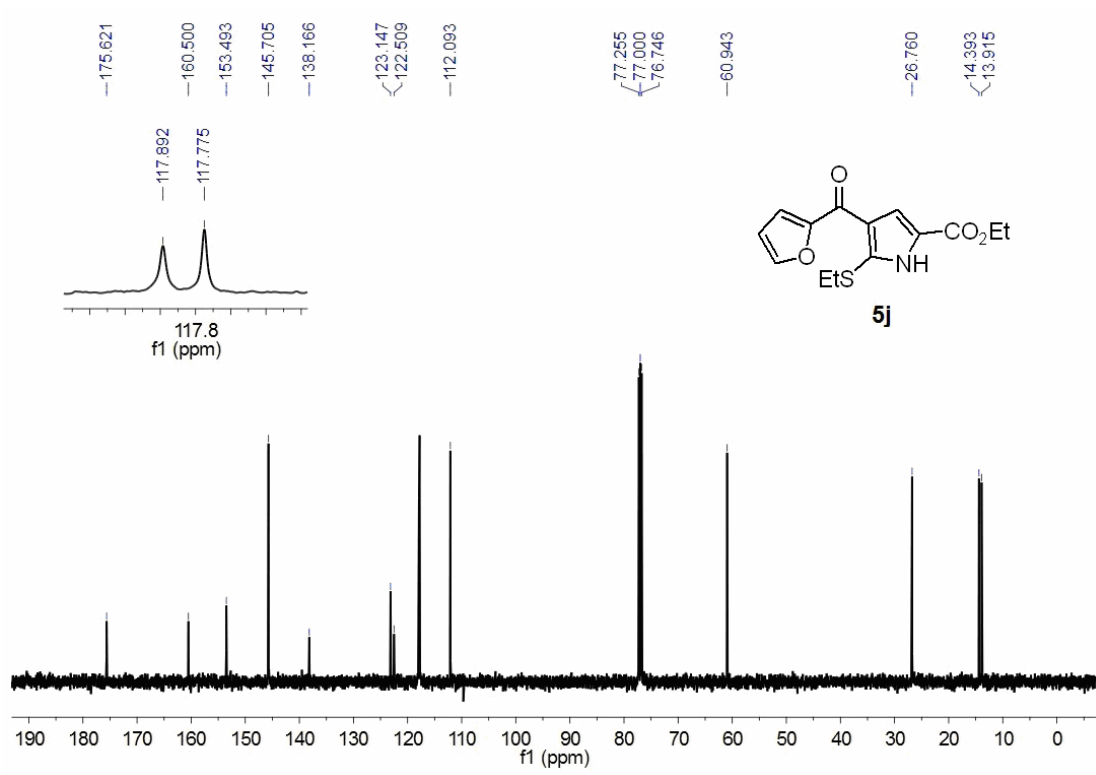

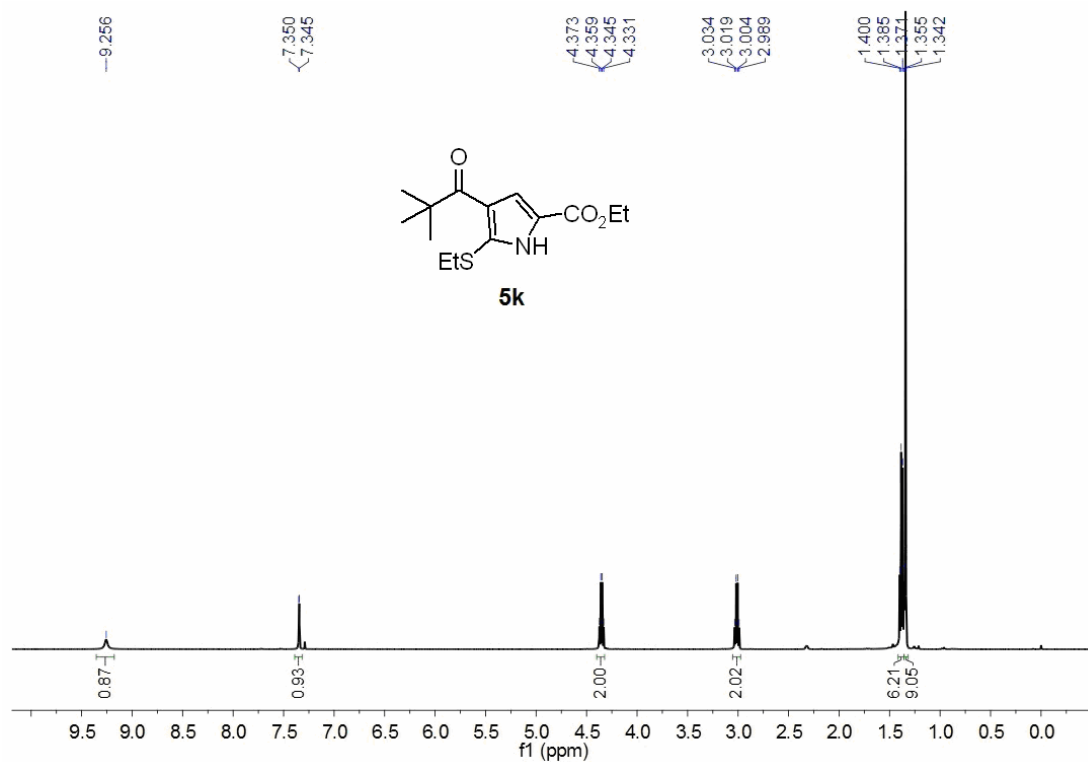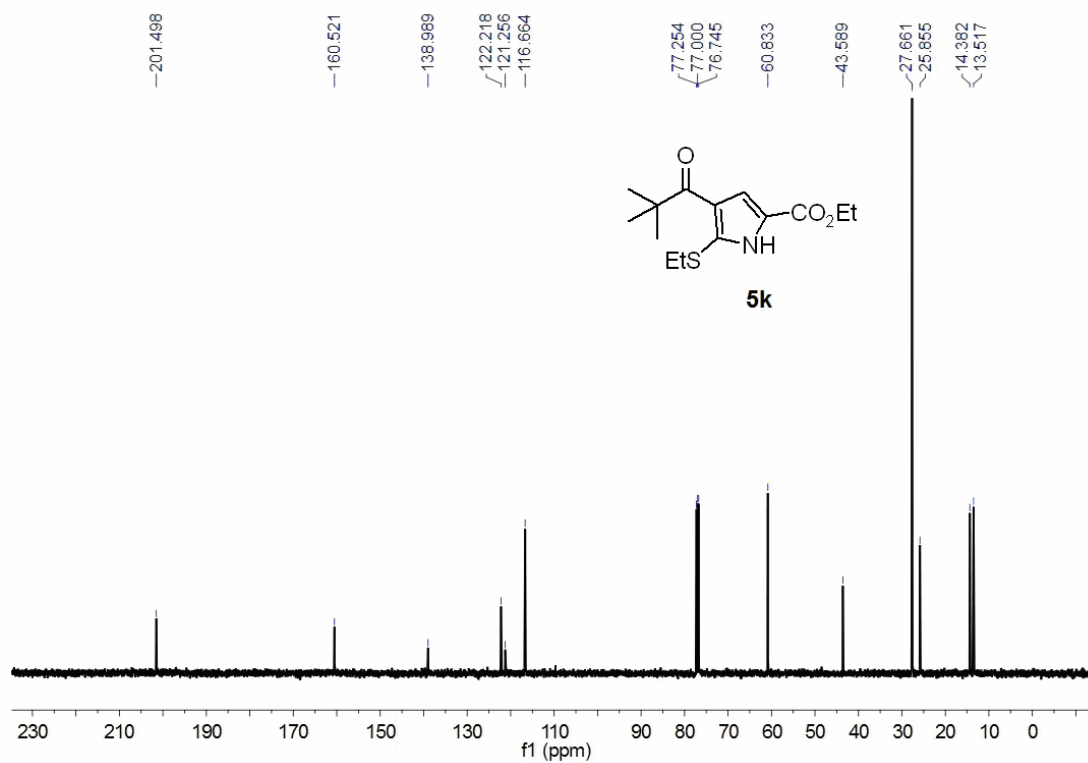

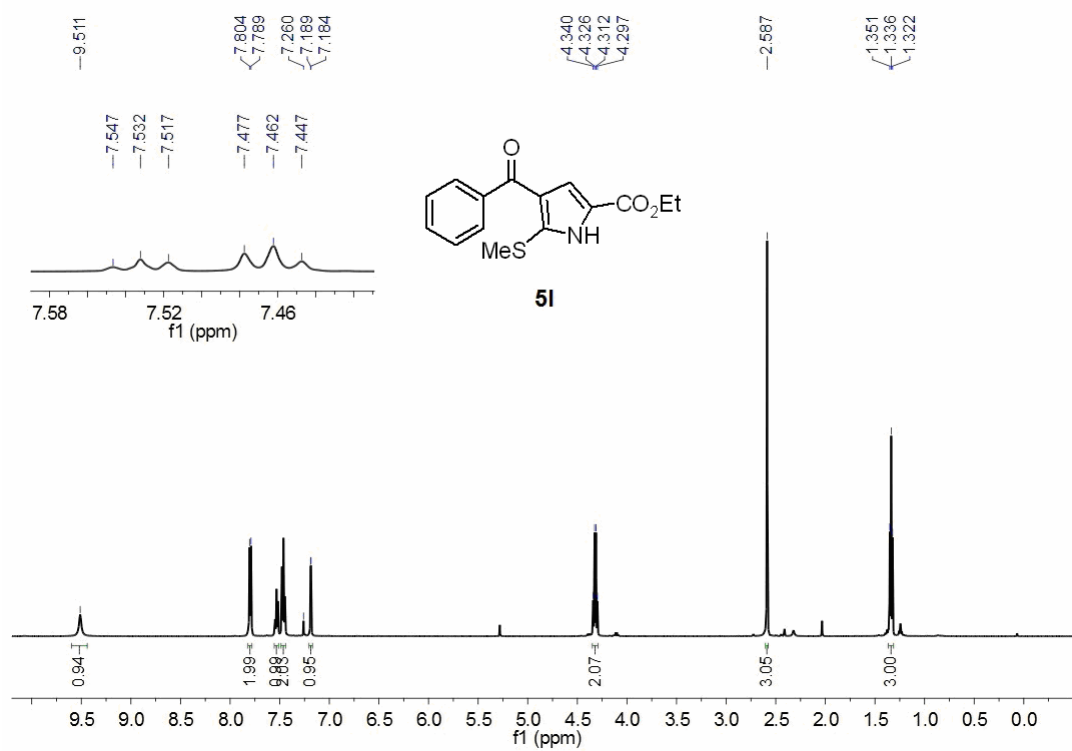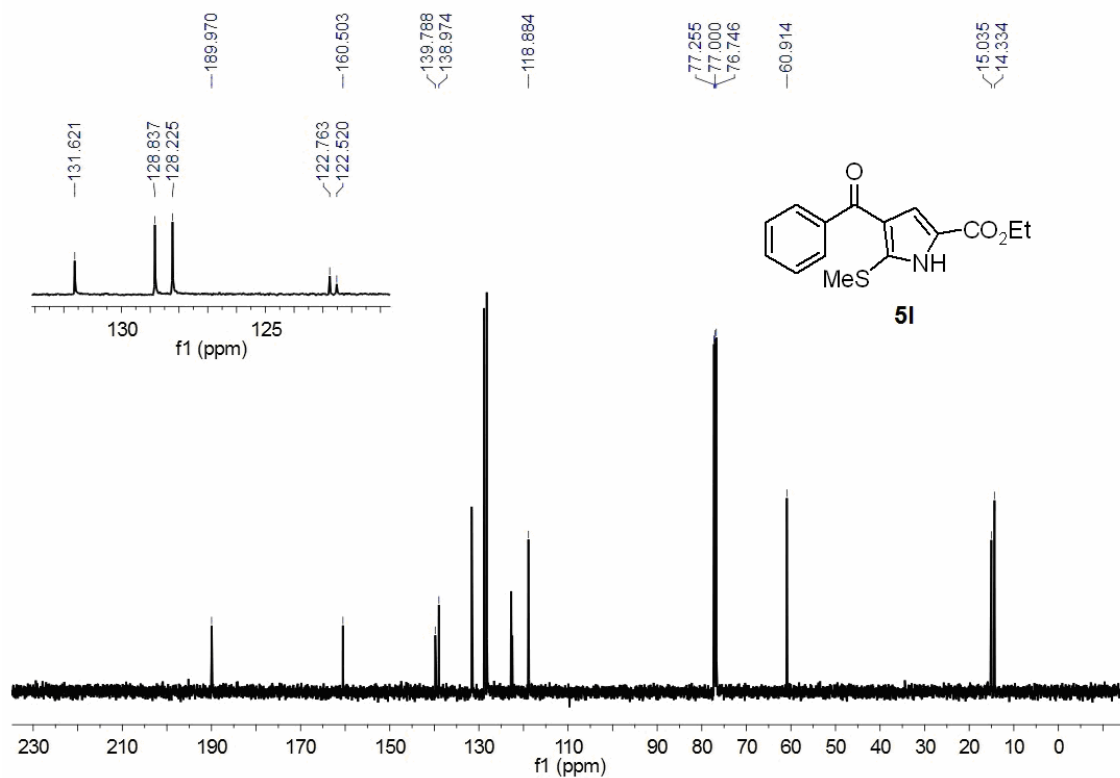



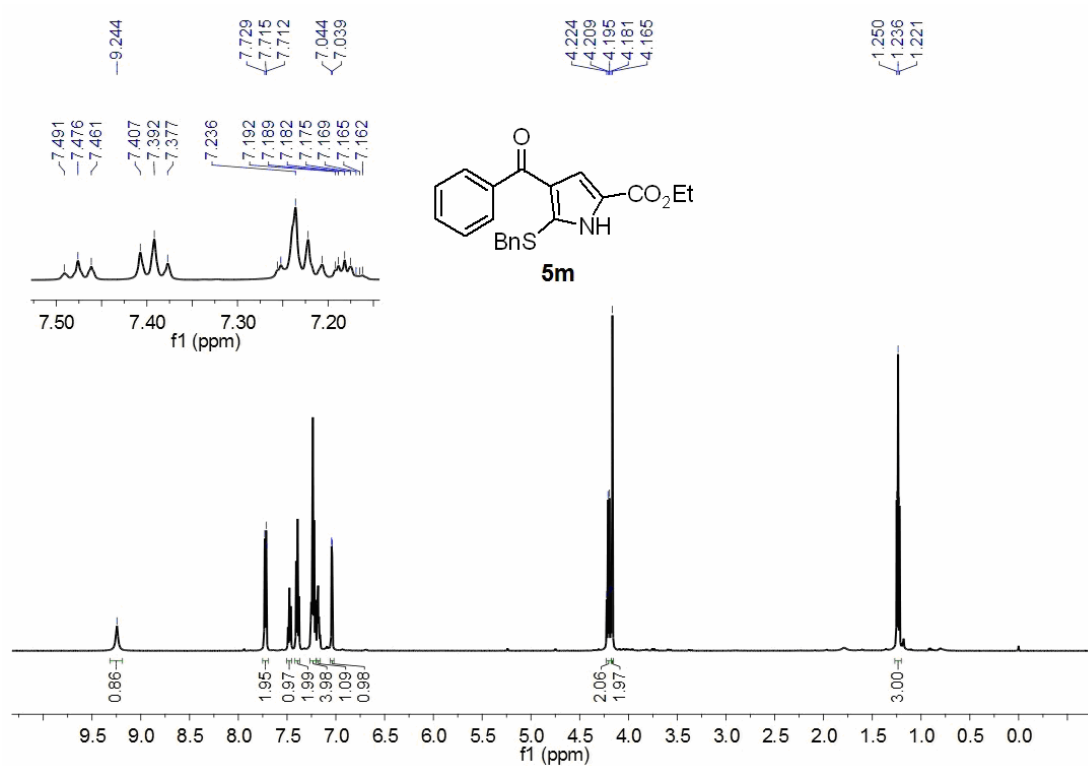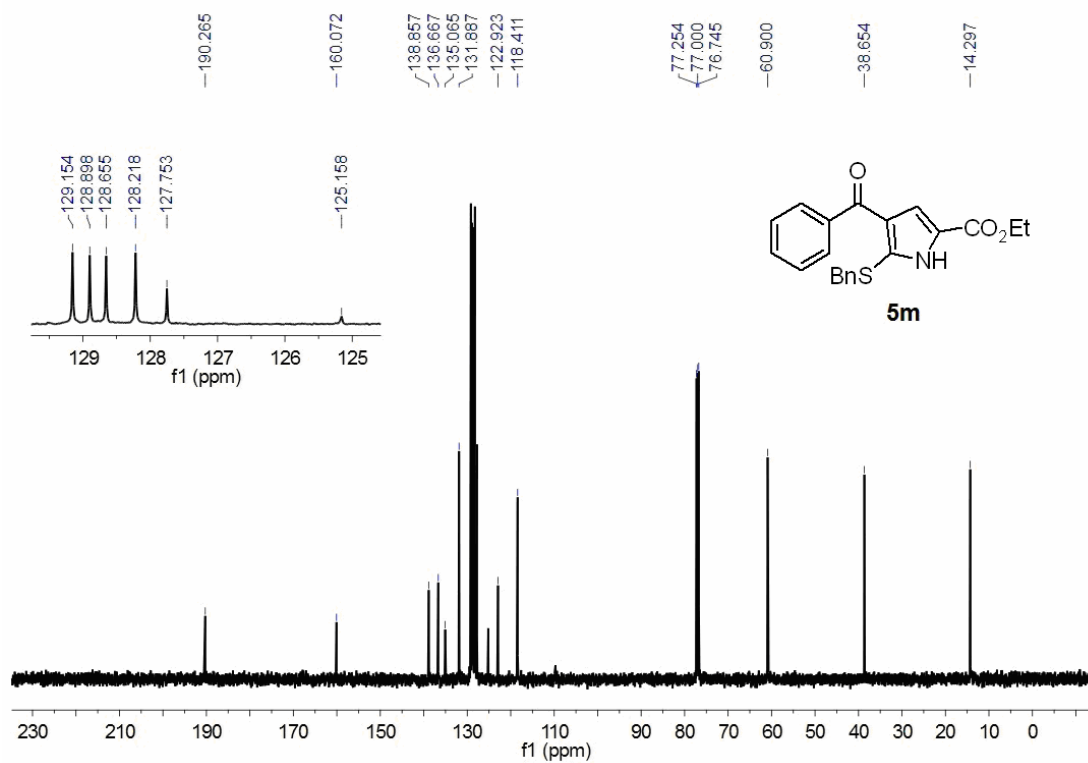

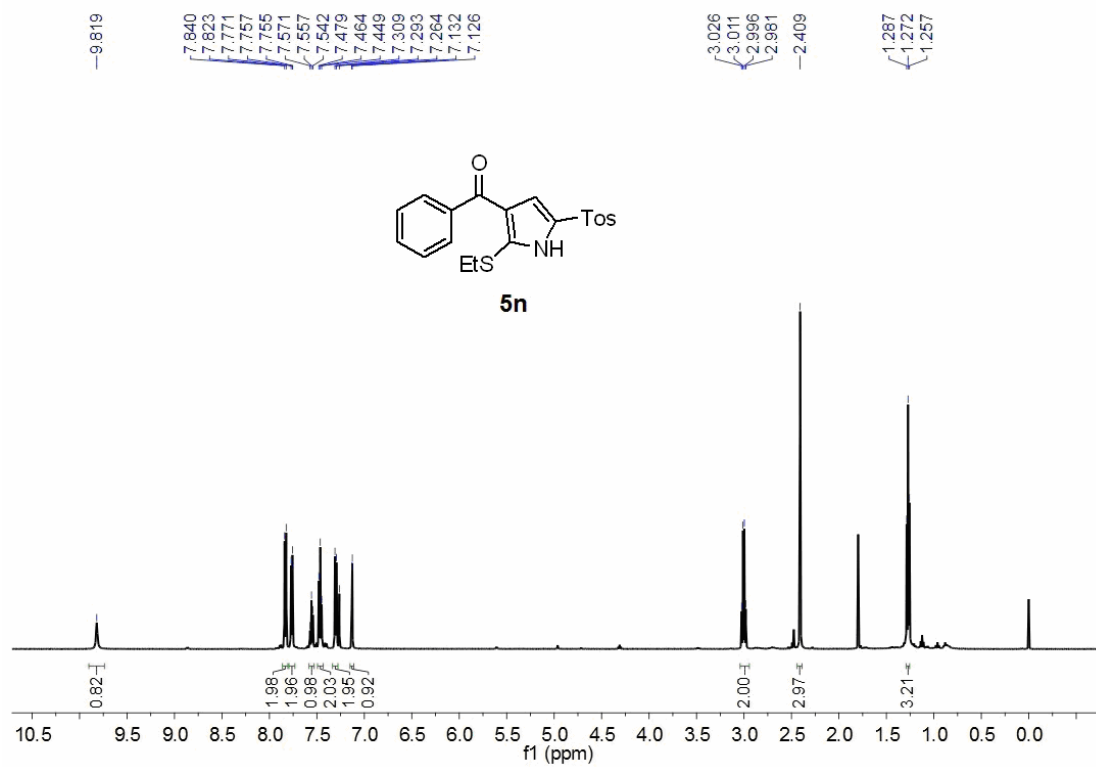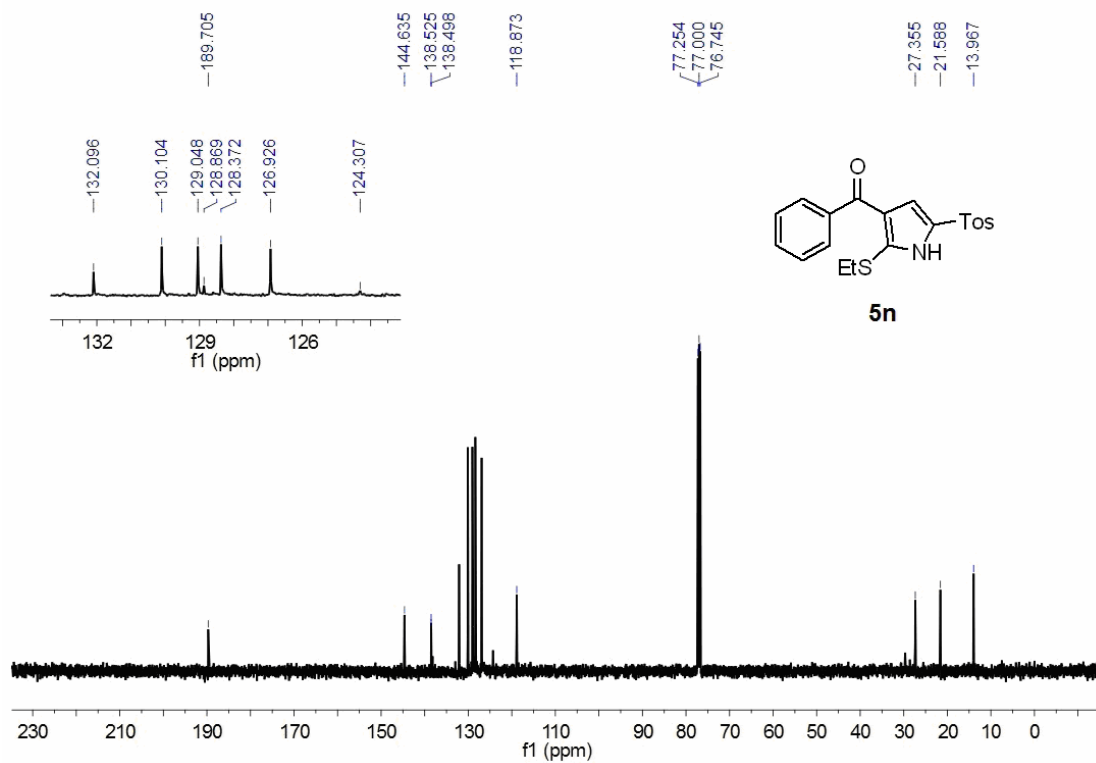

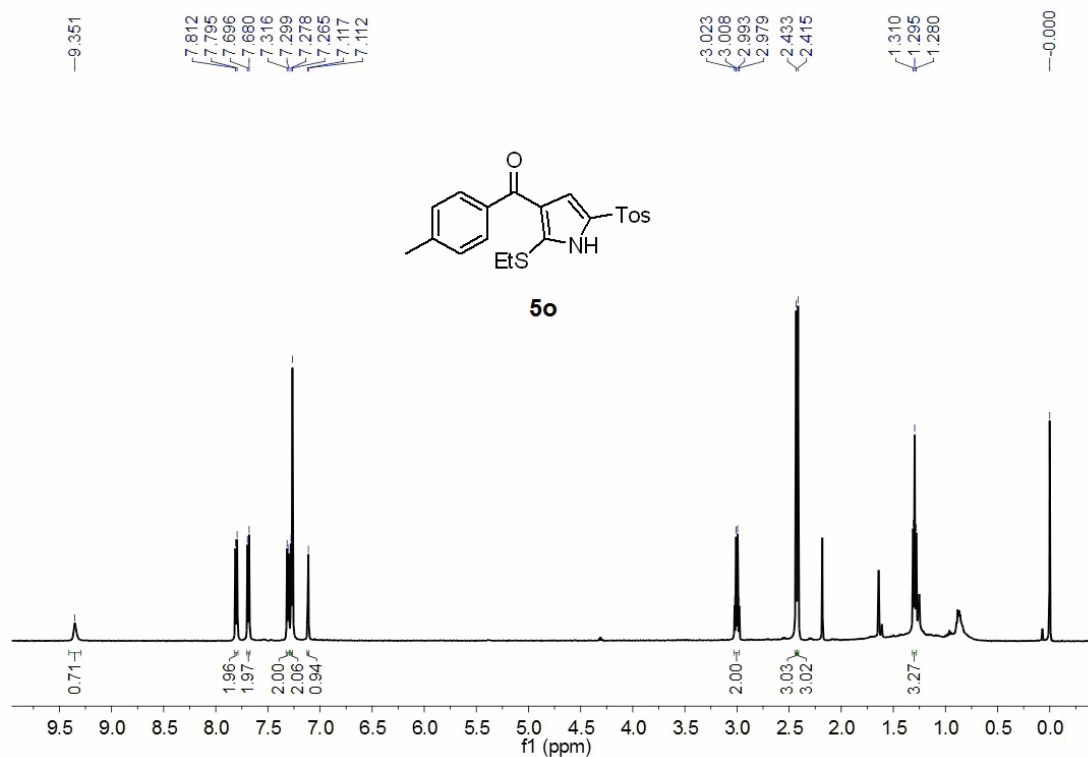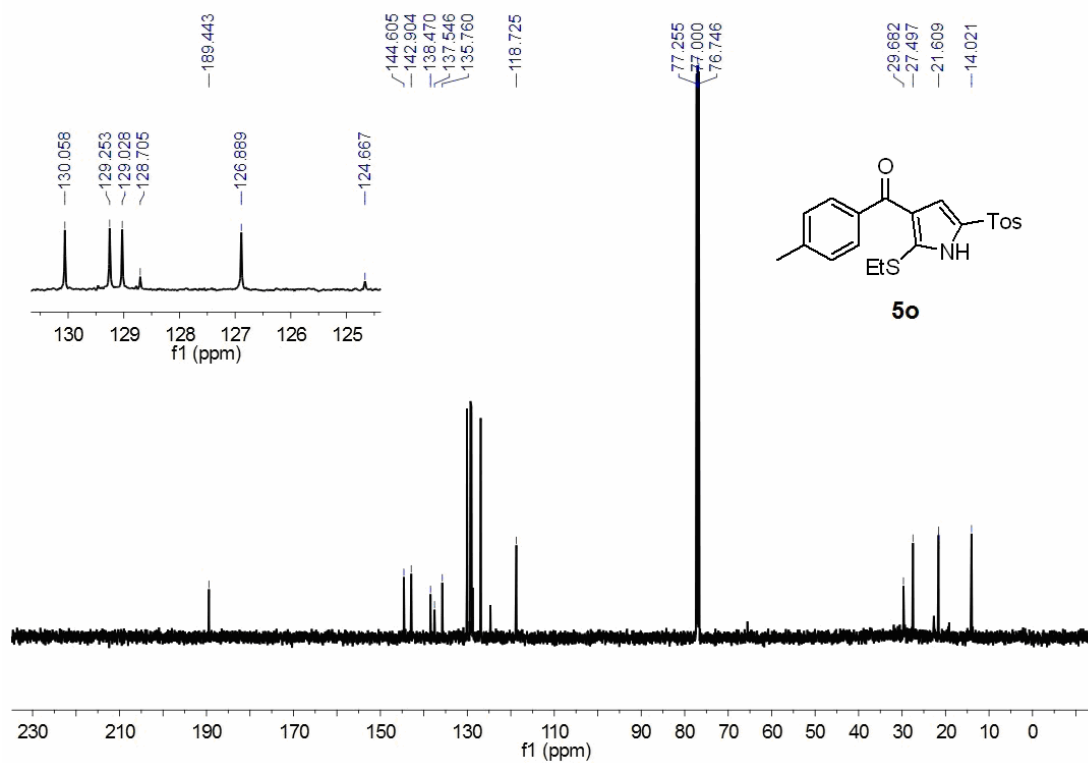

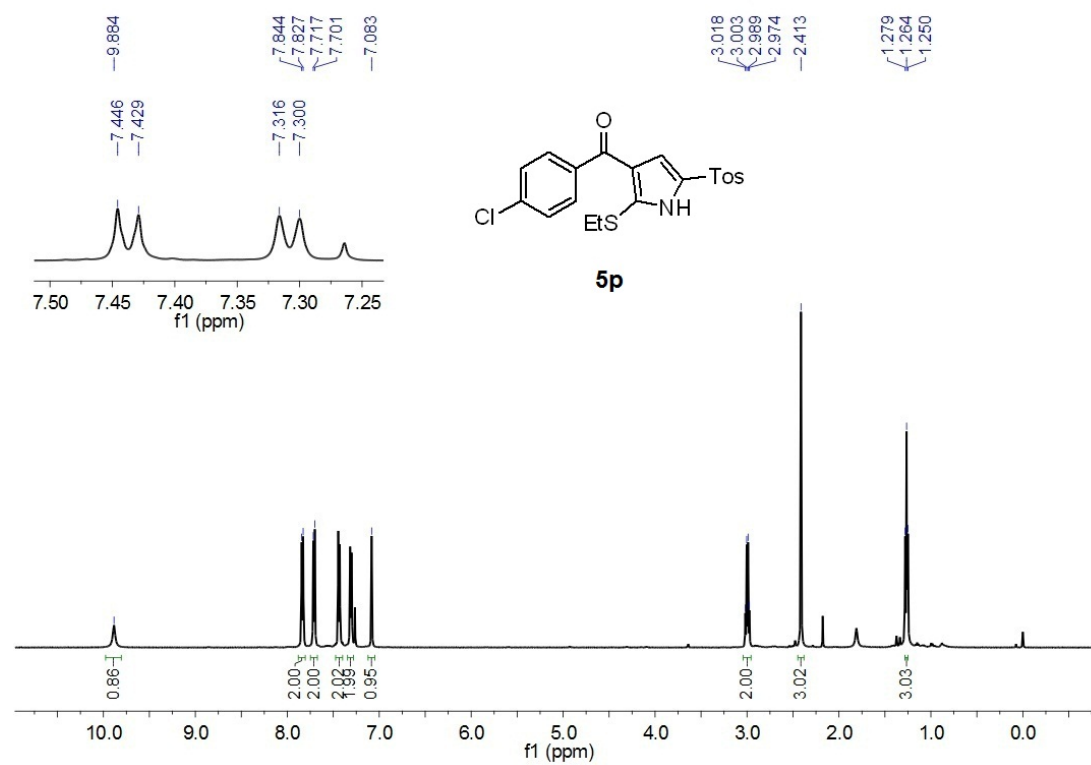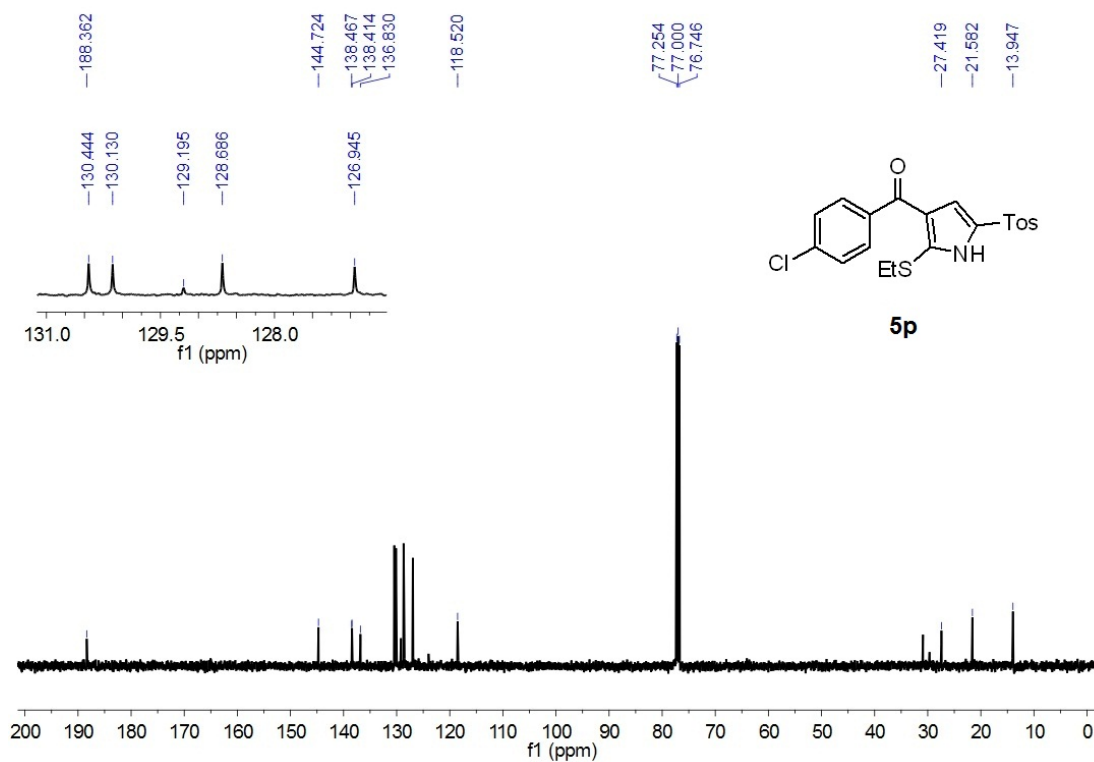

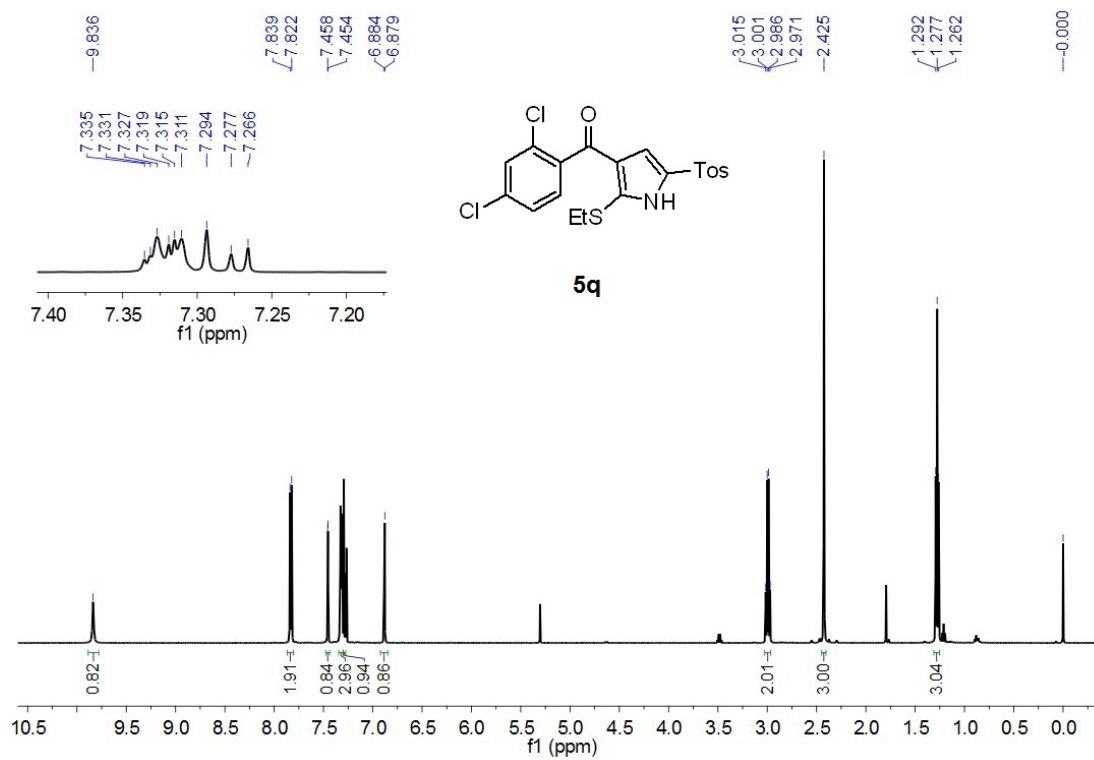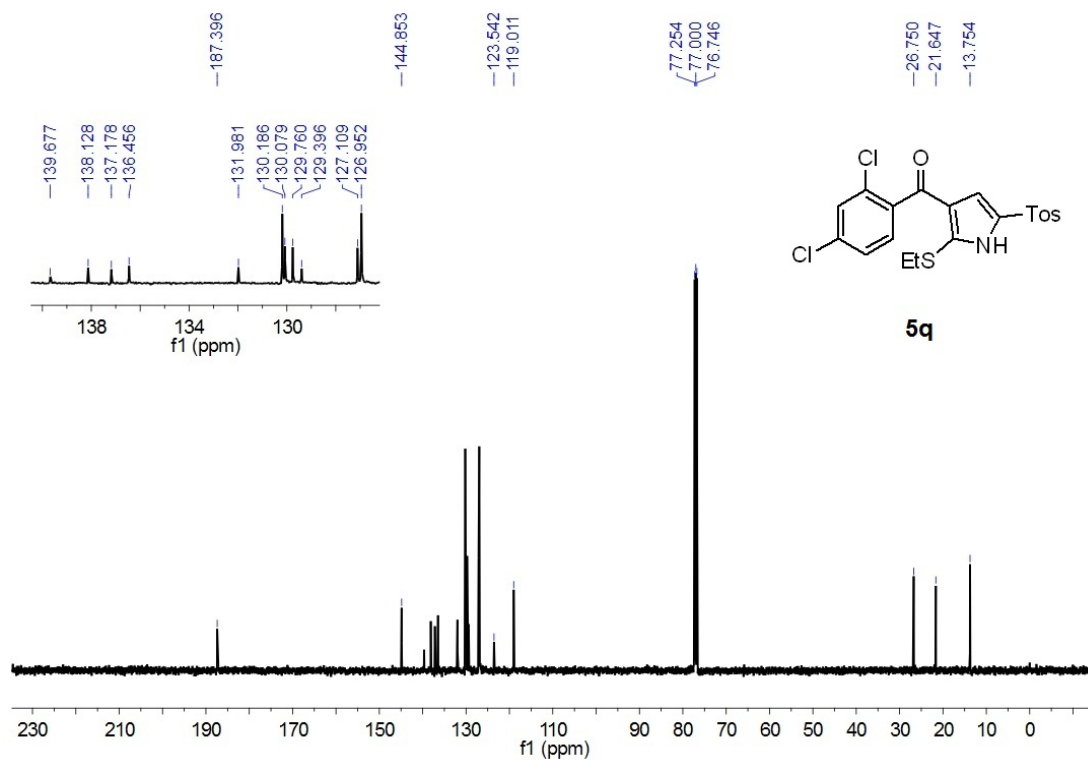

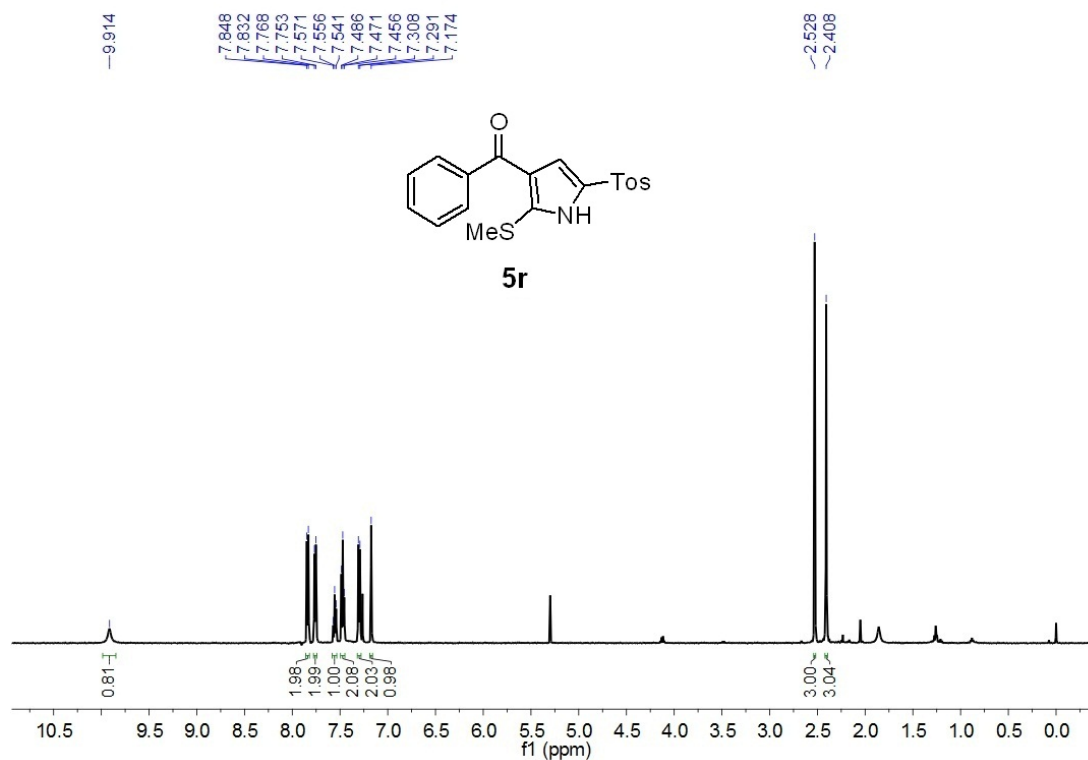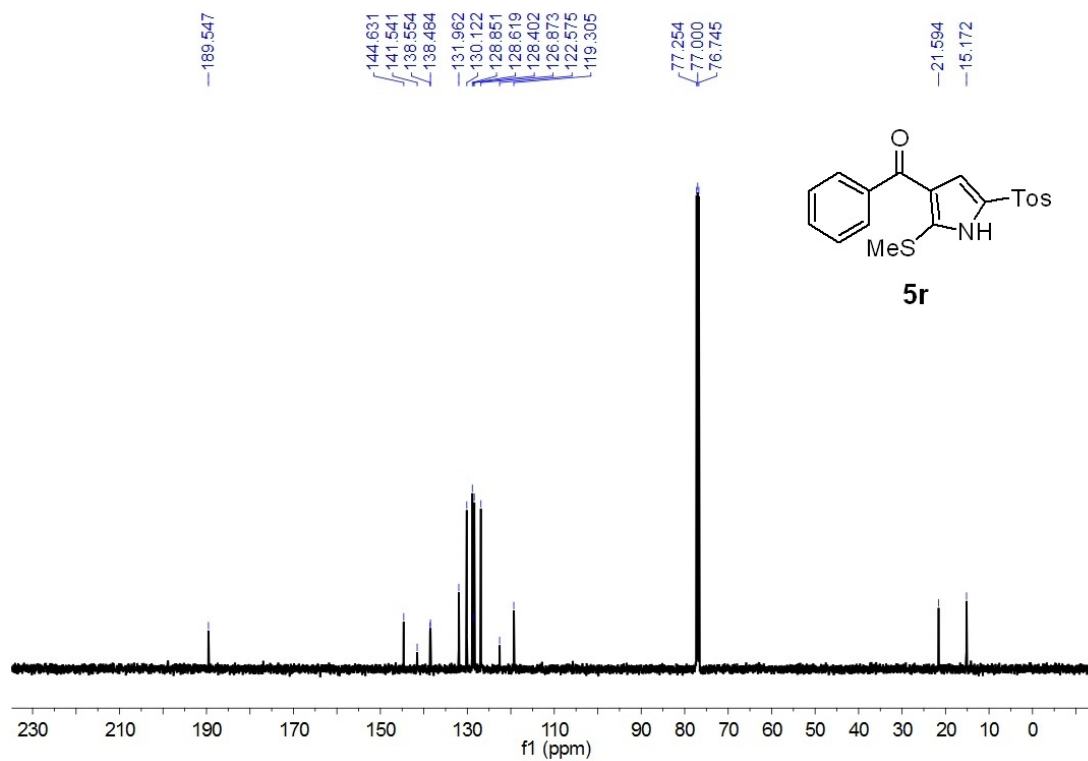

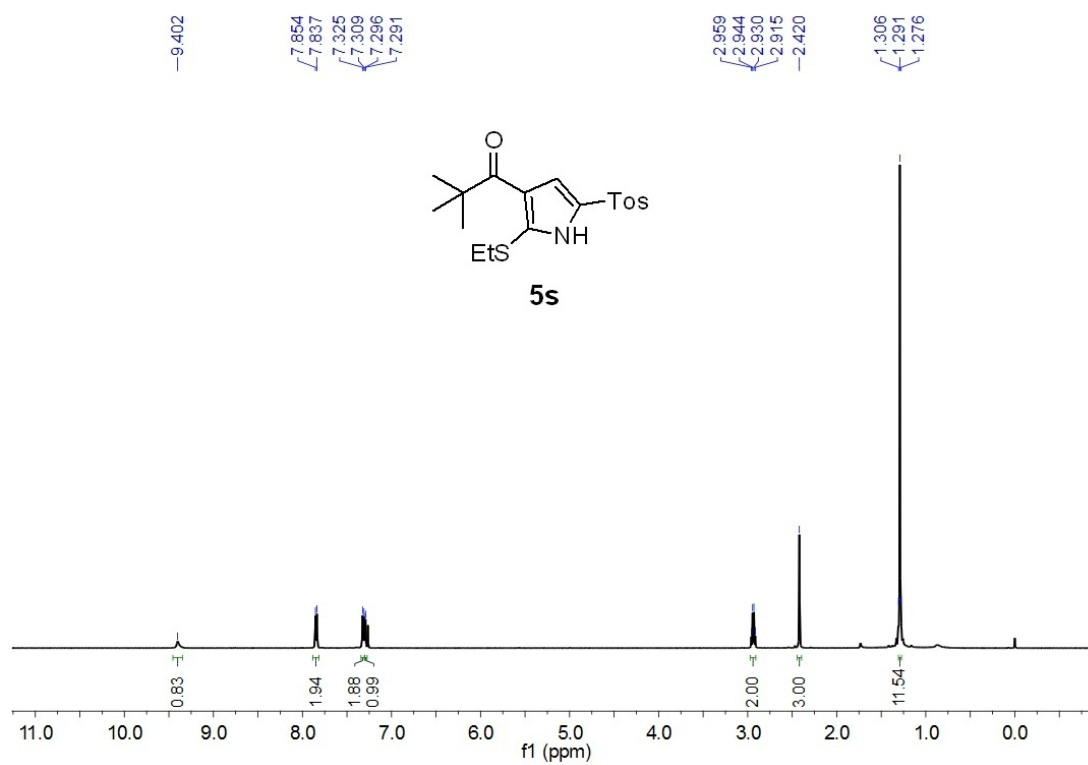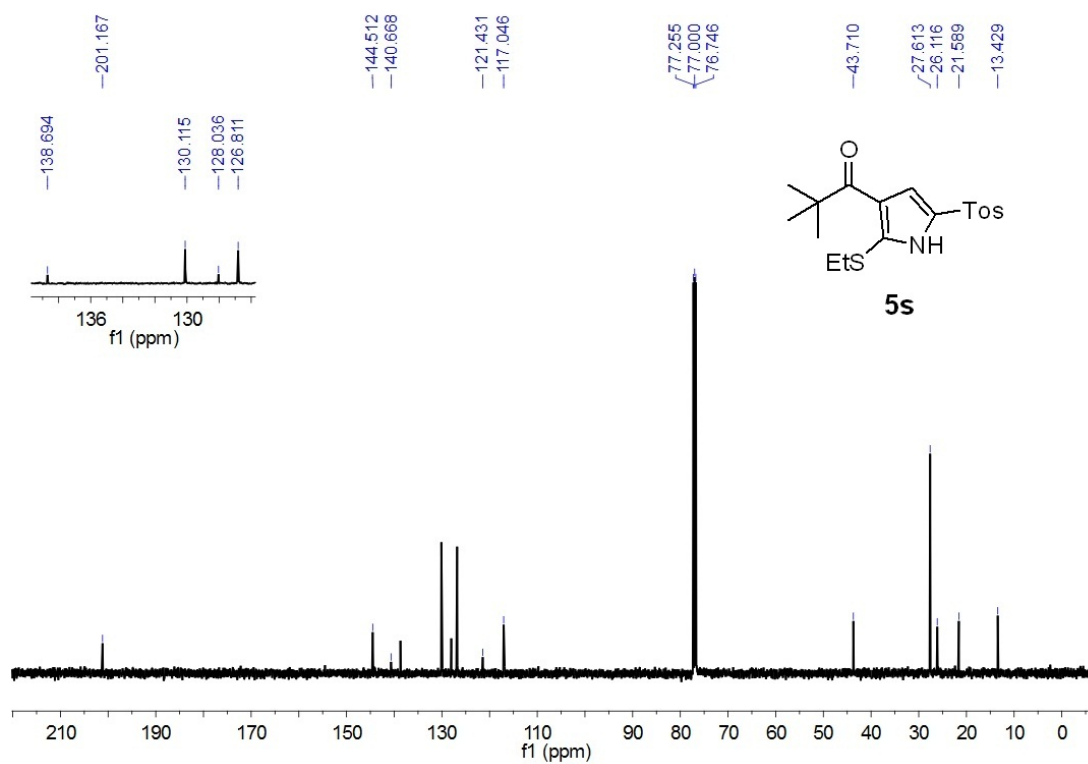

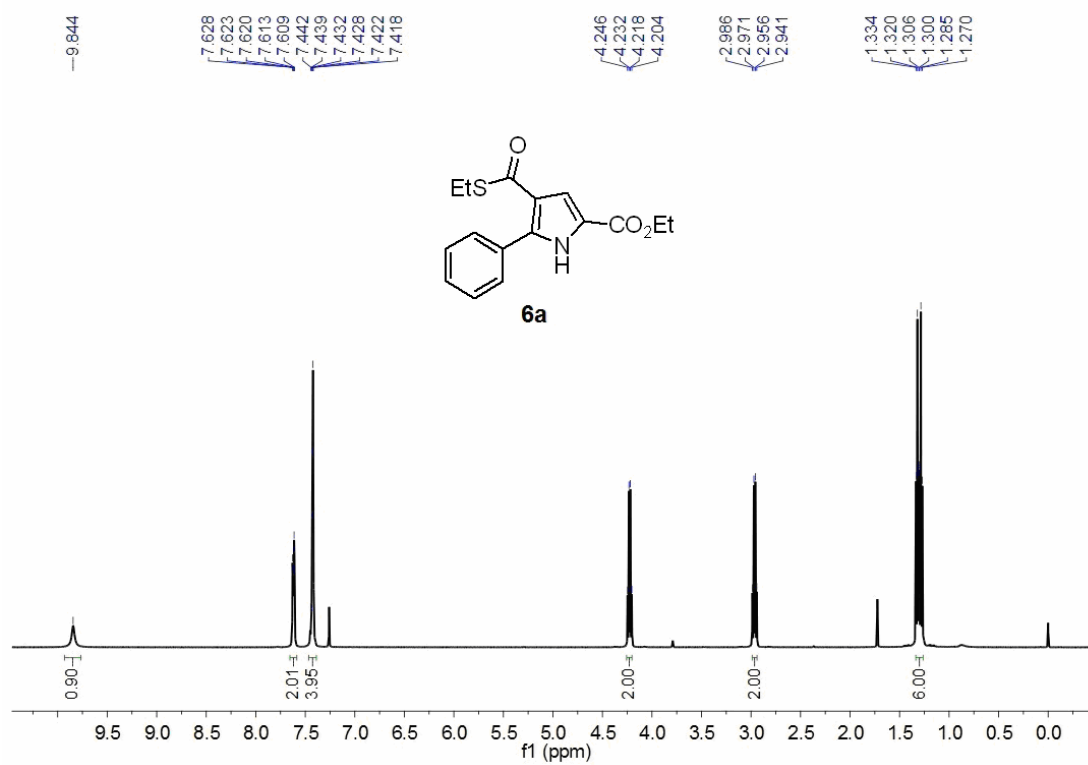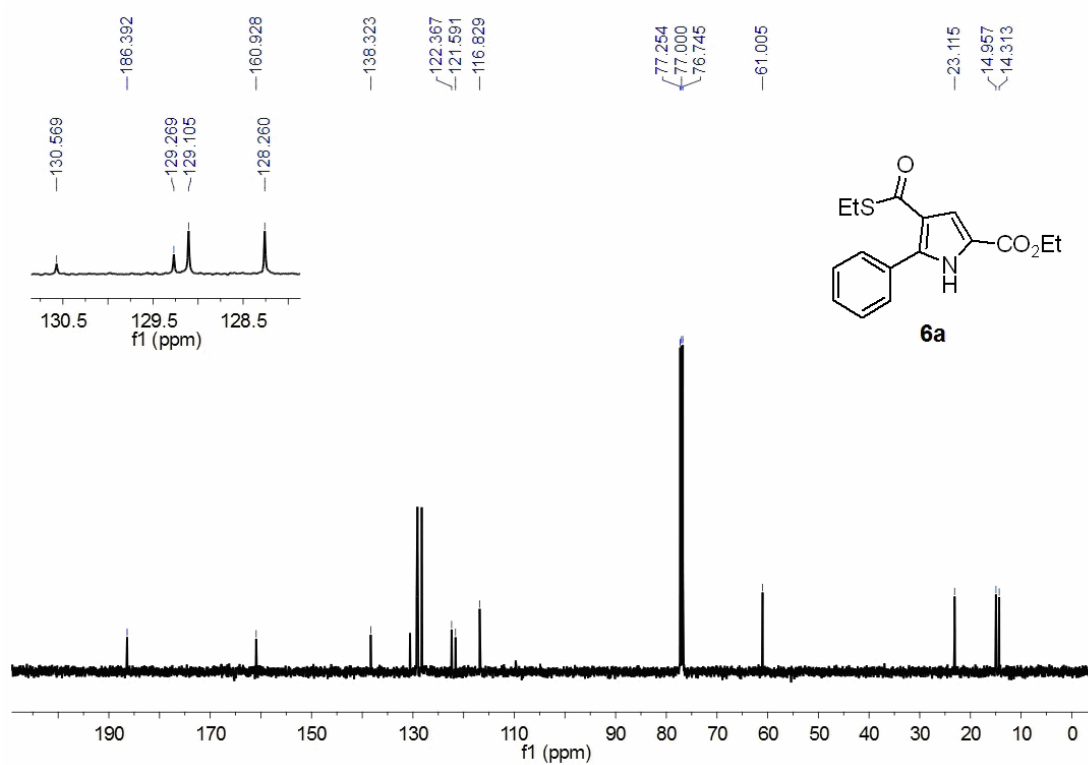



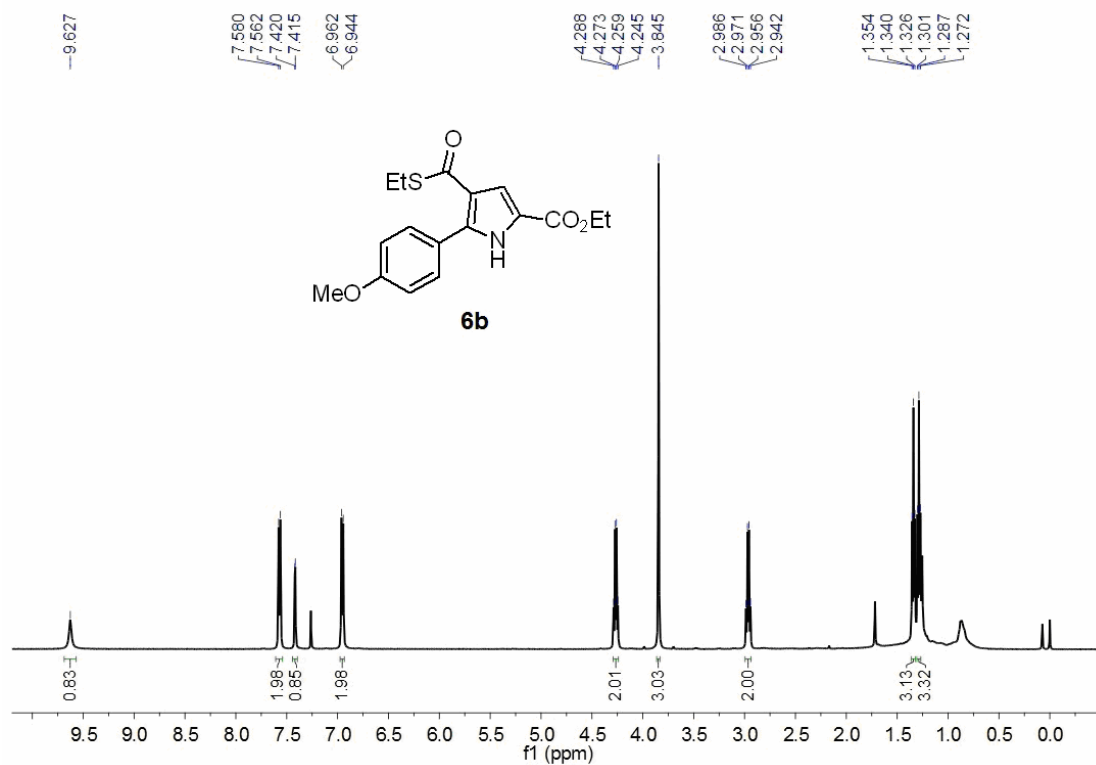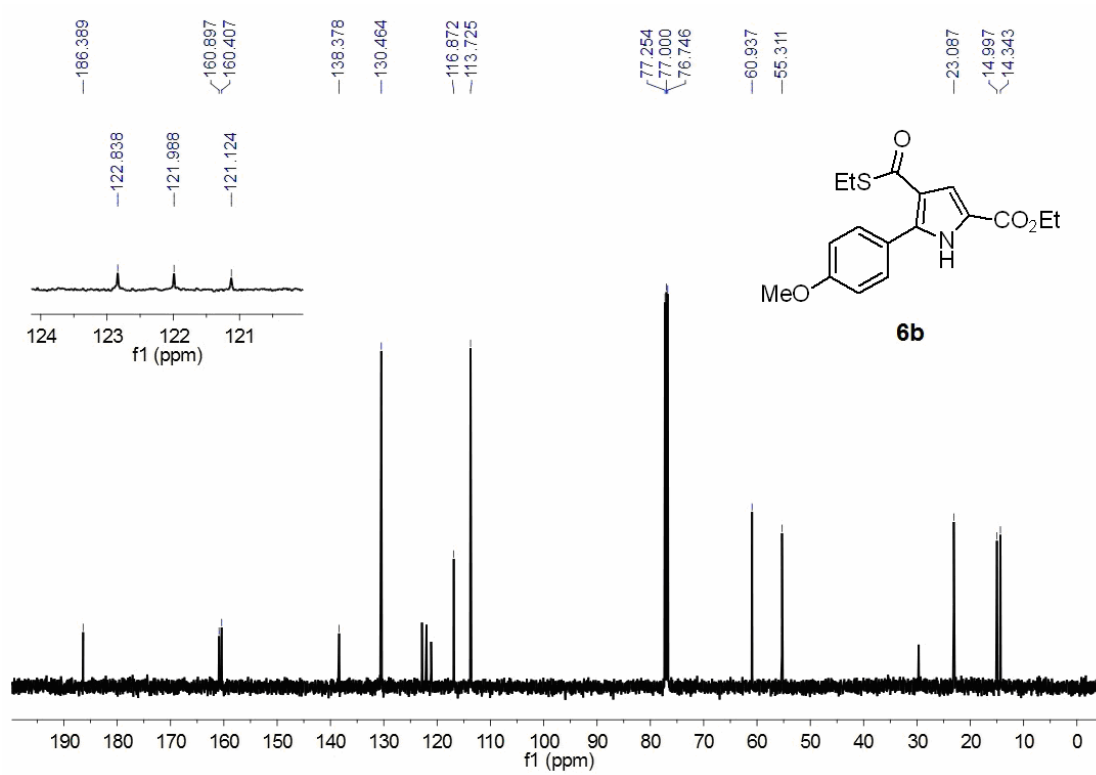

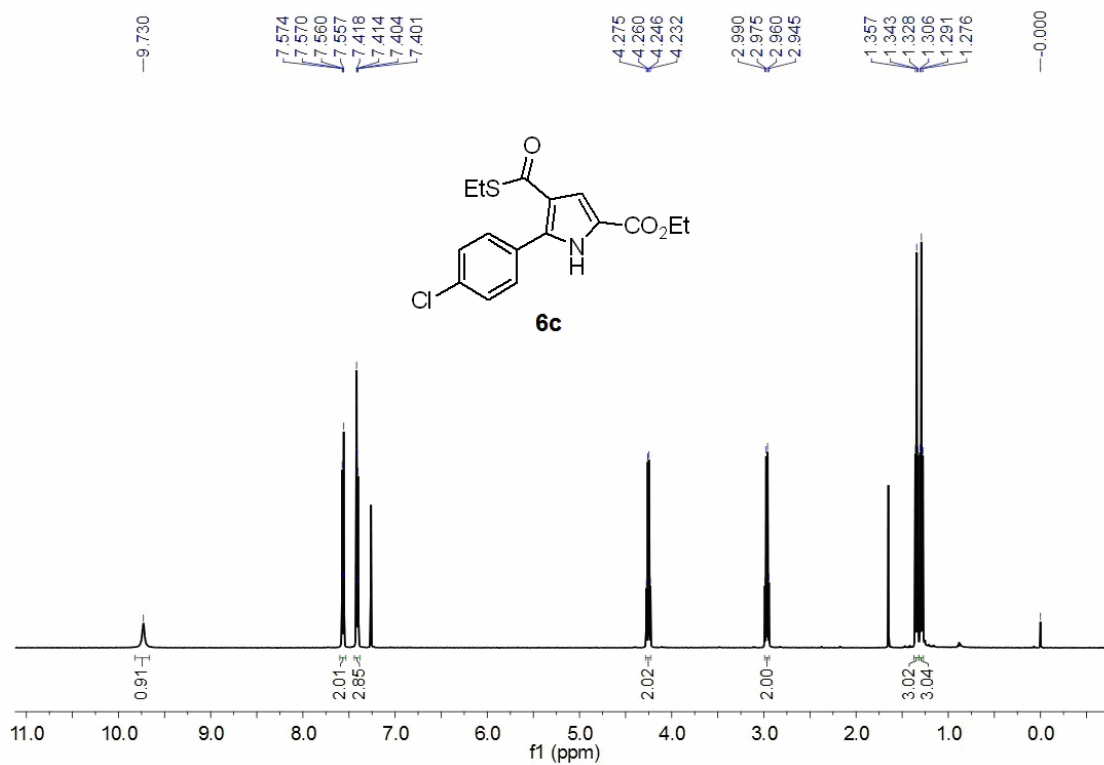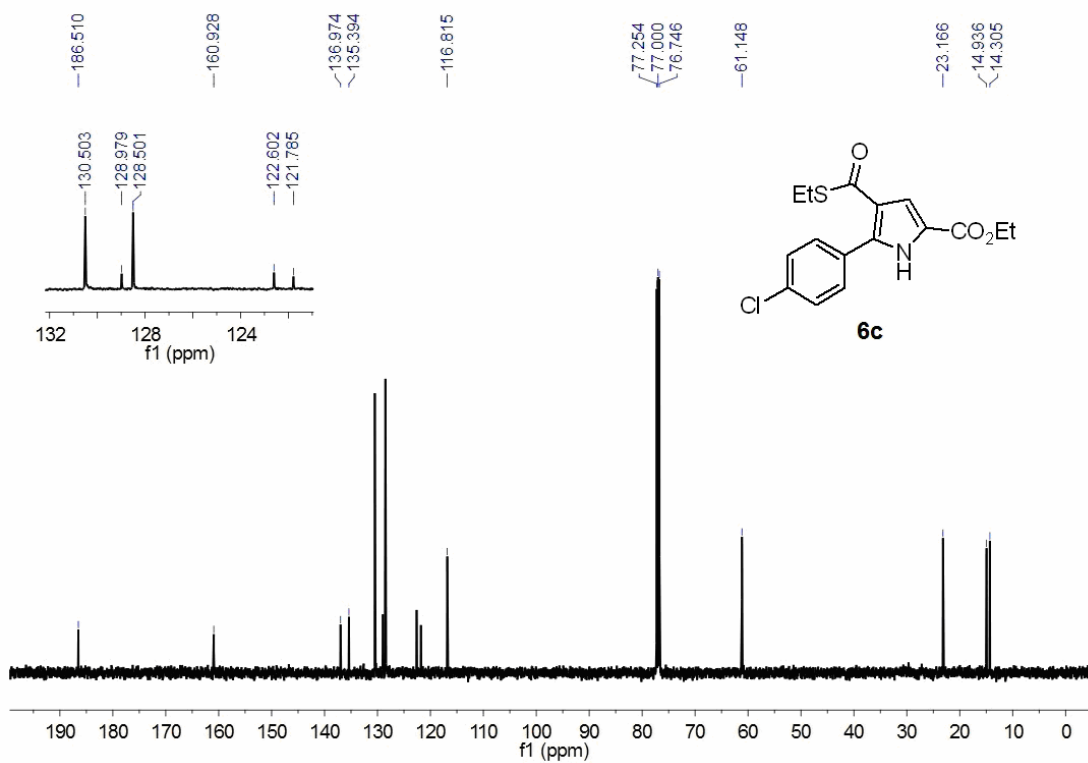

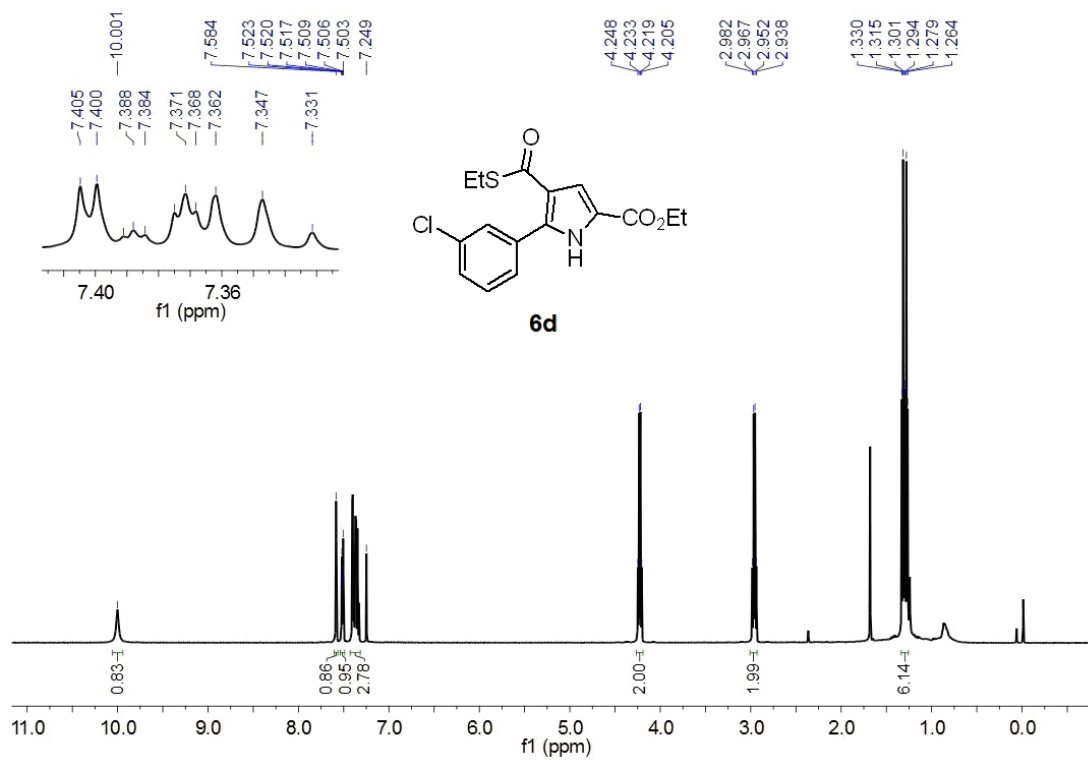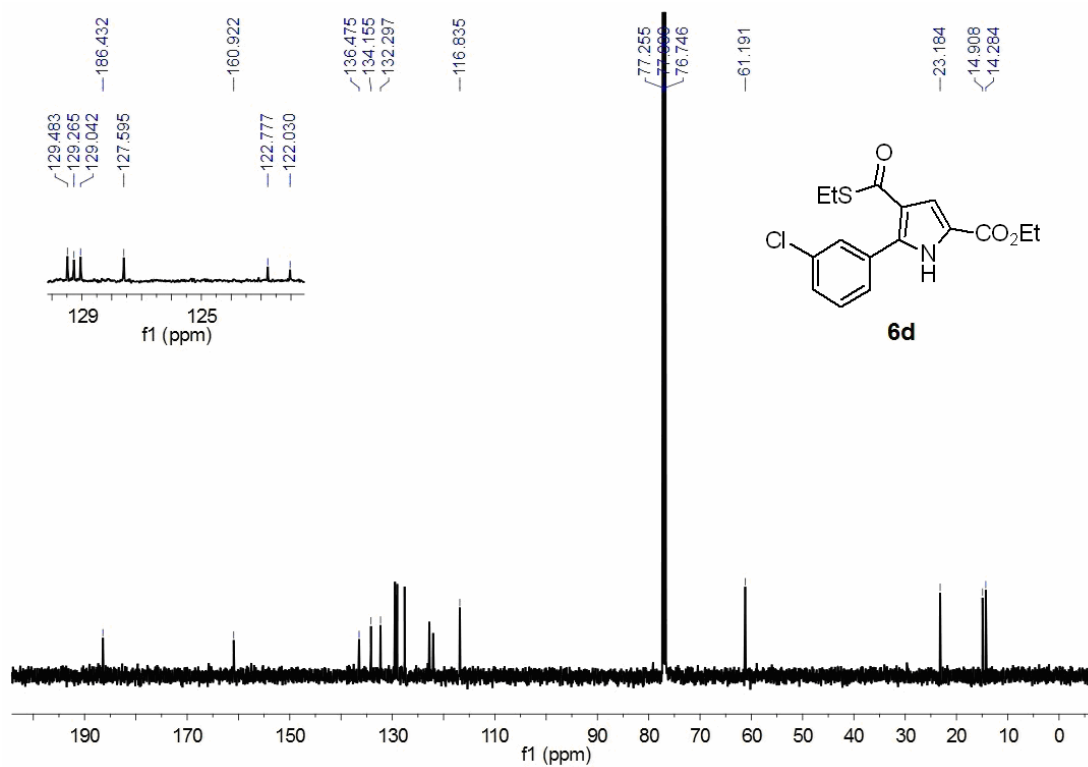

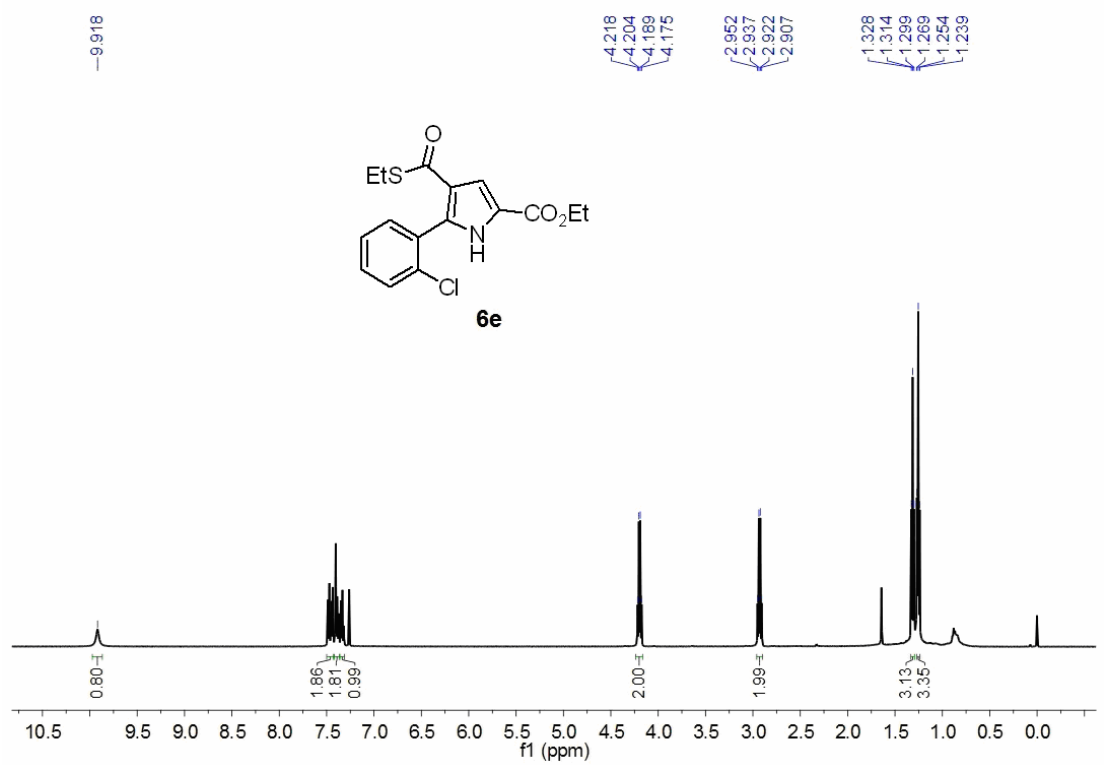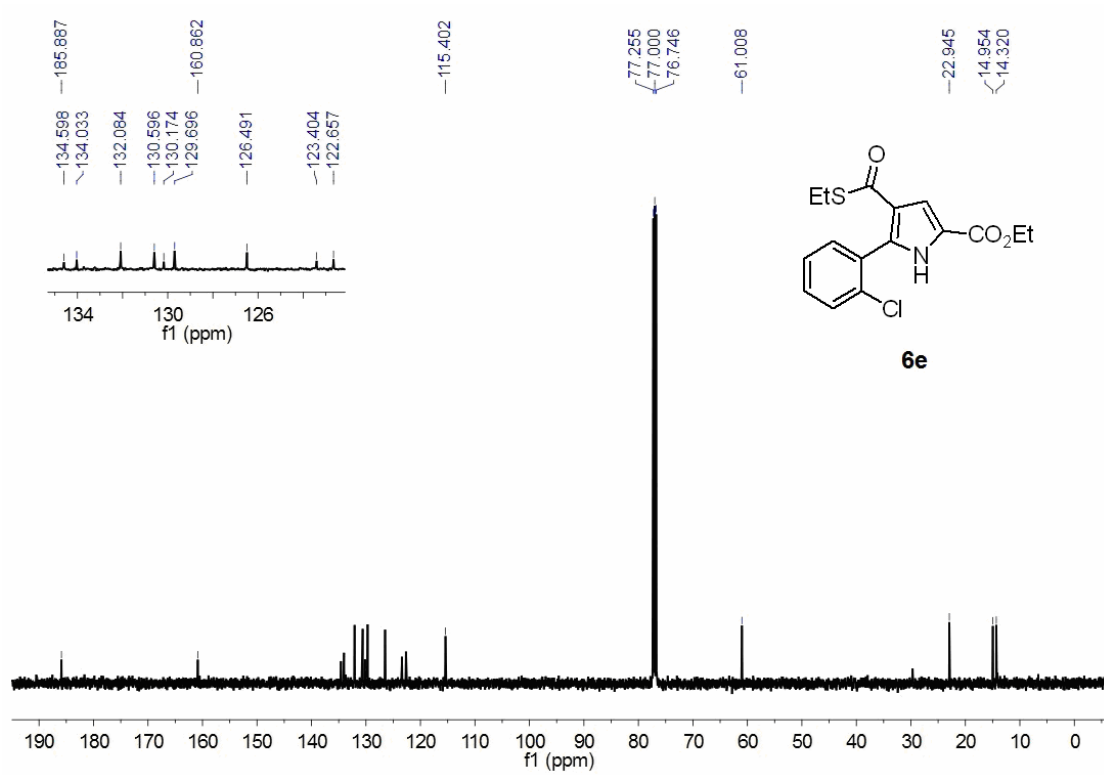

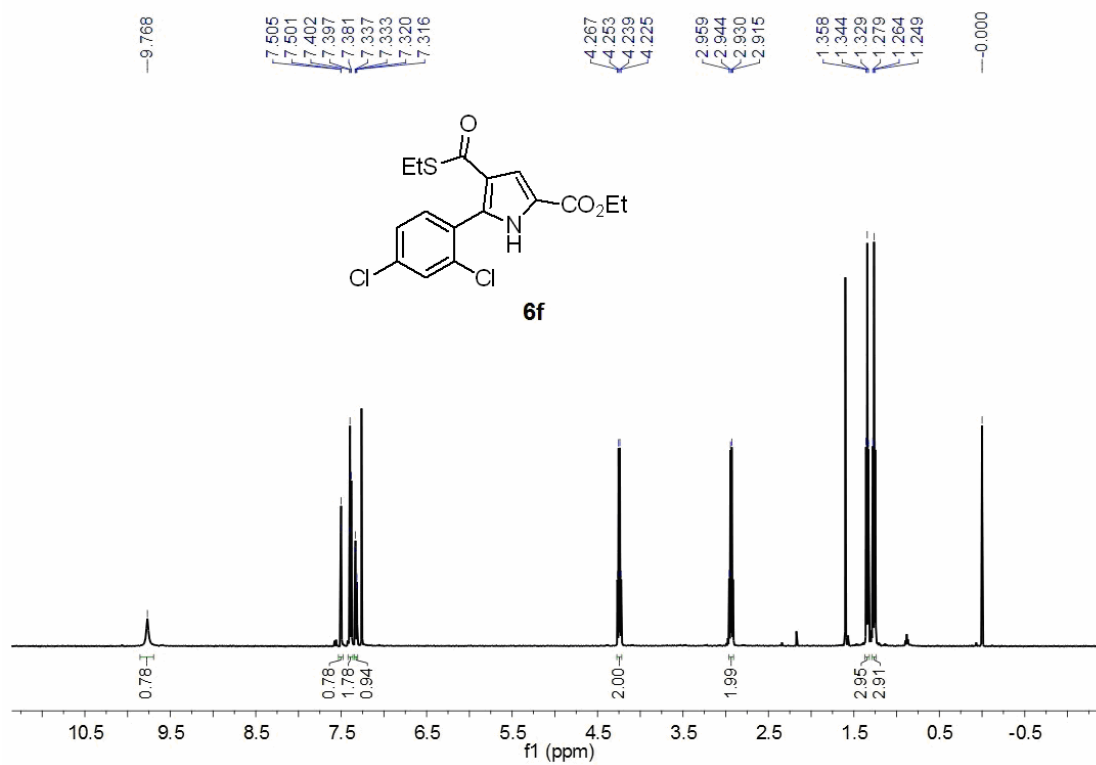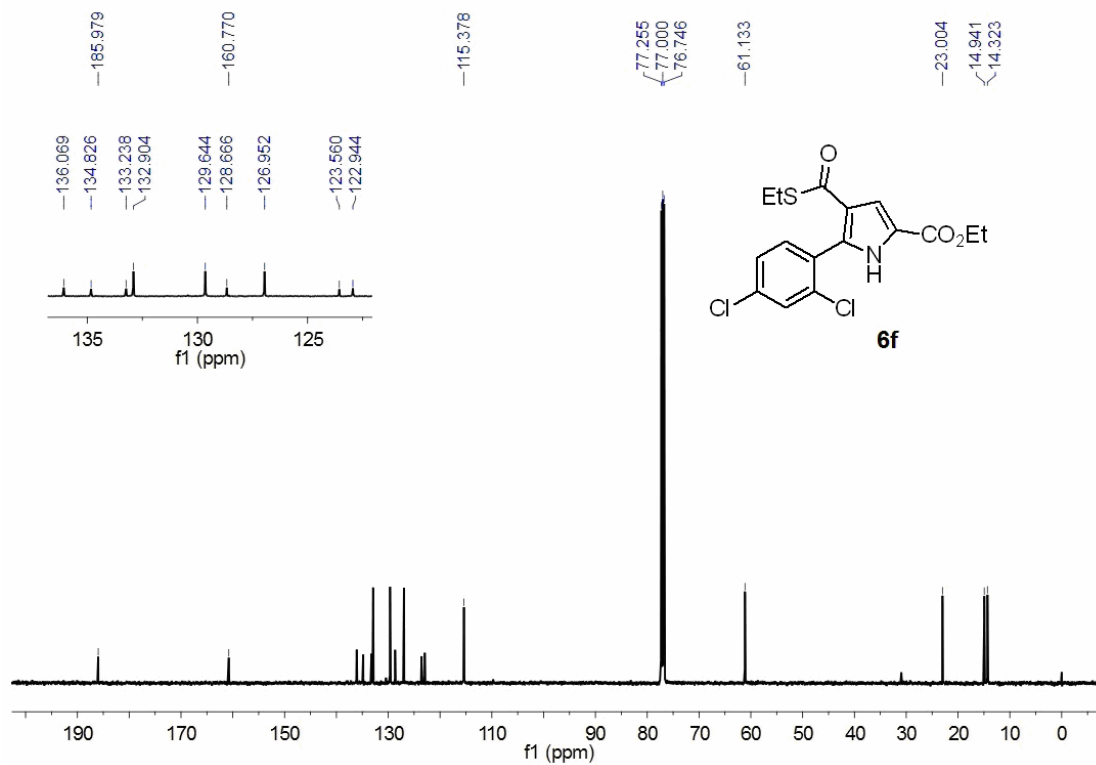

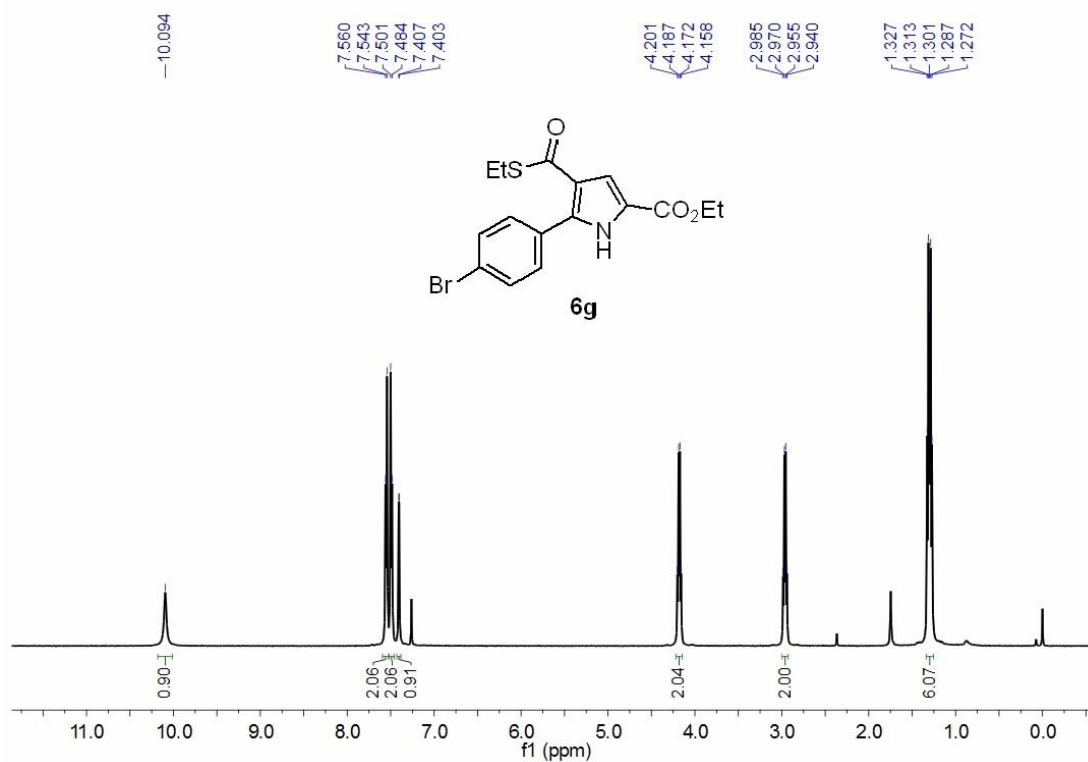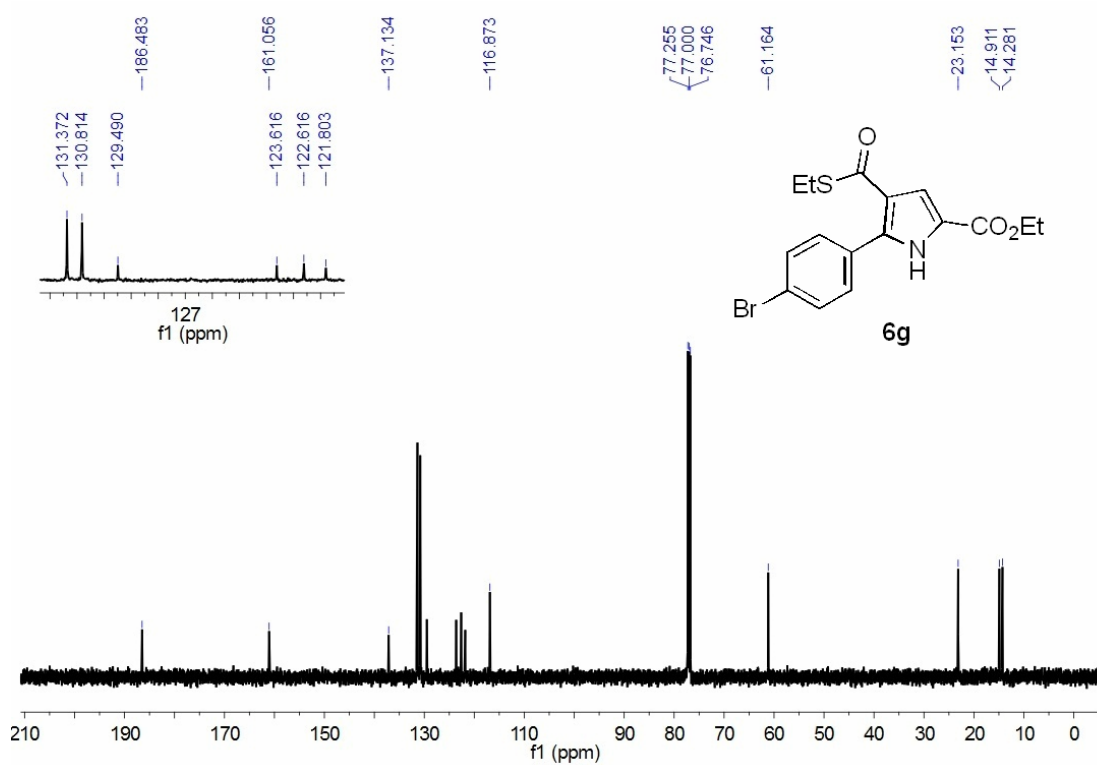

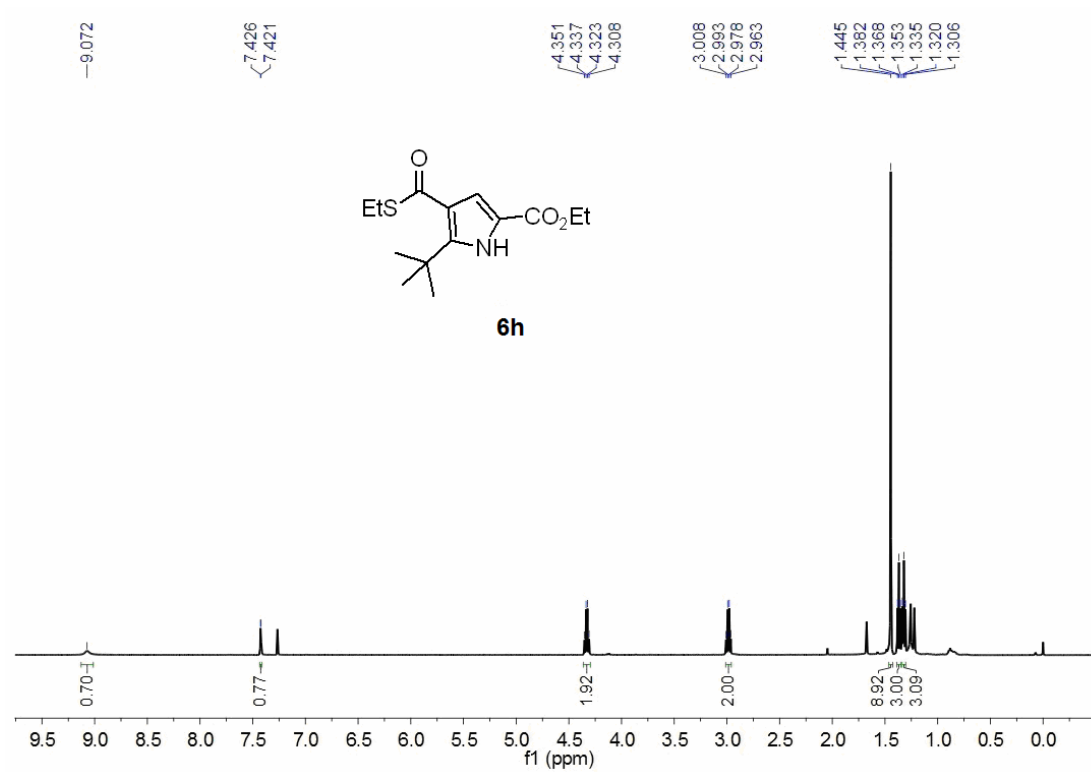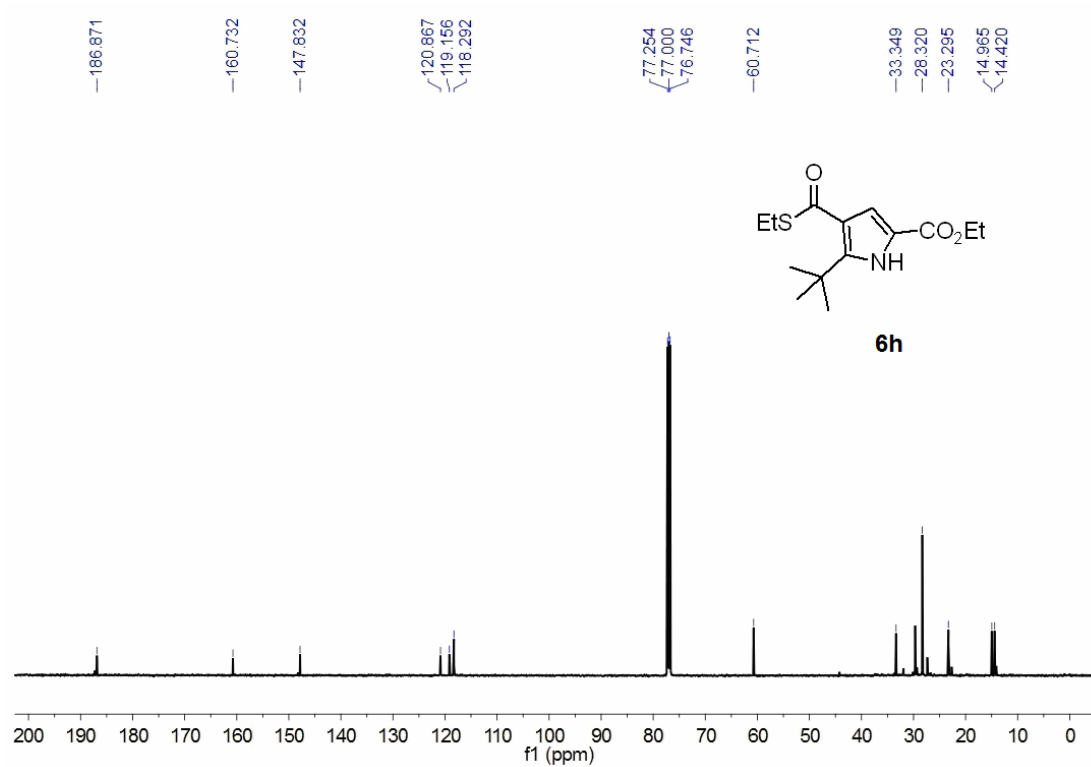

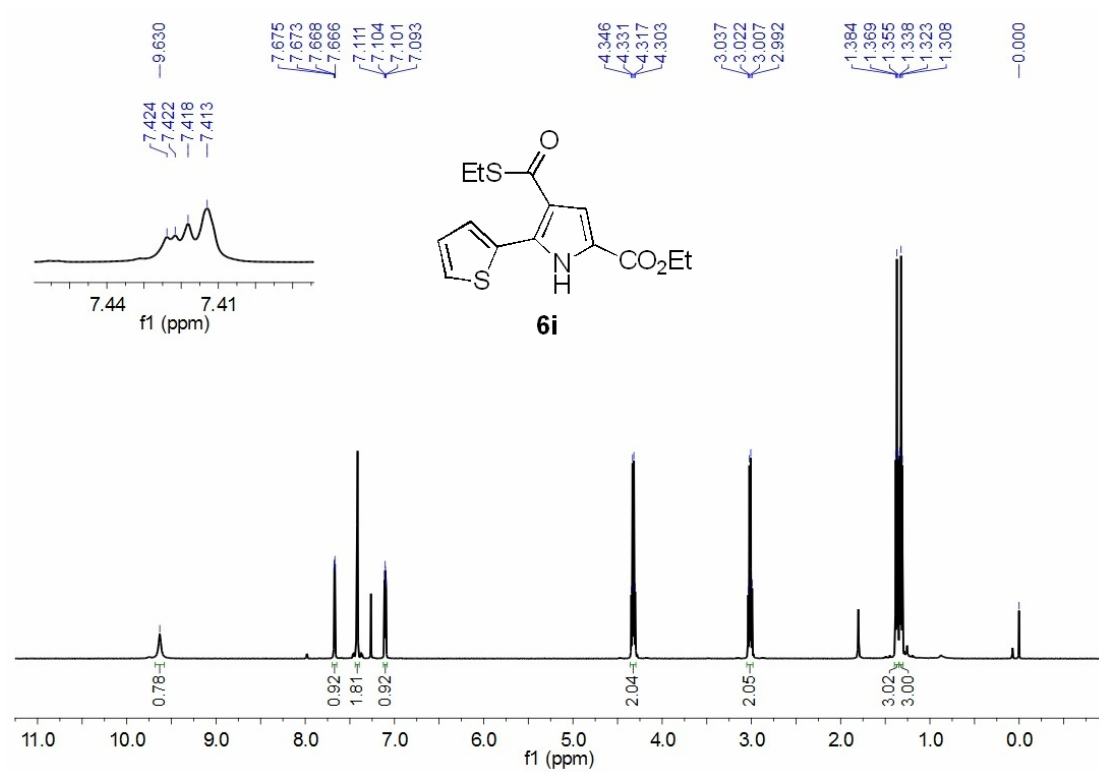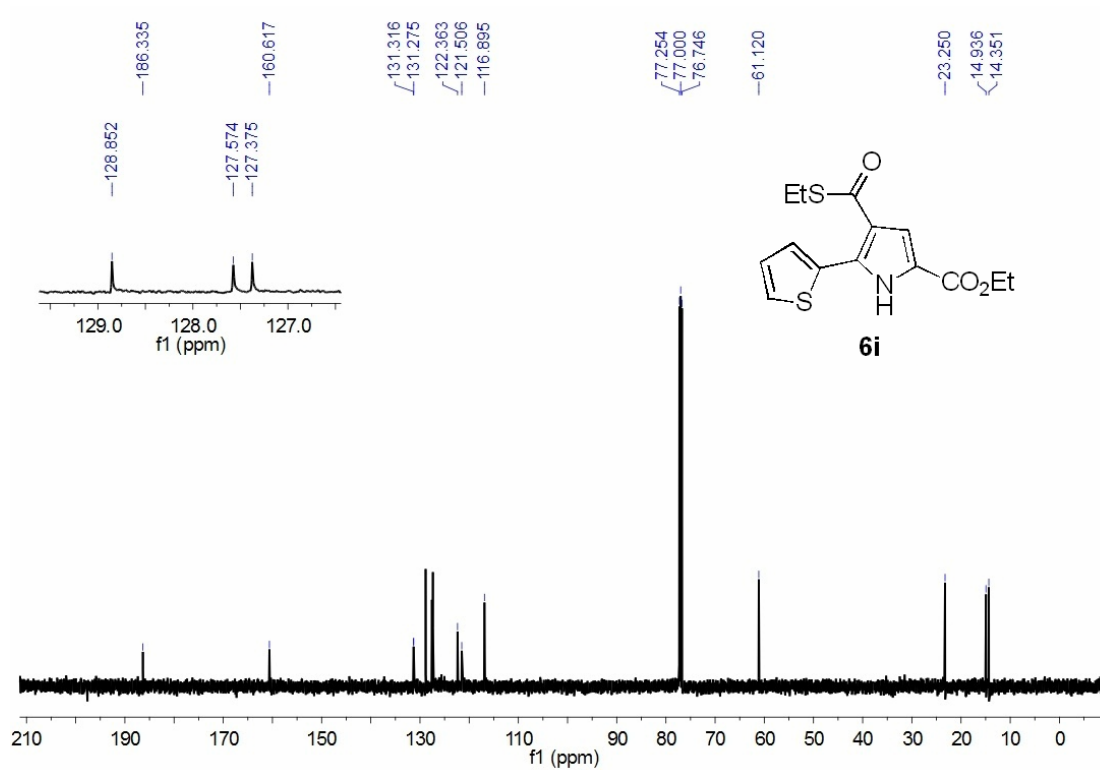



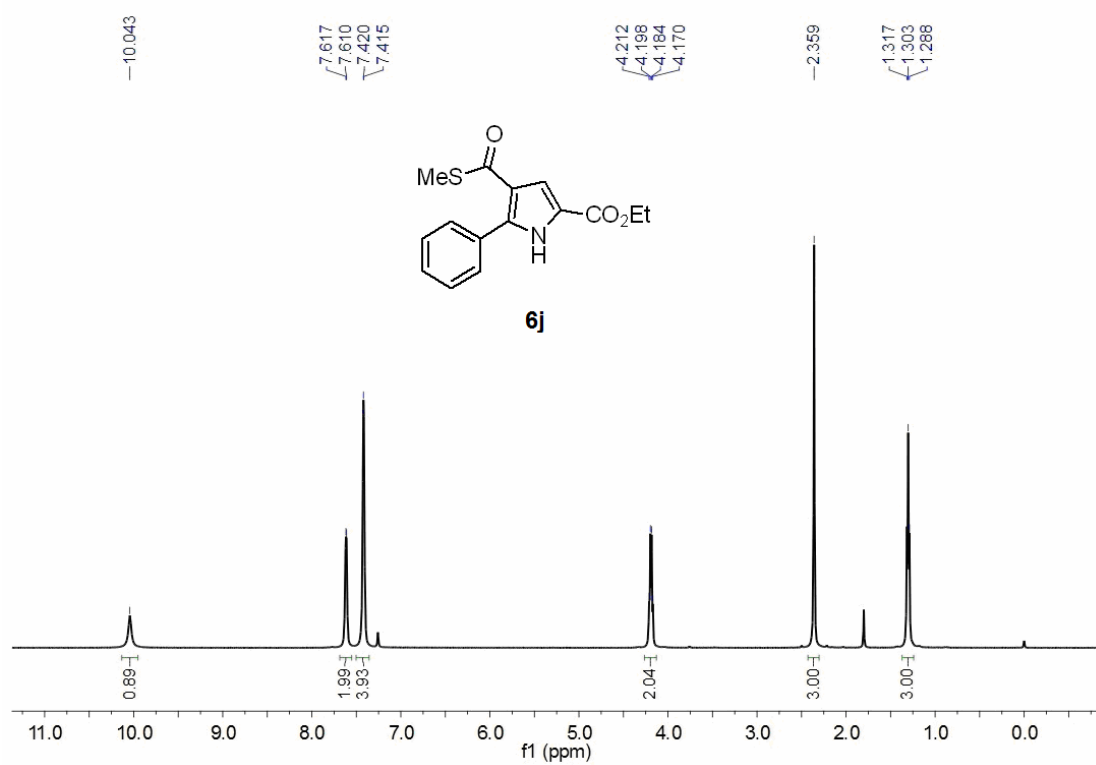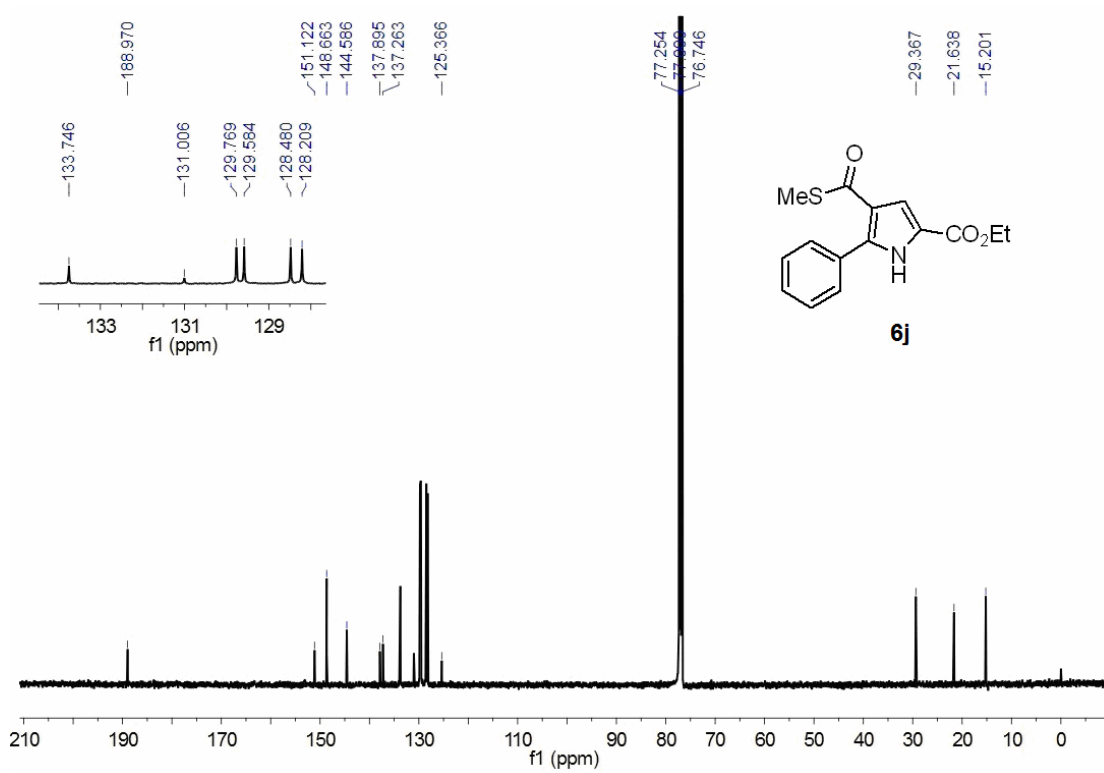

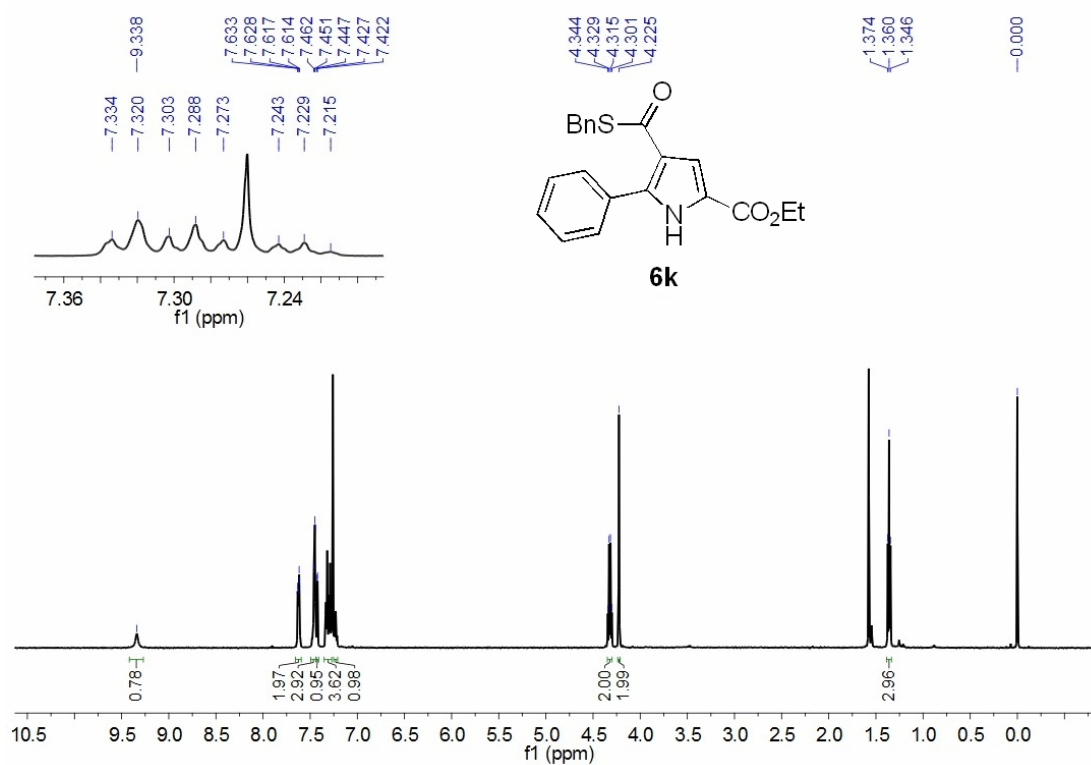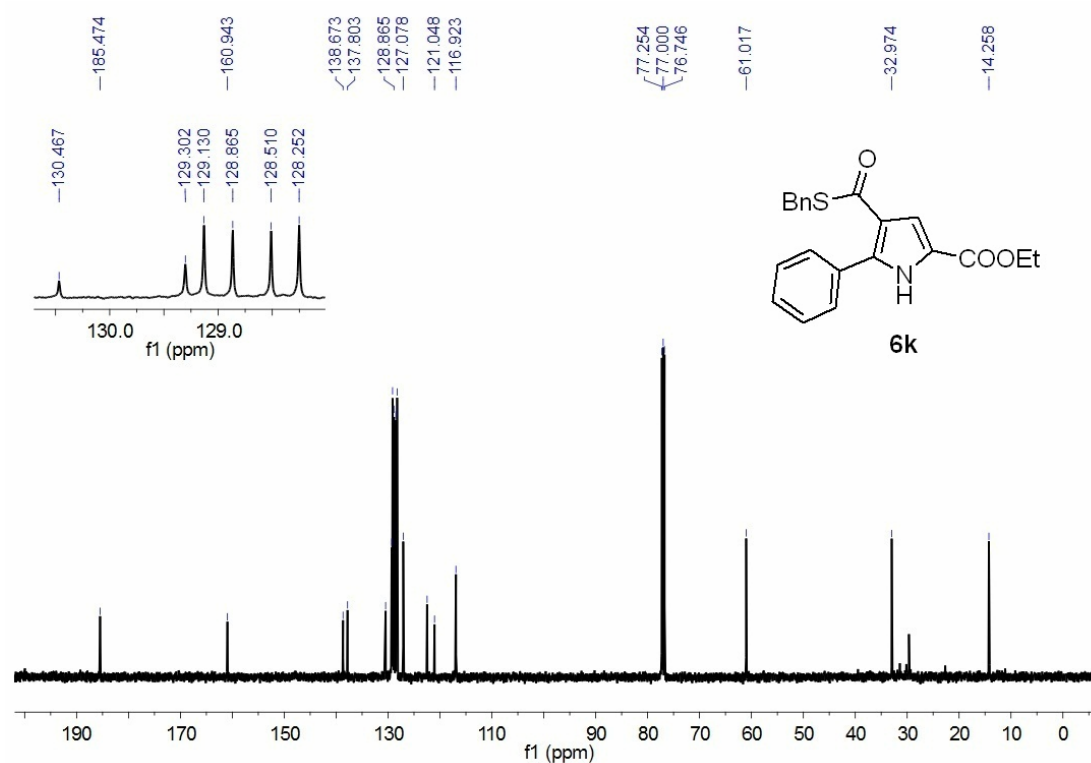

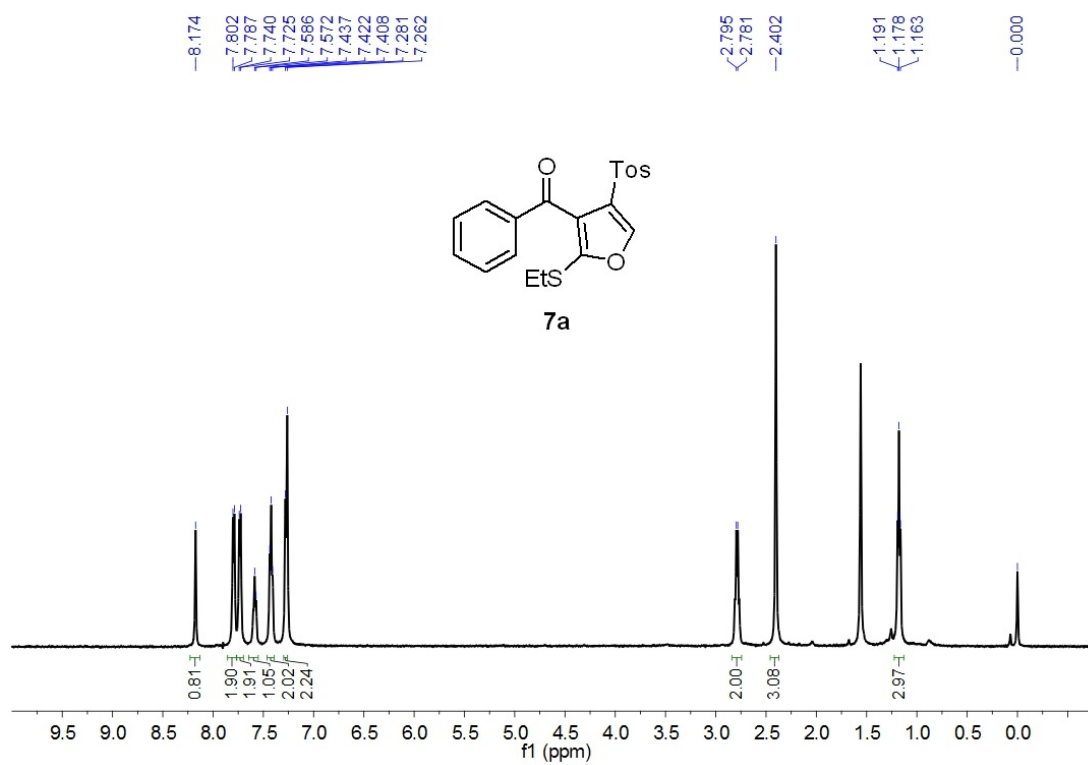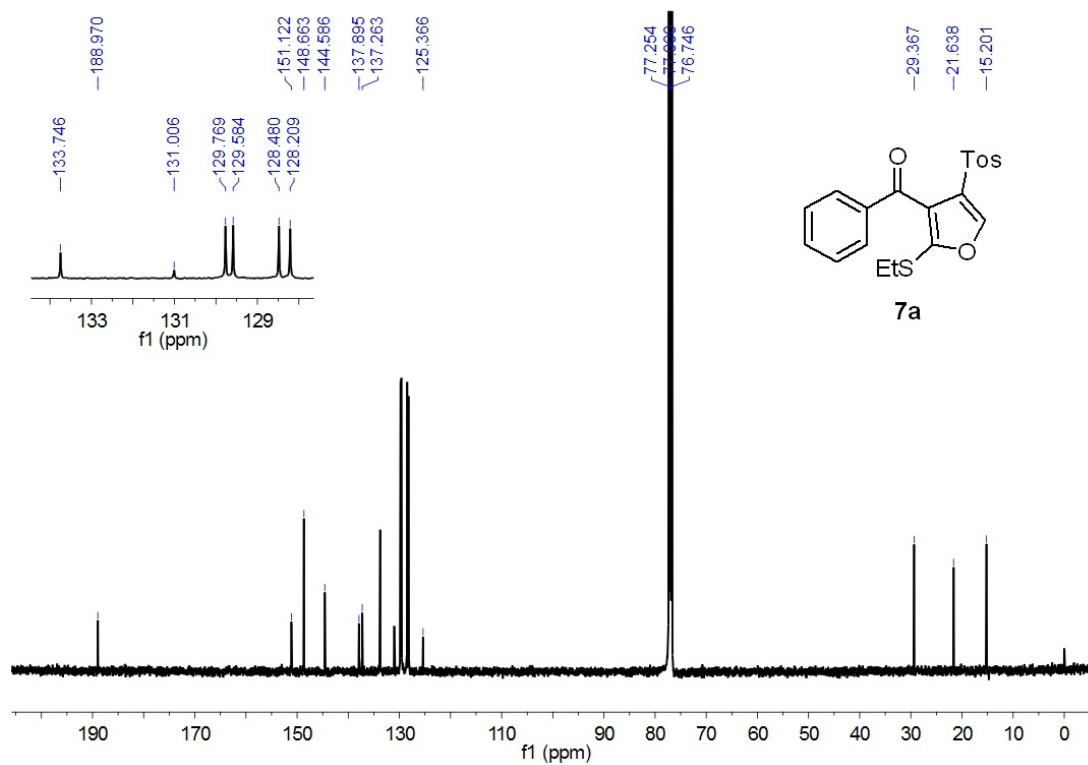

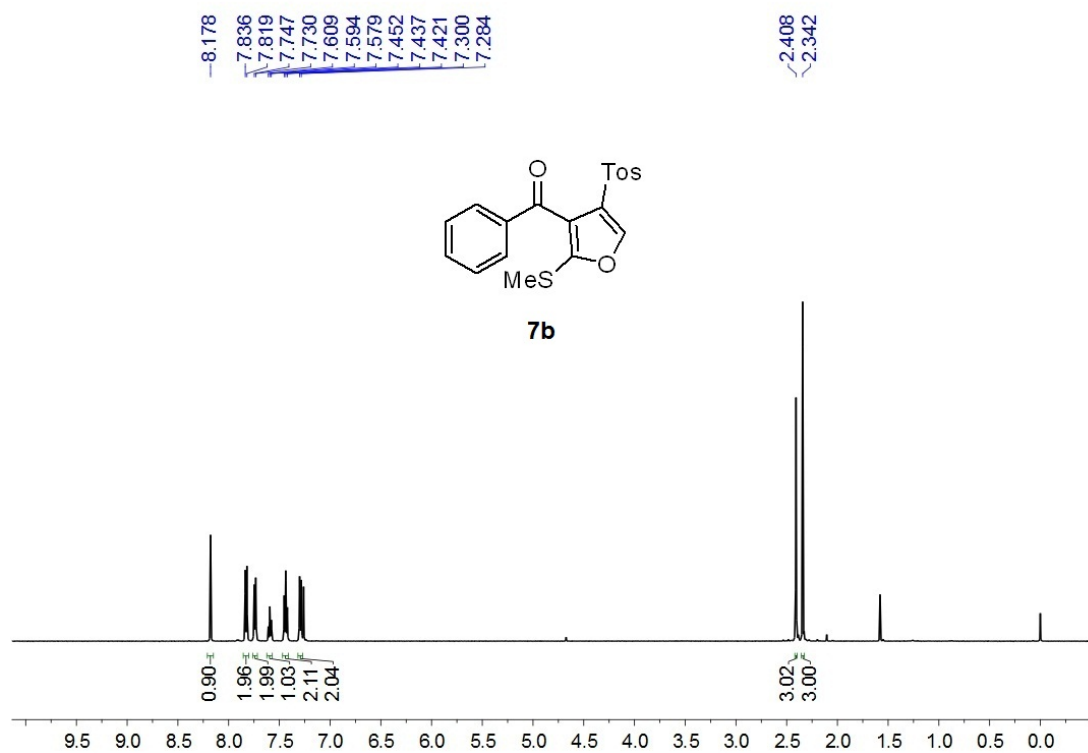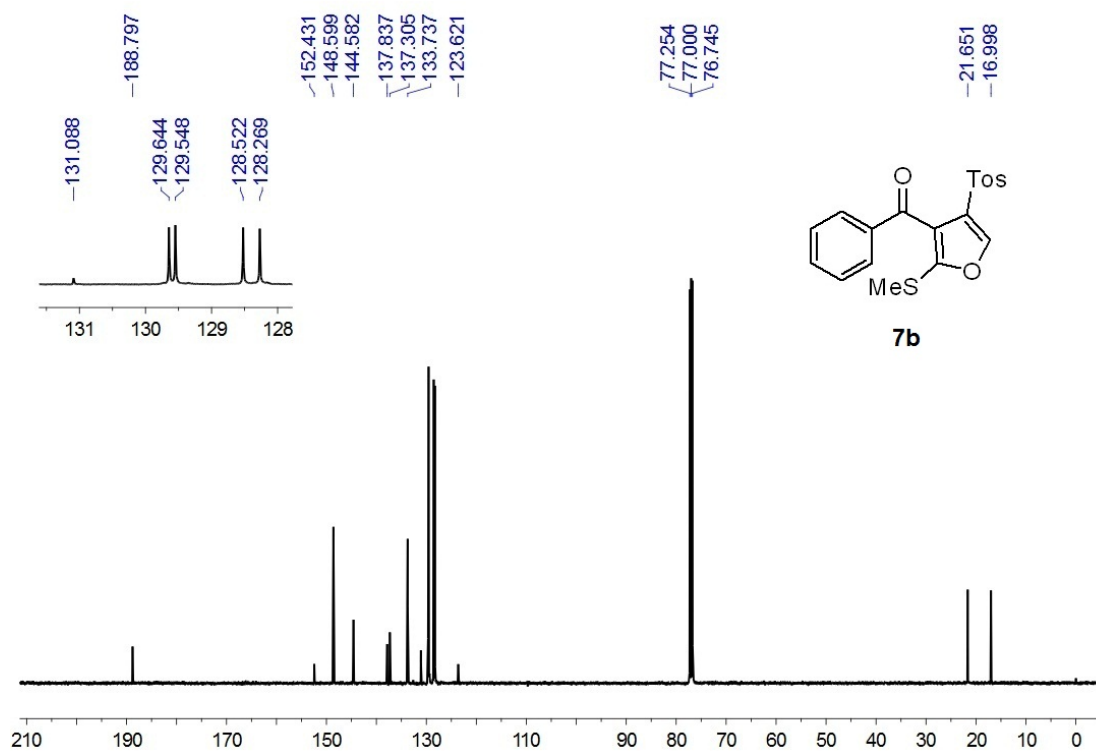

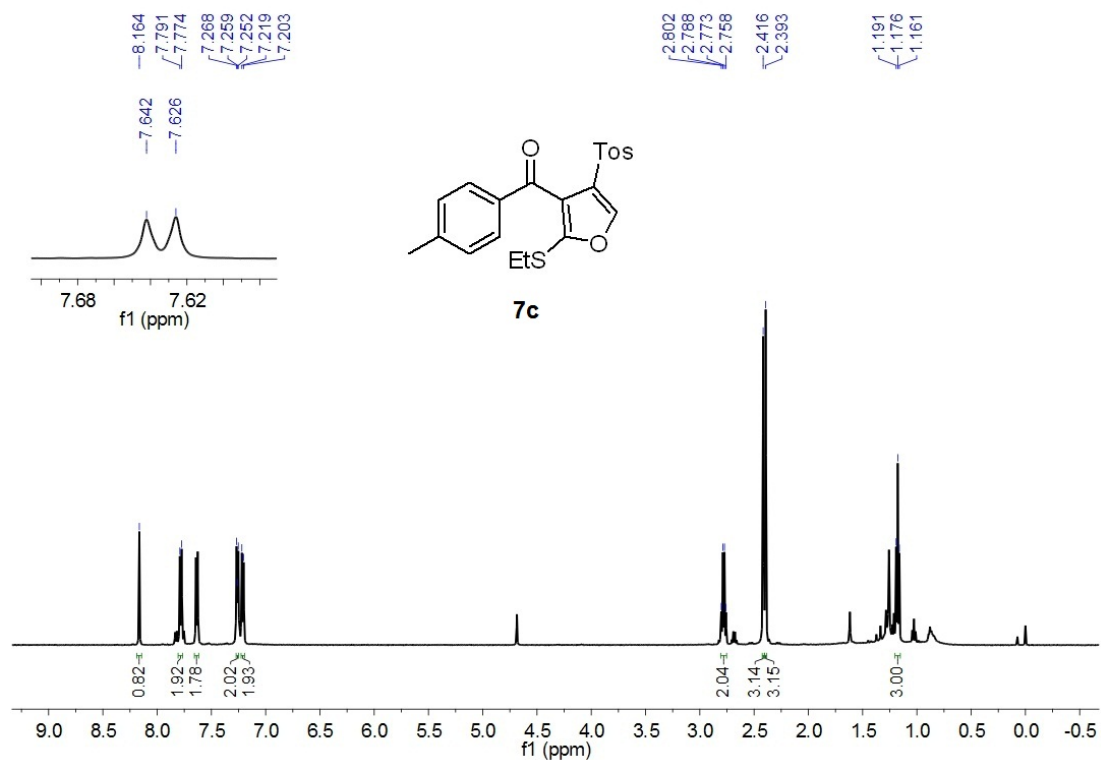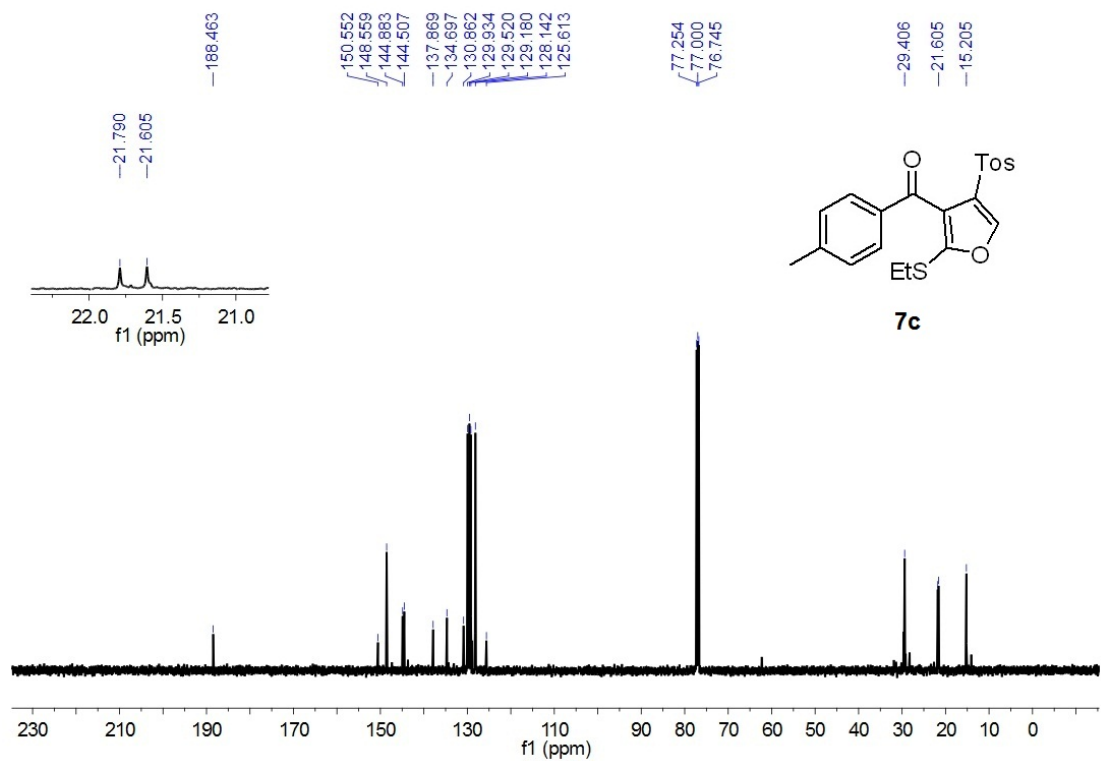

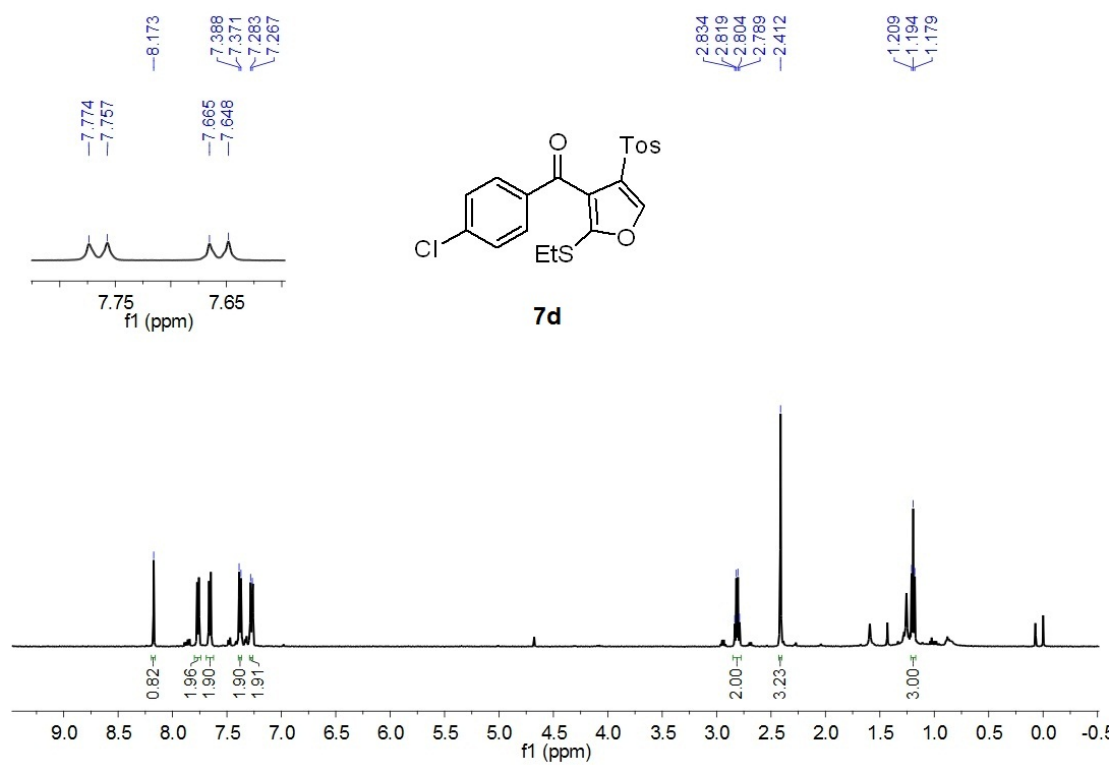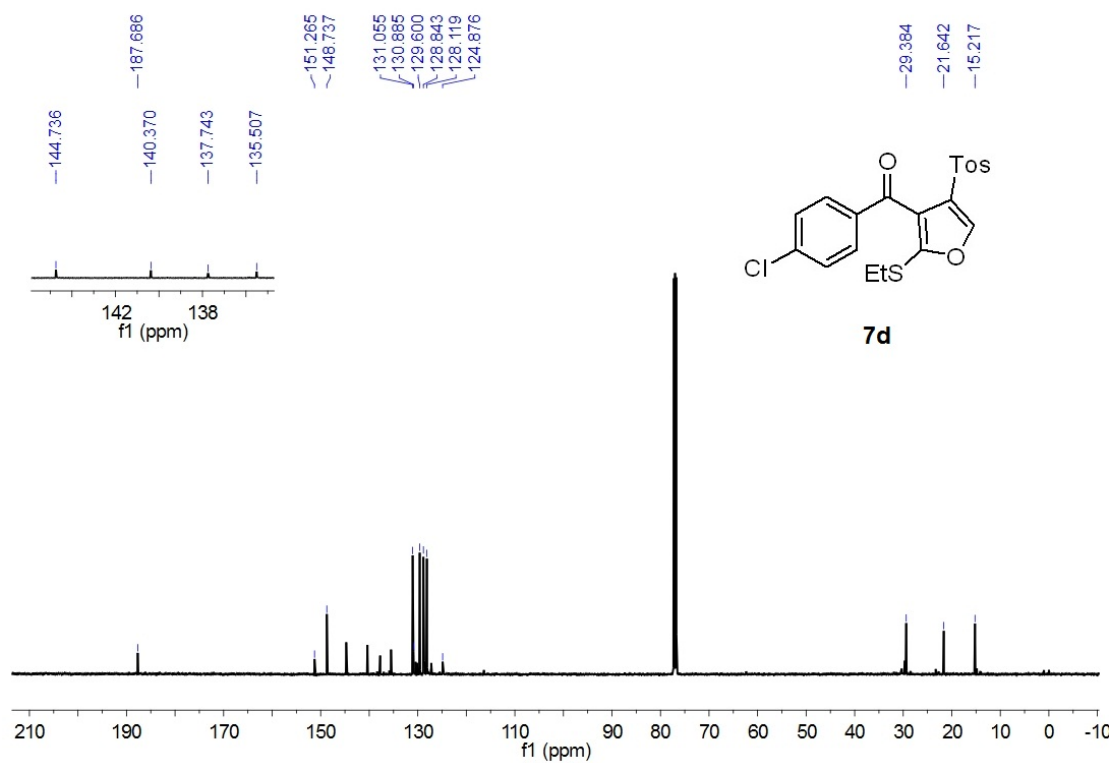

Supplement: c3cc48546c.pdf [file c3cc48546c.pdf]
